# Supplementary material
Source: Royal Society of Chemistry journal article supplement (doi:10.1039/d6ob00564k)

## Supplementary Information

# Dehydrogenative cycloisomerization-arylation reaction of *N*-propargyl carboxamides catalyzed by iodoarene/sulfonyl chloride/sulfoxide systems

Miwa Shoji,<sup>a</sup> Yuki Umakoshi,<sup>a</sup> Akira Tsubouchi,<sup>a</sup> Akira Yoshimura<sup>b</sup> and Akio Saito<sup>a\*</sup>

<sup>a</sup> Division of Applied Chemistry, Institute of Engineering, Tokyo University of Agriculture and Technology, Koganei, Tokyo 184-8588, Japan

<sup>b</sup> Faculty of Pharmaceutical Sciences, Aomori University, Aomori 030-0943, Japan.

\* Correspondence: akio-sai@cc.tuat.ac.jp; Tel.: +81-42-388-7667

### *Table of contents*

1. Optimization of Reaction Conditions (Table S1-S5).....S1
2. General Information.....S4
3. Preparation and Characterization of Arylated Oxazoles **3** (Scheme 2 and 3).....S4
4. Control Experiments (Figure 1 and Scheme 4).....S7
5. <sup>1</sup>H and <sup>13</sup>C NMR Spectra of **3aa-3ja**, **3bb-3bj**, **4a**, **5a** and **6a**.....S17

## 1. Optimization of Reaction Conditions

**Table S1.** Additive effects of sulfonating agents (SAs) and TEDA-PF<sub>6</sub> for the formation of **3a**

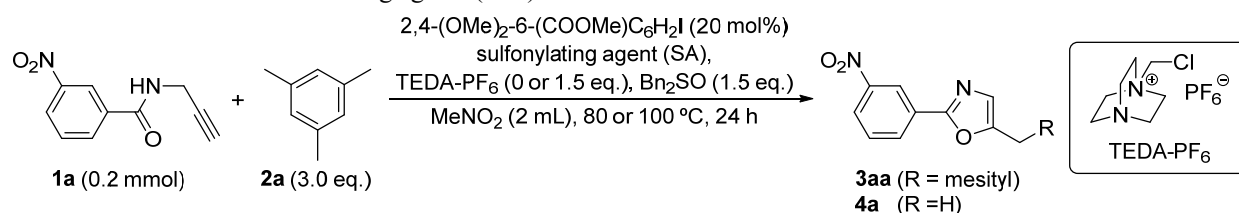

| entry | SAs (eq.)               | TEDA-PF <sub>6</sub> (eq.) | Temp. (°C) | <b>3a</b> <sup>a</sup> (%) | <b>4a</b> <sup>a</sup> (%) |
|-------|-------------------------|----------------------------|------------|----------------------------|----------------------------|
| 1     | <i>o</i> -NsCl (1.5)    | 1.5                        | 100        | 47                         | 4                          |
| 2     | <i>o</i> -NsCl (3.0)    | 1.5                        | 100        | 56 (49)                    | 6                          |
| 3     | <i>m</i> -NsCl (1.5)    | 1.5                        | 100        | 48                         | 8                          |
| 4     | <i>p</i> -NsCl (1.5)    | 1.5                        | 100        | 51 (48)                    | 5                          |
| 5     | TsCl (1.5)              | 1.5                        | 100        | 27                         | 7                          |
| 6     | TsCl (3.0)              | 1.5                        | 100        | 43 (34)                    | 17                         |
| 7     | Tf <sub>2</sub> O (1.5) | 1.5                        | 100        | 17                         | trace                      |
| 8     | Tf <sub>2</sub> O (1.5) | 1.5                        | 80         | 7                          | trace                      |
| 9     | Tf <sub>2</sub> O (3.0) | 1.5                        | 80         | 12                         | trace                      |
| 10    | <i>o</i> -NsCl (1.5)    | 0.0                        | 100        | 79 (52)                    | 9                          |
| 11    | <i>m</i> -NsCl (1.5)    | 0.0                        | 100        | 75 (<70) <sup>b</sup>      | 7                          |
| 12    | <i>p</i> -NsCl (1.5)    | 0.0                        | 100        | 65 (55)                    | 4                          |
| 13    | <i>p</i> -NsCl (3.0)    | 0.0                        | 100        | 50                         | 23                         |
| 14    | TsCl (1.5)              | 0.0                        | 100        | 30                         | 5                          |
| 15    | MsCl (1.5)              | 0.0                        | 100        | 22                         | 5                          |
| 16    | BzCl (1.5)              | 0.0                        | 100        | 37                         | 4                          |

<sup>a</sup> Determined by <sup>1</sup>H NMR analysis using an internal standard. Values in parentheses show the isolated yields. <sup>b</sup> Contains impurities of unknown structure.

**Table S2.** Evaluation of sulfoxides for the formation of **3a**

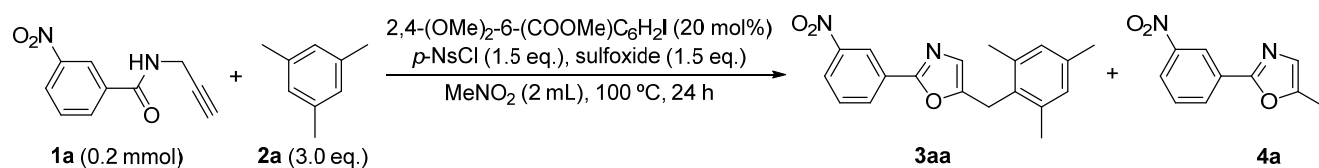

| entry | Sulfoxides (eq.)         | <b>3a</b> <sup>a</sup> (%) | <b>4a</b> <sup>a</sup> (%) | <b>1a</b> <sup>a</sup> (%) |
|-------|--------------------------|----------------------------|----------------------------|----------------------------|
| 1     | Bn <sub>2</sub> SO       | 65 (55)                    | 4                          | 0                          |
| 2     | Ph <sub>2</sub> SO       | trace                      | 18                         | 27                         |
| 3     | dibenzothiophene S-oxide | trace                      | 90                         | 4                          |
| 4     | Me <sub>2</sub> SO       | 42                         | 6                          | 0                          |
| 5     | PhS(O)Me                 | 65 (47) <sup>b</sup>       | ND <sup>c</sup>            | 0                          |

<sup>a</sup> Determined by <sup>1</sup>H NMR analysis using an internal standard. Values in parentheses show the isolated yields. <sup>b</sup> Contains impurities of unknown structure. <sup>c</sup> ND = not determined.

**Table S3.** Evaluation of iodoarene (ArI) precatalysts and solvents for the formation of **3a**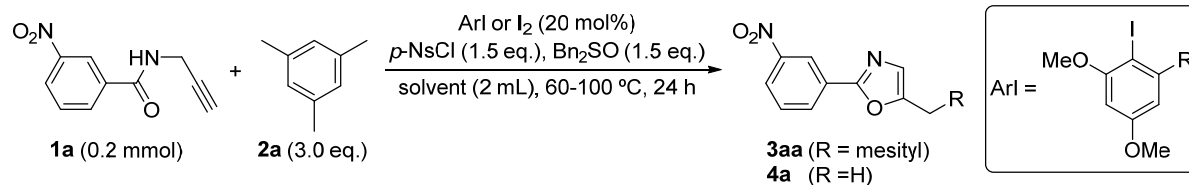

| entry | ArI or I <sub>2</sub> | Solvent           | Temp. (°C) | <b>3aa</b> <sup>a</sup> (%) | <b>4a</b> <sup>a</sup> (%) | <b>1a</b> <sup>a</sup> (%) |
|-------|-----------------------|-------------------|------------|-----------------------------|----------------------------|----------------------------|
| 1     | ArI (R = COOMe)       | MeNO <sub>2</sub> | 100        | 65 (55)                     | 4                          | 0                          |
| 2     | ArI (R = COOH)        | MeNO <sub>2</sub> | 100        | 72 (54)                     | 4                          | 0                          |
| 3     | ArI (R = CONHMe)      | MeNO <sub>2</sub> | 100        | 65 (49)                     | 4                          | 0                          |
| 4     | ArI (R = OMe)         | MeNO <sub>2</sub> | 100        | 66 (<58) <sup>b</sup>       | 7                          | 0                          |
| 5     | I <sub>2</sub>        | MeNO <sub>2</sub> | 100        | 62 (<43) <sup>b</sup>       | 10                         | 0                          |
| 6     | ArI (R = COOMe)       | DCE               | 80         | trace                       | trace                      | 25                         |
| 7     | ArI (R = COOMe)       | HFIP              | 60         | 36                          | trace                      | 32                         |
| 8     | ArI (R = COOMe)       | MeCN              | 85         | 35                          | 45                         | 0                          |
| 9     | ArI (R = COOMe)       | EtCN              | 100        | 32                          | 10                         | 0                          |
| 10    | ArI (R = COOMe)       | 1,4-dioxane       | 100        | 0                           | 0                          | 40                         |
| 11    | ArI (R = COOMe)       | DMF               | 100        | 0                           | trace                      | 0                          |
| 12    | ArI (R = COOMe)       | DMSO              | 100        | 0                           | 0                          | 0                          |
| 13    | ArI (R = COOMe)       | MeNO <sub>2</sub> | 80         | 28                          | trace                      | 0                          |

<sup>a</sup> Determined by <sup>1</sup>H NMR analysis using an internal standard. Values in parentheses show the isolated yields. <sup>b</sup> Contains impurities of unknown structure.

**Table S4.** Evaluation of the amount of each reagent for the formation of **3a**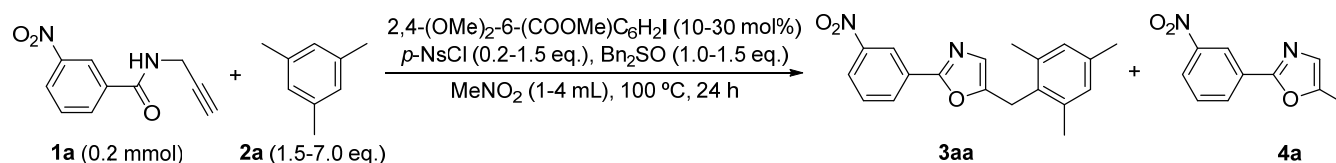

| entry          | <b>2a</b> (eq.) | ArI (mol%) | <i>p</i> -NsCl (eq.) | Bn <sub>2</sub> SO (eq.) | MeNO <sub>2</sub> (mL) | <b>3aa</b> <sup>a</sup> (%) | <b>4a</b> <sup>a</sup> (%) |
|----------------|-----------------|------------|----------------------|--------------------------|------------------------|-----------------------------|----------------------------|
| 1              | 3.0             | 20         | 1.5                  | 1.5                      | 2                      | 65 (55)                     | 4                          |
| 2              | 3.0             | 20         | 1.5                  | 1.5                      | 1                      | 69 (49)                     | 6                          |
| 3              | 3.0             | 20         | 1.5                  | 1.5                      | 4                      | 70 (<62) <sup>b</sup>       | 4                          |
| 4 <sup>c</sup> | 3.0             | 20         | 0.2                  | 1.5                      | 2                      | 36                          | 8                          |
| 5              | 3.0             | 20         | 1.2                  | 1.2                      | 2                      | 70                          | 7                          |
| 6              | 3.0             | 20         | 1.1                  | 1.1                      | 2                      | 70 (58)                     | 6                          |
| 7              | 3.0             | 20         | 1.0                  | 1.0                      | 2                      | 63                          | 6                          |
| 8              | 3.0             | 10         | 1.1                  | 1.1                      | 2                      | 57                          | 11                         |
| 9              | 3.0             | 30         | 1.1                  | 1.1                      | 2                      | 66                          | 50                         |
| 10             | 1.5             | 20         | 1.1                  | 1.1                      | 2                      | 56                          | 9                          |
| 11             | 5.0             | 20         | 1.1                  | 1.1                      | 2                      | 87 (67)                     | 14                         |
| 12             | 7.0             | 20         | 1.1                  | 1.1                      | 2                      | 75 (58)                     | trace                      |

<sup>a</sup> Determined by <sup>1</sup>H NMR analysis using an internal standard. Values in parentheses show the isolated yields. <sup>b</sup> Contains impurities of unknown structure. <sup>c</sup> Recovery of **1a**: 14%.

**Table S5.** Evaluation of reaction times for the formation of **3a**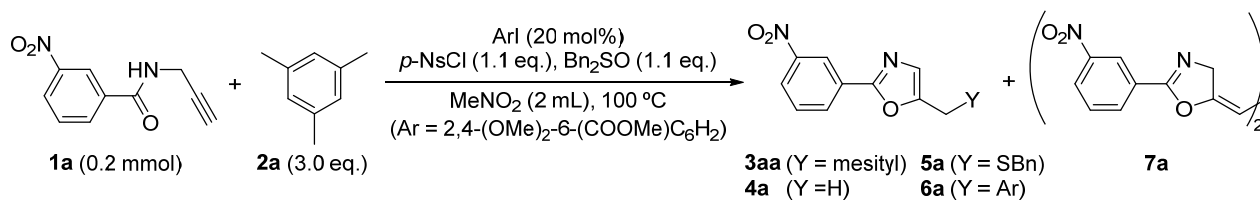

| entry | Time (h) | <b>3aa</b> <sup>a</sup> (%) | <b>4a</b> <sup>a</sup> (%) | <b>5a</b> <sup>a</sup> (%) | <b>6a</b> <sup>a</sup> (%) | <b>7a</b> <sup>a</sup> (%) | <b>1a</b> <sup>a</sup> (%) |
|-------|----------|-----------------------------|----------------------------|----------------------------|----------------------------|----------------------------|----------------------------|
| 1     | 1        | 9                           | 0                          | 18                         | trace                      | 7                          | 22                         |
| 2     | 8        | 47                          | 5                          | 13                         | trace                      | 5                          | 0                          |
| 3     | 15       | 58 (47)                     | 7                          | trace                      | trace                      | 4                          | 0                          |
| 4     | 24       | 65 (55)                     | 4                          | trace                      | trace                      | trace                      | 0                          |
| 5     | 30       | 80 (57)                     | 5                          | trace                      | trace                      | trace                      | 0                          |

<sup>a</sup> Determined by <sup>1</sup>H NMR analysis using an internal standard. Values in parentheses show the isolated yields.

## 2. General Information

All reactions were carried out under an argon atmosphere. *N*-Propargyl carboxamides **1a**,<sup>1a</sup> **1b**,<sup>1a</sup> **1c**,<sup>1b</sup> **1d**,<sup>1a</sup> **1e**,<sup>1c</sup> **1f**,<sup>1a</sup> **1g**,<sup>1a</sup> **1h**,<sup>1a</sup> **1i**,<sup>1d</sup> **1j**<sup>1e</sup> and 2,4-(OMe)<sub>2</sub>-6-(COOMe)C<sub>6</sub>H<sub>2</sub>I<sup>2</sup> were prepared by the method reported in the literatures. Arenes **2a-k**, *p*-NsCl and Bn<sub>2</sub>SO were commercial products used without purification. All solvents were purchased as the “anhydrous” and used without further purification. For the thin-layer chromatography (TLC) analysis, Merck precoated TLC plates (silica gel 60 F<sub>254</sub>) were used. Column chromatography was performed on silica gel 60N (63–200 μm, neutral, Kanto Kagaku Co., Ltd.). Medium pressure liquid chromatography (MPLC) was carried out with YAMAZEN EPCLC-W-Prep 2XY.

<sup>1</sup>H and <sup>13</sup>C NMR spectra were measured at 500 and 125 MHz in CDCl<sub>3</sub>, and the chemical shifts are given in ppm using CHCl<sub>3</sub> (7.26 ppm) in CDCl<sub>3</sub> for <sup>1</sup>H NMR and CDCl<sub>3</sub> (77.0 ppm) for <sup>13</sup>C NMR as an internal standard, respectively. Splitting patterns of an apparent multiplet associated with an averaged coupling constant were designed as s (singlet), d (doublet), t (triplet), q (quartet), m (multiplet), and br (broadened). HRMS were recorded on Bruker Daltonics microTOF-QII by ESI-TOF method.

## 3. Preparation and Characterization of Arylated Oxazoles **3** (Scheme 2 and 3)

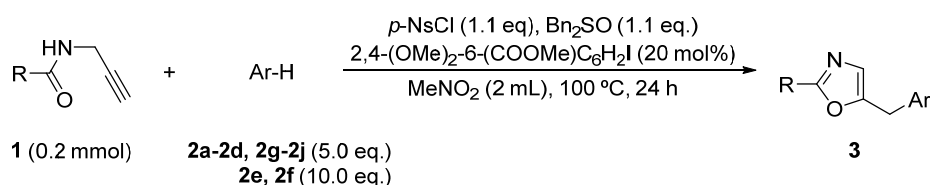

To a solution of *N*-propargyl carboxamide **1** (0.2 mmol), 2,4-(OMe)<sub>2</sub>-6-(COOMe)C<sub>6</sub>H<sub>2</sub>I (12.9 mg, 0.04 mmol) and dibenzyl sulfoxide (50.7 mg, 0.22 mmol) in MeNO<sub>2</sub> (2.0 mL) were added aromatic compound **2** (1.0 mmol for **2a-2d** and **2g-2j**; 2.0 mmol for **2e** and **2f**) and *p*-NsCl (48.8 mg, 0.22 mmol). After being stirred at 100 °C for 24 h, the reaction mixture was filtered through a short silica gel column using ethyl acetate. The filtrate was concentrated in vacuo to dryness, and then the residue was purified by medium-pressure liquid chromatography (MPLC) or preparative thin-layer chromatography (PTLC) to give oxazole **3**.

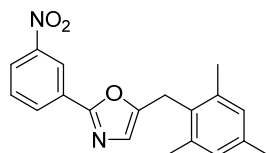

**2-(3-Nitrophenyl)-5-(2,4,6-trimethylbenzyl)oxazole (3aa)**: MPLC (hexane/EtOAc = 90:10), 42.9 mg (67%). Yellow solid. <sup>1</sup>H NMR (500 MHz, CDCl<sub>3</sub>) δ: 2.29 (s, 3H), 2.36 (s, 6H), 4.06 (s, 2H), 6.67 (s, 1H), 6.91 (s, 2H), 7.62 (dd, *J* = 8.0, 8.0 Hz, 1H), 8.26 (dd, *J* = 8.0, 1.7 Hz, 1H), 8.29 (dd, *J* = 8.0, 1.7 Hz, 1H), 8.80 (dd, *J* = 1.7, 1.7 Hz, 1H). <sup>13</sup>C{<sup>1</sup>H} NMR (125 MHz, CDCl<sub>3</sub>) δ: 19.9, 20.9, 26.0, 120.9, 124.3, 124.9, 129.2, 129.3, 129.4, 129.8, 131.5, 136.70, 136.74, 148.6, 152.3, 158.7. The <sup>1</sup>H and <sup>13</sup>C NMR spectra of the product were identical to those reported in the literature.<sup>3</sup>

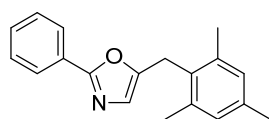

**2-Phenyl-5-(2,4,6-trimethylbenzyl)oxazole (3ba)**: MPLC (hexane/EtOAc = 90:10) then reverse phase MPLC (MeCN only), 36.0 mg (65%). White solid. <sup>1</sup>H NMR (500 MHz, CDCl<sub>3</sub>) δ: 2.29 (s, 3H), 2.37 (s, 6H), 4.04 (s, 2H), 6.63 (s, 1H), 6.91 (s, 2H), 7.38–7.50 (m, 3H), 7.98 (d, *J* = 6.9 Hz, 2H). <sup>13</sup>C{<sup>1</sup>H} NMR (125 MHz, CDCl<sub>3</sub>) δ: 19.9, 20.9, 26.0, 124.2, 125.9, 127.7, 128.7, 129.1, 129.9, 136.4, 136.7, 150.9, 160.9 (note that two carbon peaks overlap with each other). The <sup>1</sup>H and <sup>13</sup>C NMR spectra of the product were identical to those reported in the literature.<sup>3</sup>

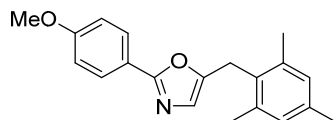

**2-(4-Methoxyphenyl)-5-(2,4,6-trimethylbenzyl)oxazole (3ca)**: PTLC (hexane/EtOAc = 14:1), 40.8 mg (66%). White solid. <sup>1</sup>H NMR (500 MHz, CDCl<sub>3</sub>) δ: 2.28 (s, 3H), 2.36 (s, 6H), 3.85 (s, 3H), 4.01 (s, 2H), 6.57 (s, 1H), 6.90 (s, 2H), 6.94 (d, *J* = 8.8 Hz, 2H), 7.91 (d, *J* = 8.8 Hz, 2H). <sup>13</sup>C{<sup>1</sup>H} NMR (125 MHz, CDCl<sub>3</sub>) δ: 19.9, 20.9, 26.0, 55.3, 114.1, 120.6, 123.9, 127.6, 127.6, 129.1, 130.1, 136.4, 136.8, 150.2, 161.0 (note that two carbon peaks overlap with each other). The <sup>1</sup>H and <sup>13</sup>C NMR spectra of the product were identical to those reported in the literature.<sup>3</sup>

<sup>1</sup> (a) N. Asari, Y. Takemoto, Y. Shinomoto, T. Yagyu, A. Yoshimura, V. V. Zhdankin, and A. Saito, *Asian J. Org. Chem.*, 2016, **5**, 1314; (b) S. Punna, S. Meunier and M. G. Finn, *Org. Lett.*, 2004, **6**, 2777; (c) L. Willand, M. Desroses, P. Toto, B. Dirie, Z. Lens, V. Villelet, P. Rucktooa, C. Loch and A. Baulard, *ACS Chem. Biol.*, 2010, **5**, 1007; (d) W.-C. Cheng, C.-K. Lin, H.-Y. Li, Y.-C. Chang, S.-J. Lu, Y.-S. Chen and S.-Y. Chang, *Chem. Commun.*, 2018, **54**, 2647; (e) N. Wang, B. Chen and S. Ma, *Asian J. Org. Chem.*, 2014, **3**, 723.

<sup>2</sup> M. Ehrlich and T. Carell, *Eur. J. Org. Chem.*, 2013, **2013**, 77.

<sup>3</sup> Y. Umakoshi, Y. Takemoto, A. Tsubouchi, V. V. Zhdankin, A. Yoshimura and A. Saito, *Adv. Synth. Catal.*, 2022, **364**, 2053.

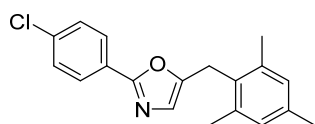

**2-(4-Chlorophenyl)-5-(2,4,6-trimethylbenzyl)oxazole (3da):** MPLC (hexane/EtOAc = 90:10) then reverse phase MPLC (MeCN only), 43.7 mg (70%). White solid.  $^1\text{H}$  NMR (500 MHz,  $\text{CDCl}_3$ )  $\delta$ : 2.29 (s, 3H), 2.36 (s, 6H), 4.03 (s, 2H), 6.63 (s, 1H), 6.91 (s, 2H), 7.41 (d,  $J = 8.6$  Hz, 2H), 7.91 (d,  $J = 8.6$  Hz, 2H).  $^{13}\text{C}\{^1\text{H}\}$  NMR (125 MHz,  $\text{CDCl}_3$ )  $\delta$ : 19.8, 20.8, 25.9, 124.3, 126.1, 127.2, 128.9, 129.1, 129.7, 135.9, 136.5, 136.7, 151.2, 160.0. The  $^1\text{H}$  and  $^{13}\text{C}$  NMR spectra of the product were identical to those reported in the literature.<sup>3</sup>

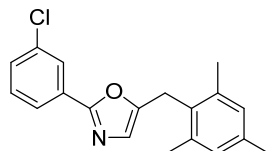

**2-(3-Chlorophenyl)-5-(2,4,6-trimethylbenzyl)oxazole (3ea):** MPLC (hexane/EtOAc = 90:10) then reverse phase MPLC (MeCN only), 44.4 mg (71%).  $^1\text{H}$  NMR (500 MHz,  $\text{CDCl}_3$ )  $\delta$ : 2.29 (s, 3H), 2.36 (s, 6H), 4.04 (s, 2H), 6.64 (s, 1H), 6.91 (s, 2H), 7.34-7.41 (m, 2H), 7.86 (ddd,  $J = 6.9, 2.3, 2.3$  Hz, 1H), 7.97 (dd,  $J = 2.3, 2.3$  Hz, 1H).  $^{13}\text{C}\{^1\text{H}\}$  NMR (125 MHz,  $\text{CDCl}_3$ )  $\delta$ : 19.9, 20.8, 25.9, 124.0, 124.4, 126.0, 129.1, 129.2, 129.6, 129.9, 130.0, 134.7, 136.5, 136.7, 151.5, 159.6. The  $^1\text{H}$  and  $^{13}\text{C}$  NMR spectra of the product were identical to those reported in the literature.<sup>3</sup>

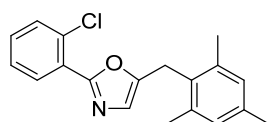

**2-(2-Chlorophenyl)-5-(2,4,6-trimethylbenzyl)oxazole (3fa):** MPLC (hexane/EtOAc = 90:10) then reverse phase MPLC (MeCN only), 36.5 mg (59%).  $^1\text{H}$  NMR (500 MHz,  $\text{CDCl}_3$ )  $\delta$ : 2.28 (s, 3H), 2.37 (s, 6H), 4.05 (s, 2H), 6.75 (s, 1H), 6.89 (s, 2H), 7.29-7.37 (m, 2H), 7.45-7.50 (m, 1H), 7.91-7.96 (m, 1H).  $^{13}\text{C}\{^1\text{H}\}$  NMR (125 MHz,  $\text{CDCl}_3$ )  $\delta$ : 19.9, 20.9, 26.0, 124.3, 126.5, 126.7, 129.1, 129.9, 130.56, 130.61, 131.1, 132.1, 136.5, 136.8, 151.4, 158.7. The  $^1\text{H}$  and  $^{13}\text{C}$  NMR spectra of the product were identical to those reported in the literature.<sup>3</sup>

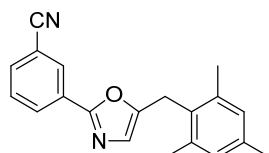

**2-(3-Cyanophenyl)-5-(2,4,6-trimethylbenzyl)oxazole (3ga):** MPLC (hexane/EtOAc = 90:10), 34.5 mg (57%). White solid.  $^1\text{H}$  NMR (500 MHz,  $\text{CDCl}_3$ )  $\delta$ : 2.29 (s, 3H), 2.36 (s, 6H), 4.05 (s, 2H), 6.68 (s, 1H), 6.91 (s, 2H), 7.55 (dd,  $J = 8.0, 8.0$  Hz, 1H), 7.68 (ddd,  $J = 8.0, 1.7, 1.7$  Hz, 1H), 8.19 (ddd,  $J = 8.0, 1.7, 1.7$  Hz, 1H), 8.24 (dd,  $J = 1.7, 1.7$  Hz, 1H).  $^{13}\text{C}\{^1\text{H}\}$  NMR (125 MHz,  $\text{CDCl}_3$ )  $\delta$ : 19.9, 20.8, 25.9, 113.1, 118.1, 124.7, 128.8, 129.1, 129.3, 129.4, 129.6, 129.8, 133.0, 136.6, 136.7, 152.1, 158.7. The  $^1\text{H}$  and  $^{13}\text{C}$  NMR spectra of the product were identical to those reported in the literature.<sup>3</sup>

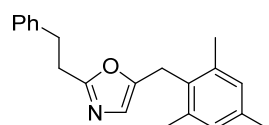

**2-Phenethyl-5-(2,4,6-trimethylbenzyl)oxazole (3ha):** MPLC (hexane/EtOAc = 90:10) then reverse phase MPLC (MeCN only), 6.3 mg (10%). Yellow solid. IR (neat)  $\nu$   $\text{cm}^{-1}$ : 2924, 2856, 1603, 1572, 1496, 1454.  $^1\text{H}$  NMR (500 MHz,  $\text{CDCl}_3$ )  $\delta$ : 2.28 (s, 3H), 2.30 (s, 6H), 2.98-3.09 (m, 4H), 3.90 (s, 2H), 6.39 (s, 1H), 6.88 (s, 2H), 7.14-7.23 (m, 3H), 7.25-7.29 (m, 2H).  $^{13}\text{C}\{^1\text{H}\}$  NMR (125 MHz,  $\text{CDCl}_3$ )  $\delta$ : 19.8, 20.9, 25.8, 30.1, 33.1, 122.5, 126.3, 128.3, 128.5, 129.0, 130.1, 136.3, 136.8, 140.5, 150.3, 163.1. HRMS (ESI):  $m/z$  calcd. for  $\text{C}_{21}\text{H}_{23}\text{NO}^+$  [ $M + \text{H}$ ] $^+$  306.1852; found 306.1860.

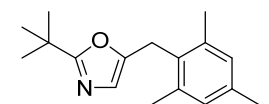

**2-(tert-Butyl)-5-(2,4,6-trimethylbenzyl)oxazole (3ia):** MPLC (hexane/EtOAc = 90:10), 18.0 mg (35%). Colorless oil.  $^1\text{H}$  NMR (500 MHz,  $\text{CDCl}_3$ )  $\delta$ : 1.35 (s, 9H), 2.27 (s, 3H), 2.31 (s, 6H), 3.91 (s, 2H), 6.34 (s, 1H), 6.87 (s, 2H).  $^{13}\text{C}\{^1\text{H}\}$  NMR (125 MHz,  $\text{CDCl}_3$ )  $\delta$ : 19.8, 20.8, 25.9, 28.6, 33.6, 122.1, 129.0, 130.2, 136.2, 136.7, 150.0, 170.2. The  $^1\text{H}$  and  $^{13}\text{C}$  NMR spectra of the product were identical to those reported in the literature.<sup>3</sup>

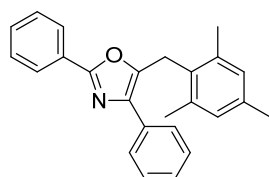

**2,4-Diphenyl-5-(2,4,6-trimethylbenzyl)oxazole (3ja):** MPLC (hexane/EtOAc = 90:10), 33.7 mg (48%). White solid.  $^1\text{H}$  NMR (500 MHz,  $\text{CDCl}_3$ )  $\delta$ : 2.28 (s, 9H), 4.28 (s, 2H), 6.87 (s, 2H), 7.36-7.45 (m, 4H), 7.50 (dd,  $J = 8.0, 8.0$  Hz, 2H), 7.79 (d,  $J = 8.0$  Hz, 2H), 7.93-7.99 (m, 2H).  $^{13}\text{C}\{^1\text{H}\}$  NMR (125 MHz,  $\text{CDCl}_3$ )  $\delta$ : 20.2, 20.8, 26.1, 126.1, 127.4, 127.5, 127.6, 128.5, 128.6, 128.9, 129.9, 130.9, 132.4, 136.1, 136.2, 136.8, 145.6, 159.7. The  $^1\text{H}$  and  $^{13}\text{C}$  NMR spectra of the product were identical to those reported in the literature.<sup>3</sup>

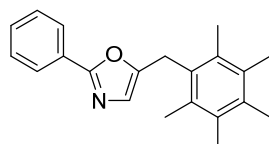

**5-(2,3,4,5,6-Pentamethylbenzyl)-2-phenyloxazole (3bb):** MPLC (hexane/EtOAc = 90:10) then reverse phase MPLC (MeCN only), 37.2 mg (61%). White solid.  $^1\text{H}$  NMR (500 MHz,  $\text{CDCl}_3$ )  $\delta$ : 2.28 (s, 6H), 2.29 (s, 3H), 2.34 (s, 6H), 4.15 (s, 2H), 6.65 (s, 1H), 7.40-7.47 (m, 3H), 7.99-8.04 (m, 2H).  $^{13}\text{C}\{^1\text{H}\}$  NMR (125 MHz,  $\text{CDCl}_3$ )  $\delta$ : 16.7, 16.9, 17.0, 27.5, 124.5, 126.0, 127.8, 128.6, 129.9, 130.1, 132.5, 132.8, 133.9, 151.5, 160.8. The  $^1\text{H}$  and  $^{13}\text{C}$  NMR spectra of the product were identical to those reported in the literature.<sup>3</sup>

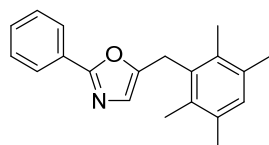

**2-Phenyl-5-(2,3,5,6-tetramethylbenzyl)oxazole (3bc):** PTLC (hexane/EtOAc = 10:1), 36.1 mg (62%). White solid.  $^1\text{H}$  NMR (500 MHz,  $\text{CDCl}_3$ )  $\delta$ : 2.27 (s, 12H), 4.13 (s, 2H), 6.61 (s, 1H), 6.95 (s, 1H), 7.39-7.47 (m, 3H), 7.97-8.02 (m, 2H).  $^{13}\text{C}\{^1\text{H}\}$  NMR (125 MHz,  $\text{CDCl}_3$ )  $\delta$ : 15.7, 20.6, 27.0, 124.5, 126.0, 127.7, 128.7, 129.9, 130.6, 132.80, 132.85, 133.9,

151.2, 160.8. The  $^1\text{H}$  and  $^{13}\text{C}$  NMR spectra of the product were identical to those reported in the literature.<sup>3</sup>

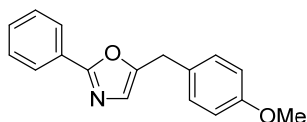

and

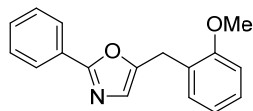

**5-(4-Methoxybenzyl)-2-phenyloxazole (3bd)** and **5-(2-Methoxybenzyl)-2-phenyloxazole (3bd')**: PTLC (hexane/EtOAc = 10:1), 28.4 mg (54%) and 7.5 mg (14%).

**3bd**: Yellow oil.  $^1\text{H}$  NMR (500 MHz,  $\text{CDCl}_3$ )  $\delta$ : 3.80 (s, 3H), 4.01 (s, 2H), 6.83 (s, 1H) 6.88 (d,  $J$  = 8.6 Hz, 2H), 7.21 (d,  $J$  = 8.6 Hz, 2H), 7.38-7.47 (m, 3H), 7.97-8.02 (m, 2H).  $^{13}\text{C}\{^1\text{H}\}$  NMR (125 MHz,  $\text{CDCl}_3$ )  $\delta$ : 31.3, 55.3, 114.1, 124.6, 126.0, 127.7, 128.6, 128.7, 129.7, 130.0, 151.8, 158.5, 161.1. The  $^1\text{H}$  and  $^{13}\text{C}$  NMR spectra of the product were identical to those reported in the literature.<sup>3</sup>

**3bd'**: Pale pink solid. IR (neat)  $\nu$   $\text{cm}^{-1}$ : 2957, 2924, 2837, 1598, 1550, 1494, 1464, 1450, 1438, 1120, 1107, 754, 692.  $^1\text{H}$  NMR (500 MHz,  $\text{CDCl}_3$ )  $\delta$ : 3.85 (s, 3H), 4.07 (s, 2H), 6.81 (s, 1H), 6.88-6.95 (m, 2H), 7.20 (dd,  $J$  = 7.5, 1.7 Hz, 1H), 7.24-7.28 (m, 1H), 7.40-7.45 (m, 3H), 7.98-8.02 (m, 2H).  $^{13}\text{C}\{^1\text{H}\}$  NMR (125 MHz,  $\text{CDCl}_3$ )  $\delta$ : 26.3, 55.4, 110.5, 120.6, 124.7, 125.2, 126.0, 127.8, 128.2, 128.6, 129.8, 130.0, 151.4, 157.3, 160.8. HRMS (ESI):  $m/z$  calcd. for  $\text{C}_{17}\text{H}_{16}\text{NO}_2^+$  [ $\text{M} + \text{H}$ ] $^+$  266.1176; found 266.1183.

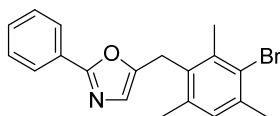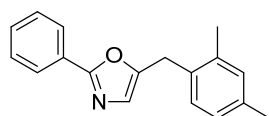

and

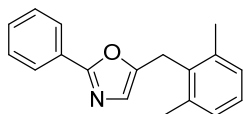

**5-(3-Bromo-2,4,6-trimethylbenzyl)-2-phenyloxazole (3be)**: MPLC (hexane/EtOAc = 90:10) then reverse phase MPLC (MeCN only), 28.3 mg (40%). White solid.  $^1\text{H}$  NMR (500 MHz,  $\text{CDCl}_3$ )  $\delta$ : 2.33 (s, 3H), 2.39 (s, 3H), 2.51 (s, 3H), 4.11 (s, 2H), 6.62 (s, 1H), 6.99 (s, 1H), 7.39-7.51 (m, 3H), 7.94-8.04 (m, 2H).  $^{13}\text{C}\{^1\text{H}\}$  NMR (125 MHz,  $\text{CDCl}_3$ )  $\delta$ : 19.9, 20.5, 24.1, 27.5, 124.5, 126.0, 126.2, 127.6, 128.7, 130.0, 130.4, 131.9, 135.5, 136.7, 137.0, 150.3, 161.1. The  $^1\text{H}$  and  $^{13}\text{C}$  NMR spectra of the product were identical to those reported in the literature.<sup>3</sup>

**5-(2,4-Dimethylbenzyl)-2-phenyloxazole (3bf)** and **5-(2,6-Dimethylbenzyl)-2-phenyloxazole (3bf')**: MPLC (hexane/EtOAc = 90:10) then reverse phase MPLC (MeCN only), 30.2 mg (57%), **3bf:3bf'** = 85:15). Colorless oil.  $^1\text{H}$  NMR (500 MHz,  $\text{CDCl}_3$ )  $\delta$ : 2.32 (s, 0.85 $\times$ 3H), 2.34 (s, 0.85 $\times$ 3H), 2.41 (s, 0.15 $\times$ 6H), 4.01 (s, 0.85 $\times$ 2H), 4.08 (s, 0.15 $\times$ 2H), 6.63 (s, 0.15 $\times$ 1H), 6.75 (s, 0.85 $\times$ 1H), 7.00 (d,  $J$  = 7.5 Hz, 0.85 $\times$ 1H), 7.03 (s, 0.85 $\times$ 1H), 7.06-7.15 (m, 0.85 $\times$ 1H+0.15 $\times$ 3H), 7.38-7.48 (m, 3H), 7.96-8.02 (m, 2H).  $^{13}\text{C}\{^1\text{H}\}$  NMR (125 MHz,  $\text{CDCl}_3$ )  $\delta$ : 19.3 (major), 20.0 (minor), 20.9 (major), 26.3 (minor), 29.5 (major), 124.3 (minor), 124.7 (major), 125.96 (minor), 126.02 (major), 126.9 (major), 127.0 (minor), 127.7, 128.3 (minor), 128.7, 129.5 (major), 129.9, 131.3 (major), 131.7 (major), 133.0 (minor), 136.1 (major), 136.8 (major), 136.9 (minor), 150.6 (minor), 151.3 (major), 160.96 (minor), 161.04 (major). The  $^1\text{H}$  and  $^{13}\text{C}$  NMR spectra of the product were identical to those reported in the literature.<sup>3</sup>

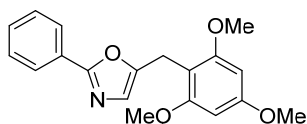

**2-Phenyl-5-(2,4,6-trimethoxybenzyl)oxazole (3bg)**: MPLC (hexane/EtOAc = 90:10), 35.3 mg (54%). White solid, mp 107-108  $^\circ\text{C}$ . IR (KBr)  $\nu$   $\text{cm}^{-1}$ : 2957, 2937, 2840, 1609, 1549, 1502, 1455, 1439, 1371.  $^1\text{H}$  NMR (500 MHz,  $\text{CDCl}_3$ )  $\delta$ : 3.82 (s, 6H), 3.83 (s, 3H), 4.01 (s, 2H), 6.17 (s, 2H), 6.62 (s, 1H), 7.35-7.44 (m, 3H), 7.95-8.00 (m, 2H).  $^{13}\text{C}\{^1\text{H}\}$  NMR (125 MHz,  $\text{CDCl}_3$ )  $\delta$ : 19.3, 55.3, 55.8, 90.6, 105.5, 123.6, 125.9, 128.1, 128.6, 129.5, 152.5, 159.0, 160.1, 160.3. HRMS (ESI):  $m/z$  calcd. for  $\text{C}_{19}\text{H}_{20}\text{NO}_4^+$  [ $\text{M} + \text{H}$ ] $^+$  326.1387; found 326.1388.

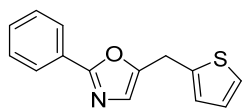

and

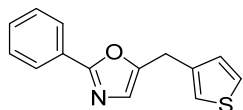

**2-Phenyl-5-(thiophen-2-ylmethyl)oxazole (3bh)** and **2-phenyl-5-(thiophen-3-ylmethyl)oxazole (3bh')**: MPLC (hexane/EtOAc = 90:10), 15.4 mg (32%) and 3.5 mg (7%).

**3bh**: Orange solid, mp 54-55  $^\circ\text{C}$ . IR (KBr)  $\nu$   $\text{cm}^{-1}$ : 2924, 2892, 2851, 1599, 1585, 1490, 1447, 1120, 1104.  $^1\text{H}$  NMR (500 MHz,  $\text{CDCl}_3$ )  $\delta$ : 4.28 (s, 2H), 6.92-7.02 (m, 3H), 7.21 (dd,  $J$  = 5.2, 1.2 Hz, 1H), 7.39-7.50 (m, 3H), 7.99-8.09 (m, 2H).  $^{13}\text{C}\{^1\text{H}\}$  NMR (125 MHz,  $\text{CDCl}_3$ )  $\delta$ : 26.5, 124.5, 124.8, 126.0, 126.1, 127.0, 127.6, 128.7, 130.1, 138.6, 150.4, 161.3. HRMS (ESI):  $m/z$  calcd. for  $\text{C}_{14}\text{H}_{12}\text{NOS}^+$  [ $\text{M} + \text{H}$ ] $^+$  242.0634; found 242.0640.

**3bh'**: Pink solid, mp 51-54  $^\circ\text{C}$ . IR (KBr)  $\nu$   $\text{cm}^{-1}$ : 2959, 2926, 2893, 2857, 1599, 1584, 1490, 1447, 1127, 1120, 1104.  $^1\text{H}$  NMR (500 MHz,  $\text{CDCl}_3$ )  $\delta$ : 4.09 (s, 2H), 6.88 (s, 1H), 7.04 (dd,  $J$  = 5.2, 1.2 Hz, 1H), 7.11 (dd,  $J$  = 2.9, 1.2 Hz, 1H), 7.31 (dd,  $J$  = 5.2, 2.9 Hz, 1H), 7.40-7.48 (m, 3H), 7.99-8.02 (m, 2H).  $^{13}\text{C}\{^1\text{H}\}$  NMR (125 MHz,  $\text{CDCl}_3$ )  $\delta$ : 26.9, 122.1, 124.6, 126.07, 126.08, 127.6, 128.1, 128.7, 130.1, 136.6, 150.9, 161.2. HRMS (ESI):  $m/z$  calcd. for  $\text{C}_{14}\text{H}_{12}\text{NOS}^+$  [ $\text{M} + \text{H}$ ] $^+$  242.0634; found 242.0637.

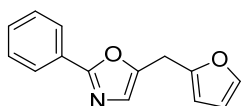

**5-(Furan-2-ylmethyl)-2-phenyloxazole (3bi):** MPLC (hexane/EtOAc = 90:10), 19.8 mg (44%). Colorless oil. IR (neat)  $\nu$   $\text{cm}^{-1}$ : 2958, 2925, 2853, 1599, 1550, 1506, 1448, 1150, 1121, 1102, 736, 691.  $^1\text{H}$  NMR (500 MHz,  $\text{CDCl}_3$ )  $\delta$ : 4.11 (s, 2H), 6.17 (d,  $J = 2.9$  Hz, 1H), 6.34 (dd,  $J = 2.9, 1.7$  Hz, 1H), 6.95 (s, 1H), 7.37 (d,  $J = 1.7$  Hz, 1H), 7.40-7.48 (m, 3H), 7.97-8.06 (m, 2H).  $^{13}\text{C}\{^1\text{H}\}$  NMR (125 MHz,  $\text{CDCl}_3$ )  $\delta$ : 25.2, 106.9, 110.5, 125.1, 126.1, 127.5, 128.7, 130.1, 141.9, 148.5, 150.0, 161.2. HRMS (ESI):  $m/z$  calcd. for  $\text{C}_{14}\text{H}_{12}\text{NO}_2^+$  [ $\text{M} + \text{H}$ ] $^+$  226.0863; found 226.0868.

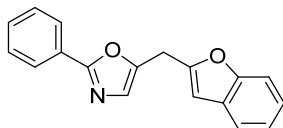

**5-(Benzofuran-2-ylmethyl)-2-phenyloxazole (3bj):** MPLC (hexane/EtOAc = 90:10), 27.5 mg (50%). Pale yellow solid, mp 62-64°C. IR (KBr)  $\nu$   $\text{cm}^{-1}$ : 2952, 2922, 2851, 1601, 1586, 1456, 1120, 1105, 1074, 764, 752, 711, 691.  $^1\text{H}$  NMR (500 MHz,  $\text{CDCl}_3$ )  $\delta$ : 4.27 (s, 2H), 6.56 (s, 1H), 7.05 (s, 1H), 7.21 (dd,  $J = 7.5, 6.9$  Hz, 1H), 7.24-7.29 (m, 1H), 7.41-7.49 (m, 4H), 7.52 (d,  $J = 7.5$  Hz, 1H), 7.98-8.07 (m, 2H).  $^{13}\text{C}\{^1\text{H}\}$  NMR (125 MHz,  $\text{CDCl}_3$ )  $\delta$ : 25.7, 104.0, 111.0, 120.6, 122.8, 123.9, 125.6, 126.2, 127.4, 128.5, 128.7, 130.2, 147.6, 153.1, 154.9, 161.5. HRMS (ESI):  $m/z$  calcd. for  $\text{C}_{18}\text{H}_{14}\text{NO}_2^+$  [ $\text{M} + \text{H}$ ] $^+$  276.1019; found 276.1025.

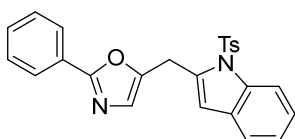

**2-Phenyl-5-[(1-tosyl-1H-indol-2-yl)methyl]oxazole (3bk) and 2-phenyl-5-[(1-tosyl-1H-indol-3-yl)methyl]oxazole (3bk')**: MPLC (hexane/EtOAc = 80:20), 11.6 mg (14%) and 29.6 mg (35%).

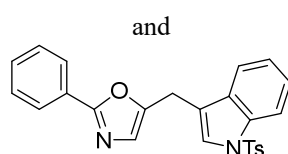

**3bk:** Yellow oil. IR (neat)  $\nu$   $\text{cm}^{-1}$ : 2924, 2853, 1597, 1567, 1484, 1450, 1370, 1175, 1121.  $^1\text{H}$  NMR (500 MHz,  $\text{CDCl}_3$ )  $\delta$ : 2.28 (s, 3H), 4.54 (s, 2H), 6.42 (s, 1H), 6.99 (s, 1H), 7.15 (d,  $J = 8.6$  Hz, 2H), 7.23 (ddd,  $J = 8.0, 6.9, 1.2$  Hz, 1H), 7.34 (ddd,  $J = 8.6, 6.9, 1.2$  Hz, 1H), 7.40-7.47 (m, 4H), 7.60 (d,  $J = 8.6$  Hz, 2H), 7.94-8.00 (m, 2H), 8.17 (dd,  $J = 8.6, 1.2$  Hz, 1H).  $^{13}\text{C}\{^1\text{H}\}$  NMR (125 MHz,  $\text{CDCl}_3$ )  $\delta$ : 21.5, 25.9, 111.0, 114.8, 120.6, 123.7, 124.5, 126.0, 126.1, 126.2, 127.4, 128.7, 129.2, 129.9, 130.2, 135.9, 136.2, 137.2, 144.9, 148.4, 161.3. HRMS (ESI):  $m/z$  calcd. for  $\text{C}_{25}\text{H}_{21}\text{N}_2\text{O}_3\text{S}^+$  [ $\text{M} + \text{H}$ ] $^+$  429.1267; found 429.1260.

**3bk':** Yellow oil. IR (neat)  $\nu$   $\text{cm}^{-1}$ : 2954, 2923, 2852, 1597, 1567, 1491, 1447, 1368, 117, 1119.  $^1\text{H}$  NMR (500 MHz,  $\text{CDCl}_3$ )  $\delta$ : 2.32 (s, 3H), 4.12 (s, 2H), 6.83 (s, 1H), 7.19 (d,  $J = 8.0$  Hz, 2H), 7.25 (dd,  $J = 8.0, 7.5$  Hz, 1H), 7.34 (dd,  $J = 8.0, 7.5$  Hz, 1H), 7.41-7.47 (m, 3H), 7.48 (s, 1H), 7.51 (d,  $J = 8.0$  Hz, 1H), 7.75 (d,  $J = 8.0$  Hz, 2H), 7.95-7.99 (m, 2H), 8.01 (d,  $J = 8.0$  Hz, 1H).  $^{13}\text{C}\{^1\text{H}\}$  NMR (125 MHz,  $\text{CDCl}_3$ )  $\delta$ : 21.5, 22.0, 113.8, 117.8, 119.4, 123.3, 124.2, 124.9, 125.0, 126.1, 126.7, 127.5, 128.7, 129.8, 130.2, 135.1, 135.3, 144.9, 149.7, 161.2 (note that two carbon peaks overlap with each other). HRMS (ESI):  $m/z$  calcd. for  $\text{C}_{25}\text{H}_{21}\text{N}_2\text{O}_3\text{S}^+$  [ $\text{M} + \text{H}$ ] $^+$  429.1267; found 429.1266.

## 4. Control Experiments

### (a) Time course of reaction of **1a** with **2a** (Figure 1)

To a solution of *N*-propargyl carboxamide **1a** (40.8 mg, 0.2 mmol), 2,4-(OMe)<sub>2</sub>-6-(COOMe)C<sub>6</sub>H<sub>2</sub>I (12.9 mg, 0.04 mmol) and dibenzyl sulfoxide (50.7 mg, 0.22 mmol) in MeNO<sub>2</sub> (2.0 mL) were added mesitylene (**2a**, 83.5  $\mu\text{L}$ , 0.6 mmol) and *p*-NsCl (48.8 mg, 0.22 mmol). After being stirred at 100 °C for 1 h, the reaction mixture was filtered through a short silica gel column using ethyl acetate. The filtrate was concentrated in vacuo to dryness, and then the  $^1\text{H}$  NMR spectrum (300 MHz,  $\text{CDCl}_3$ ) of the residue was measured, using dibromomethane (20  $\mu\text{L}$ ) as an internal standard. The yields of **3aa** ( $\delta = 4.06$  ppm), **4a** ( $\delta = 2.44$  ppm), **5a** ( $\delta = 3.68$  and 3.77 ppm) and **6a** ( $\delta = 4.45$  ppm) were determined from the obtained spectrum. The same procedure was followed for reaction times of 8, 15 and 24 h.

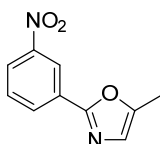

**5-Methyl-2-(3-nitrophenyl)oxazole (4a):**  $R_f = 0.54$  (hexane:AcOEt = 2:1). Brown solid.  $^1\text{H}$ -NMR (300 MHz,  $\text{CDCl}_3$ )  $\delta$  ppm; 2.43 (s, 3H), 6.90 (s, 1H), 7.63 (dd,  $J = 8.2, 7.8$  Hz, 1H), 8.25 (ddd,  $J = 8.2, 2.0, 1.1$  Hz, 1H), 8.32 (ddd,  $J = 7.8, 2.0, 1.1$  Hz, 1H), 8.82 (t,  $J = 2.0$  Hz, 1H).  $^{13}\text{C}$ -NMR (75 MHz,  $\text{CDCl}_3$ )  $\delta$  ppm; 10.9, 120.8, 124.2, 124.9, 129.4, 129.9, 131.5, 148.7, 150.3, 158.5. The  $^1\text{H}$  and  $^{13}\text{C}$  NMR spectra of **4a** were identical to data reported in the literature.<sup>4</sup>

<sup>4</sup> G. C. Senadi, W.-P. Hu, J.-S. Hsiao, J. K. Vandavasi, C.-Y. Chen, J.-J. Wang, *Org. Lett.* **2012**, *14*, 4478–4481.

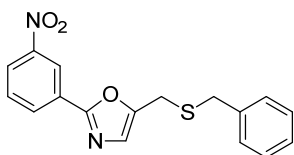

**5-[(Benzylthio)methyl]-2-(3-nitrophenyl)oxazole (6a):**  $R_f = 0.48$  (hexane: AcOEt = 2:1). pale yellow solid, mp 91-96. IR (KBr)  $\nu$   $\text{cm}^{-1}$ : 2931, 2912, 2862, 1595, 1580, 1547, 1526, 1496, 1456, 1346, 1140, 1119, 1105, 1071.  $^1\text{H}$  NMR (500 MHz,  $\text{CDCl}_3$ )  $\delta$ : 3.68 (s, 2H), 3.77 (s, 2H), 7.01 (s, 1H), 7.23-7.29 (m, 1H), 7.31-7.38 (m, 4H), 7.65 (dd,  $J = 8.0$ , 8.0 Hz, 1H), 7.28 (dd,  $J = 8.0$  Hz, 1.7 Hz, 1H), 8.33 (d,  $J = 8.0$  Hz, 1H), 8.83 (d,  $J = 1.7$  Hz, 1H).  $^{13}\text{C}$   $\{^1\text{H}\}$  NMR (125 MHz,  $\text{CDCl}_3$ )  $\delta$ : 24.9, 36.0, 121.0, 124.6, 126.2, 127.3, 128.6, 128.9, 129.9, 131.6, 137.1, 148.5, 150.1, 159.2 (note that two carbon peaks overlap with each other). HRMS (ESI):  $m/z$  calcd. for  $\text{C}_{17}\text{H}_{15}\text{N}_2\text{O}_3\text{S}^+$   $[\text{M} + \text{H}]^+$  327.0798; found 327.0805.

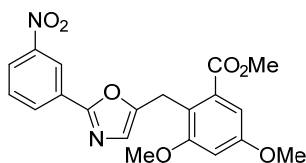

**Methyl 3,5-dimethoxy-2-([2-(3-nitrophenyl)oxazol-5-yl]methyl)benzoate (7a):**  $R_f = 0.26$  (hexane: AcOEt = 2:1). yellow, sticky solid. IR (KBr)  $\nu$   $\text{cm}^{-1}$ : 2950, 2841, 1604, 1583, 1547, 1526, 1459, 1435, 1353, 1322, 1298, 1280, 1244, 1213, 1205, 1189, 1164, 1136, 1121, 1104, 1065.  $^1\text{H}$  NMR (500 MHz,  $\text{CDCl}_3$ )  $\delta$ : 3.85 (s, 3H), 3.86 (s, 3H), 3.92 (s, 3H), 4.46 (s, 2H), 6.66 (d,  $J = 2.3$  Hz, 1H), 6.73 (s, 1H), 7.03 (d,  $J = 2.3$  Hz, 1H), 7.60 (dd,  $J = 8.0$ , 8.0 Hz, 1H), 8.23 (dd,  $J = 8.0$ , 2.3 Hz, 1H), 8.29 (d,  $J = 8.0$  Hz, 1H), 8.78 (d,  $J = 2.3$  Hz, 1H).  $^{13}\text{C}$   $\{^1\text{H}\}$  NMR (125 MHz,  $\text{CDCl}_3$ )  $\delta$ : 22.2, 52.3, 55.5, 55.9, 102.4, 105.8, 118.5, 120.7, 124.0, 124.4, 129.5, 129.8, 131.4, 131.7, 148.5, 153.4, 158.0, 158.9, 159.3, 167.7. HRMS (ESI):  $m/z$  calcd. for  $\text{C}_{20}\text{H}_{19}\text{N}_2\text{O}_7^+$   $[\text{M} + \text{H}]^+$  399.1187; found 399.1195.

(b) Reaction of **1a** with BnSH under the optimized conditions (Scheme 4a)

To a solution of *N*-propargyl carboxamide **1a** (40.8 mg, 0.2 mmol), 2,4-(OMe)<sub>2</sub>-6-(COOMe)C<sub>6</sub>H<sub>2</sub>I (12.9 mg, 0.04 mmol) and dibenzyl sulfoxide (50.7 mg, 0.22 mmol) in MeNO<sub>2</sub> (2.0 mL) were added BnSH (117.2  $\mu\text{L}$ , 1.0 mmol) and *p*-NsCl (48.8 mg, 0.22 mmol). After being stirred at 100 °C for 24 h, the reaction mixture was filtered through a short silica gel column using ethyl acetate. The filtrate was concentrated in vacuo to dryness, and then the  $^1\text{H}$  NMR spectrum (300 MHz,  $\text{CDCl}_3$ ) of the residue was measured, using dibromomethane (20  $\mu\text{L}$ ) as an internal standard. The yields of **3aa** ( $\delta = 4.06$  ppm), **4a** ( $\delta = 2.44$  ppm), **5a** ( $\delta = 3.68$  and 3.77 ppm) and **6a** ( $\delta = 4.45$  ppm) were determined from the obtained spectrum.

(c) Reaction of **6a** with **2a** under the optimized conditions (Scheme 4b)

To a solution of *N*-propargyl carboxamide **6a** (20.4 mg, 0.1 mmol), 2,4-(OMe)<sub>2</sub>-6-(COOMe)C<sub>6</sub>H<sub>2</sub>I (6.4 mg, 0.02 mmol) and dibenzyl sulfoxide (25.3 mg, 0.11 mmol) in MeNO<sub>2</sub> (1.0 mL) were added mesitylene (**2a**, 69.1  $\mu\text{L}$ , 0.5 mmol) and *p*-NsCl (24.4 mg, 0.11 mmol). After being stirred at 100 °C for 24 h, the reaction mixture was filtered through a short silica gel column using ethyl acetate. The filtrate was concentrated in vacuo to dryness, and then the  $^1\text{H}$  NMR spectrum (300 MHz,  $\text{CDCl}_3$ ) of the residue was measured, using dibromomethane (20  $\mu\text{L}$ ) as an internal standard. The yields of **3aa** ( $\delta = 4.06$  ppm), **4a** ( $\delta = 2.44$  ppm), **5a** ( $\delta = 3.68$  and 3.77 ppm) and **6a** ( $\delta = 4.45$  ppm) were determined from the obtained spectrum.

## 5. $^1\text{H}$ and $^{13}\text{C}$ NMR Spectra of 3aa-3ja, 3bb-3bj, 4a, 5a and 6a

$^1\text{H}$  NMR (500 MHz,  $\text{CDCl}_3$ ) of 3aa

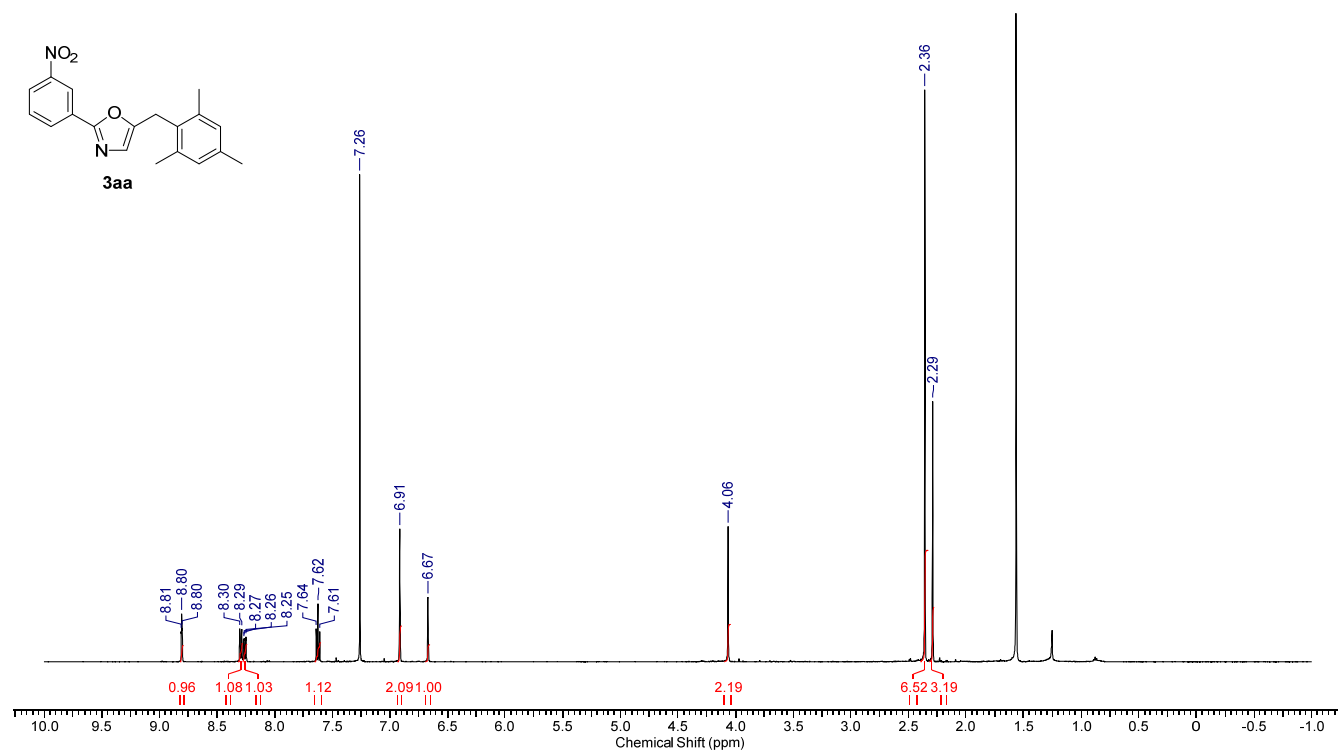

$^{13}\text{C}$  NMR (125 MHz,  $\text{CDCl}_3$ ) of 3aa

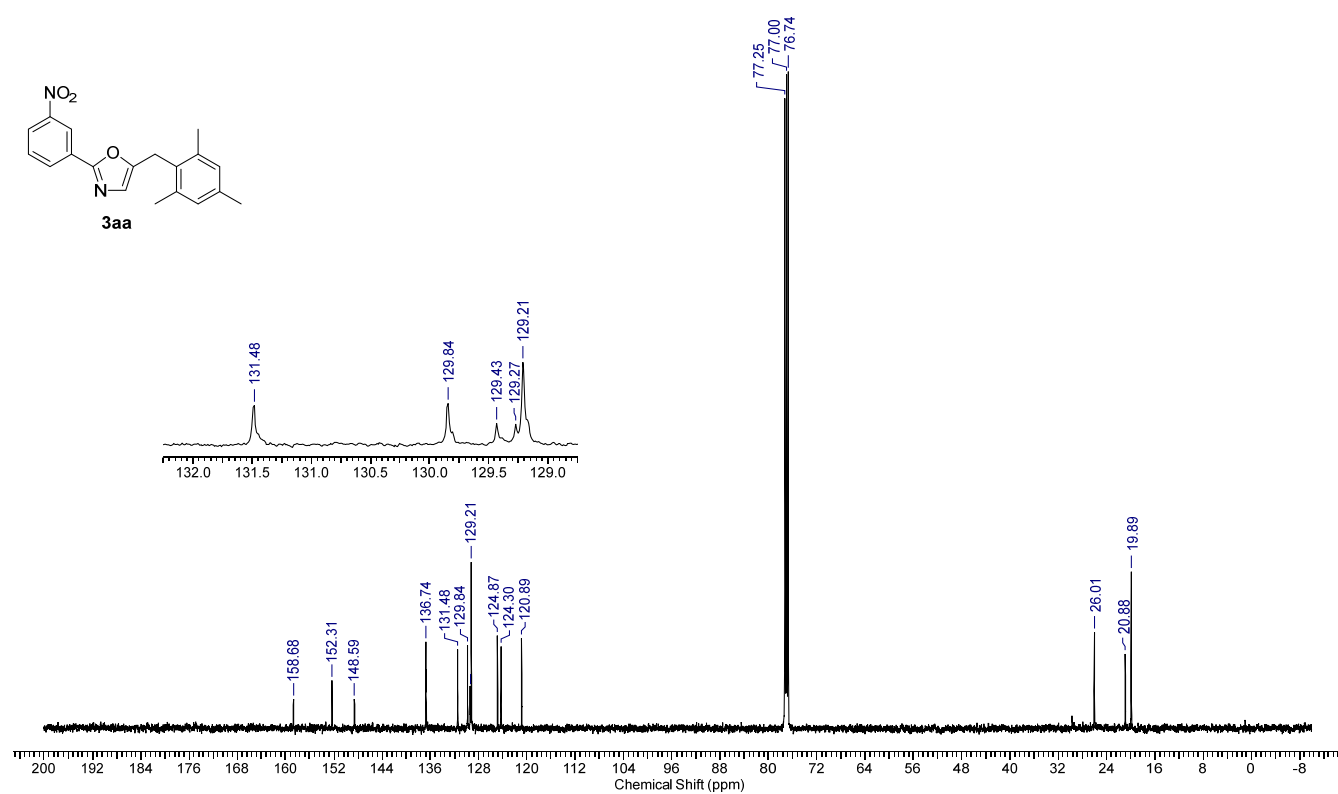

<sup>1</sup>H NMR (500 MHz, CDCl<sub>3</sub>) of **3ba**

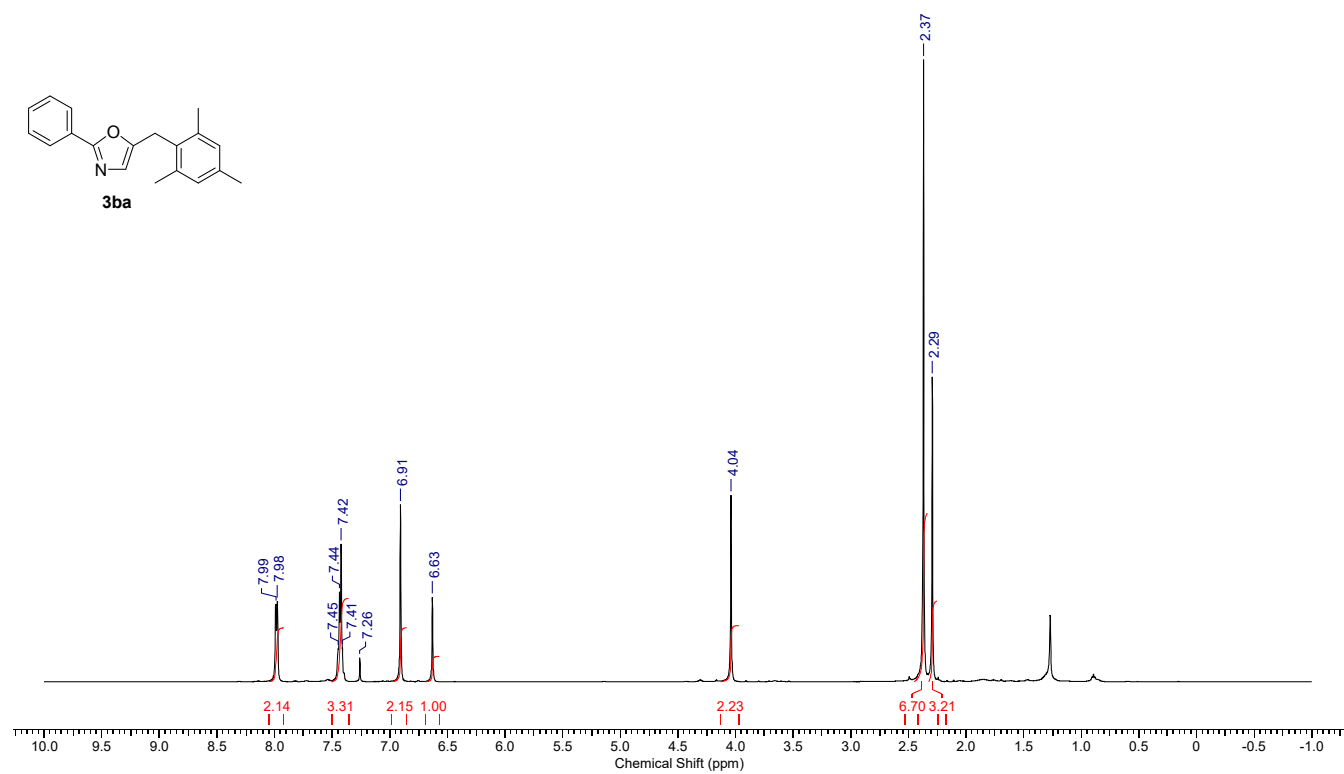

<sup>13</sup>C NMR (125 MHz, CDCl<sub>3</sub>) of **3ba**

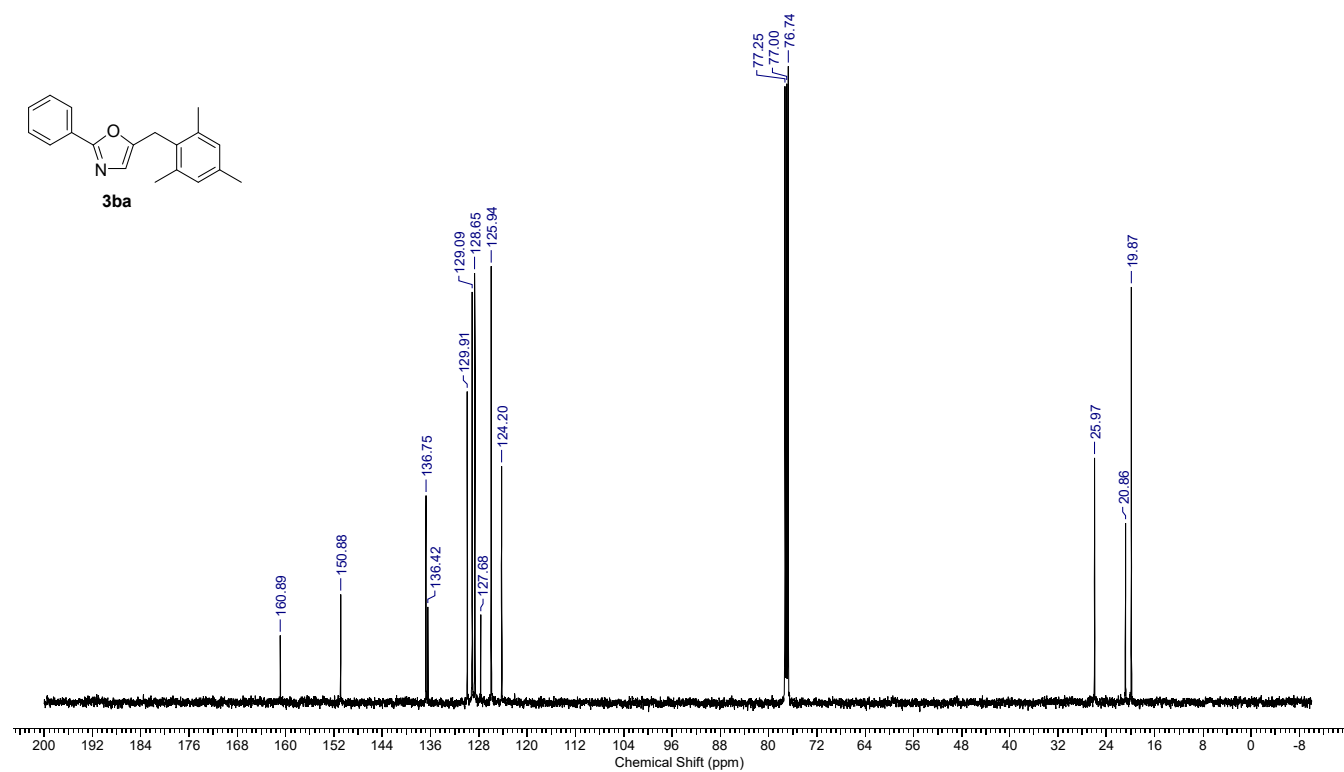

<sup>1</sup>H NMR (500 MHz, CDCl<sub>3</sub>) of **3ca**

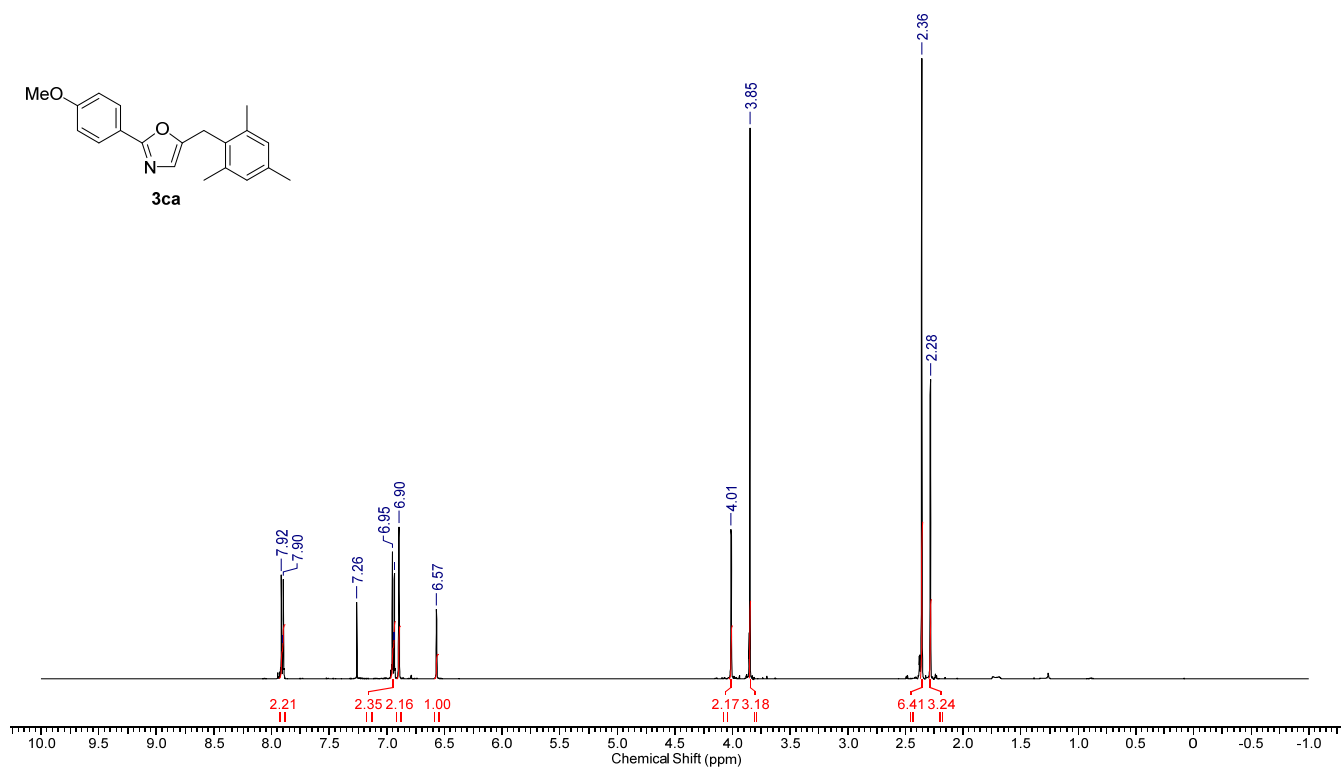

<sup>13</sup>C NMR (125 MHz, CDCl<sub>3</sub>) of **3ca**

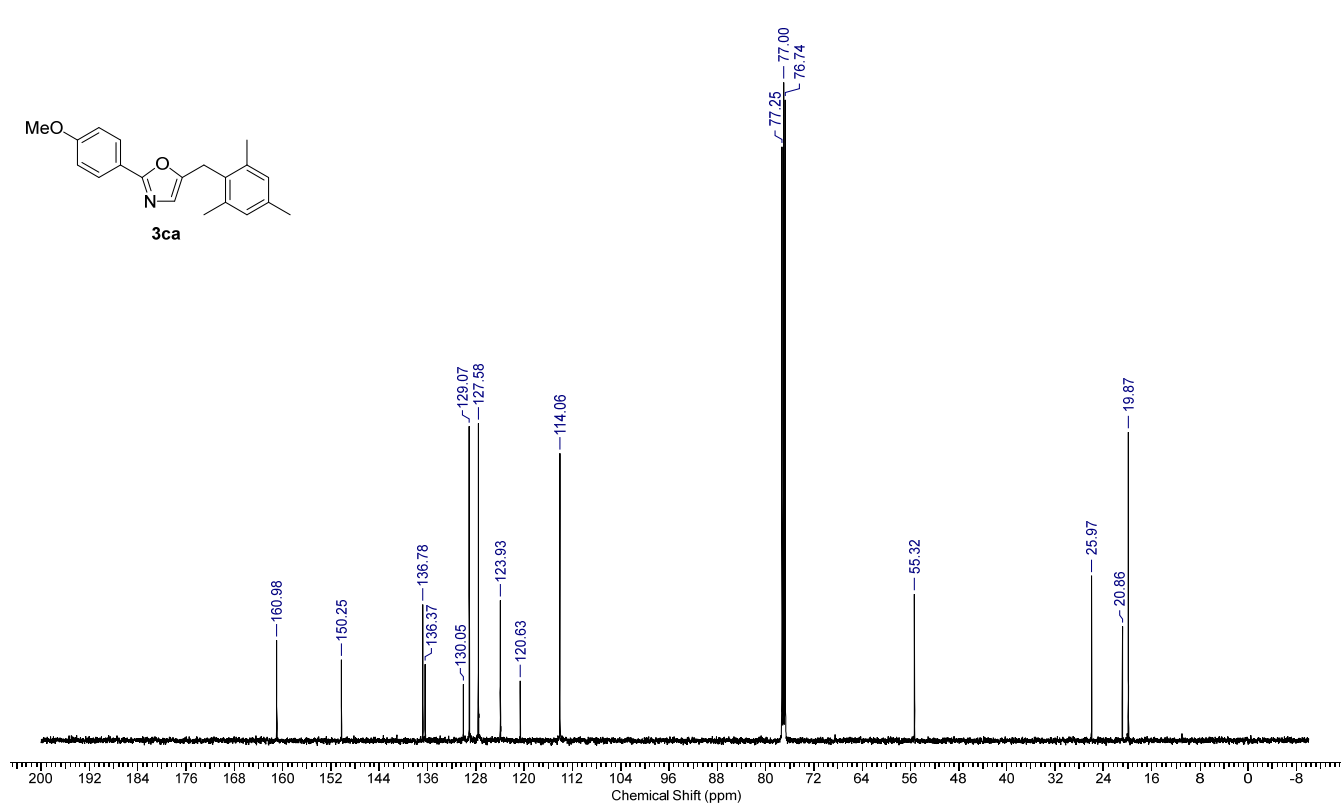

<sup>1</sup>H NMR (500 MHz, CDCl<sub>3</sub>) of **3da**

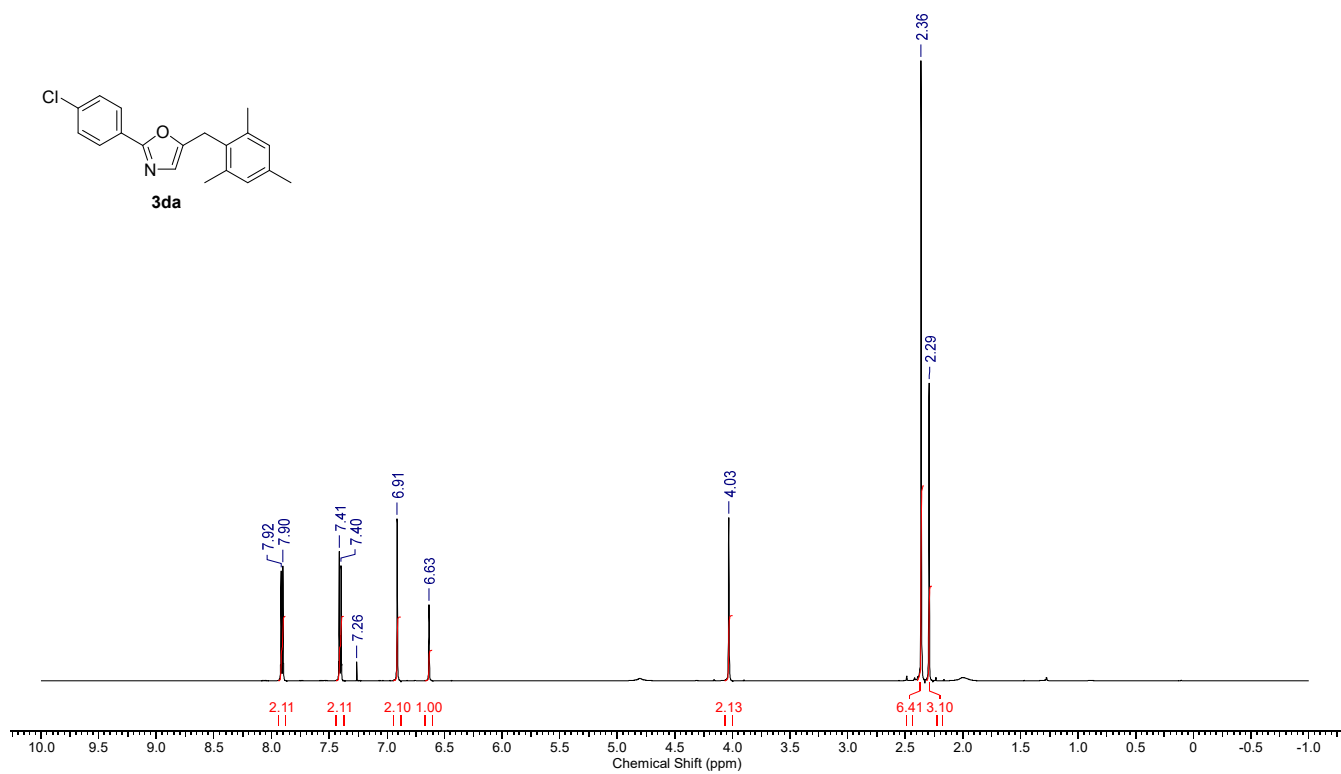

<sup>13</sup>C NMR (125 MHz, CDCl<sub>3</sub>) of **3da**

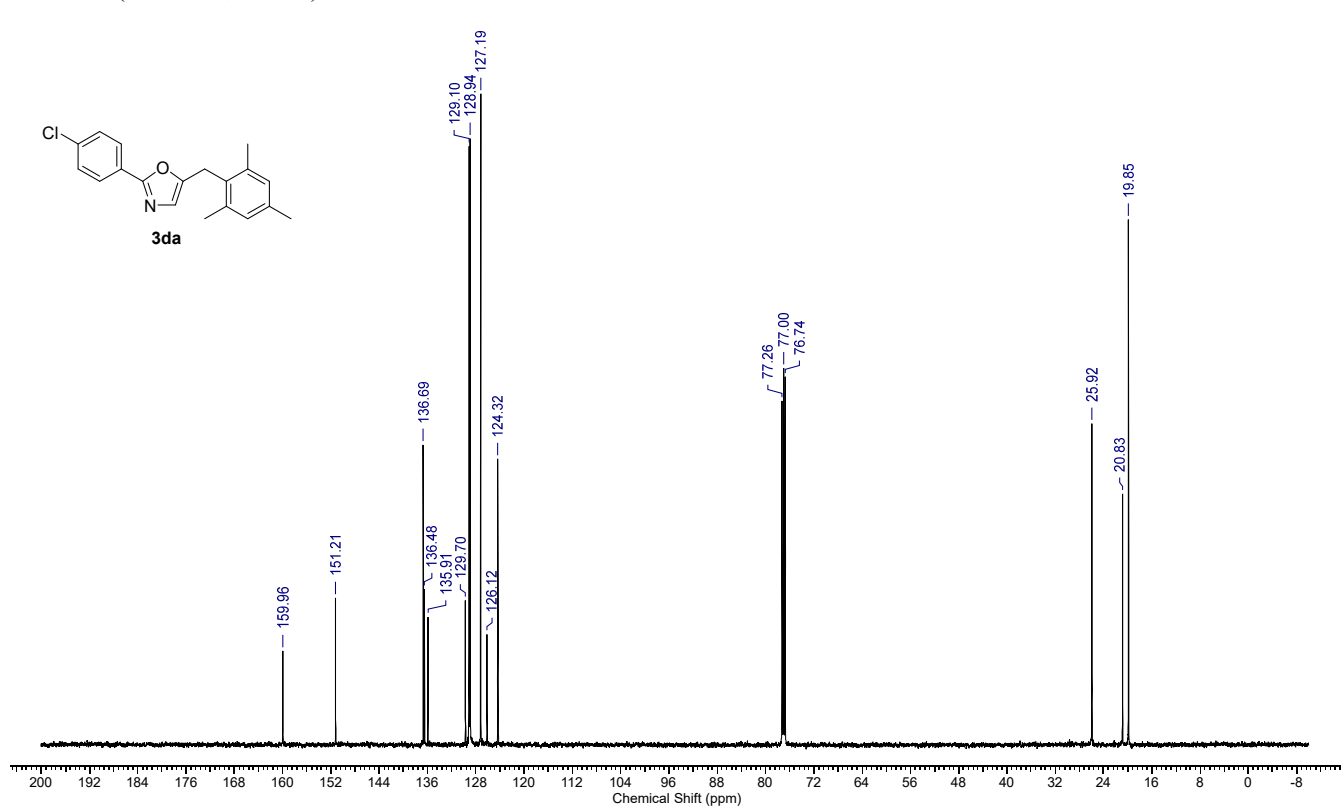

<sup>1</sup>H NMR (500 MHz, CDCl<sub>3</sub>) of **3ea**

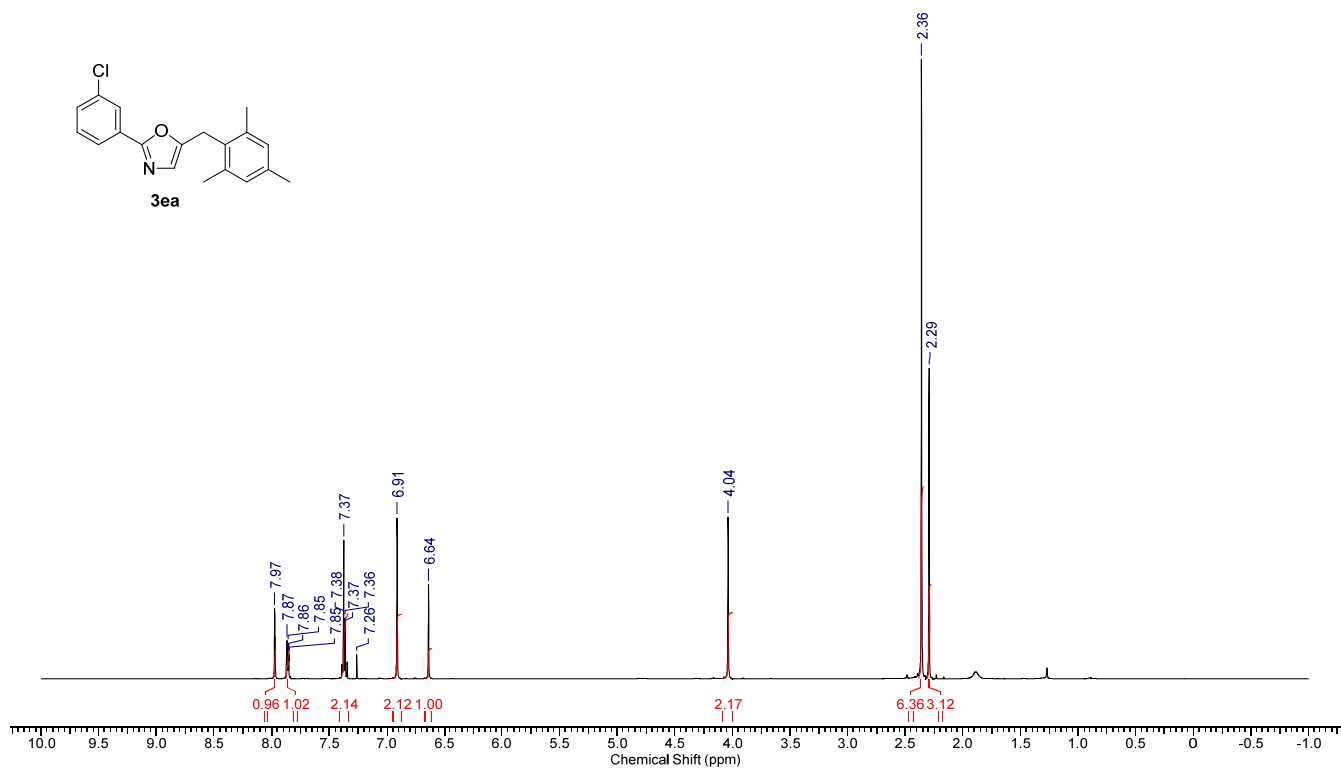

<sup>13</sup>C NMR (125 MHz, CDCl<sub>3</sub>) of **3ea**

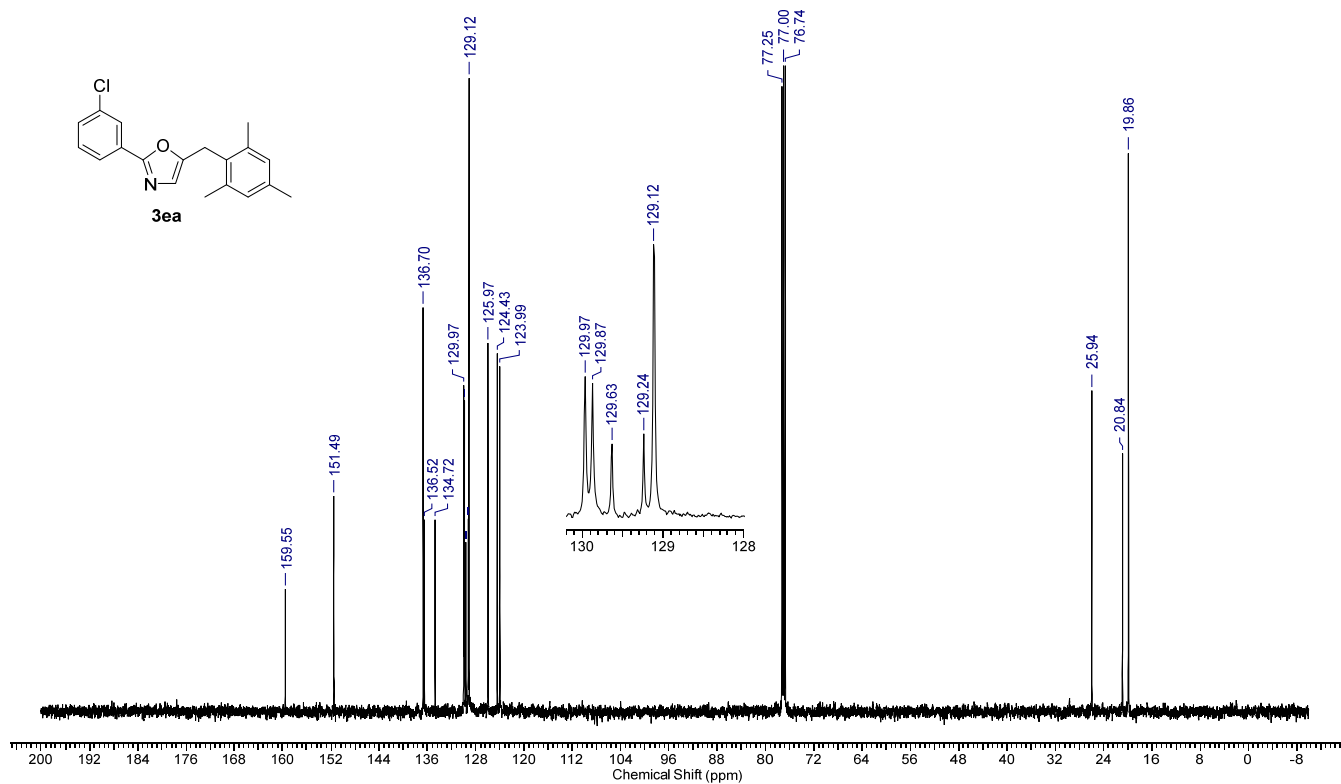

<sup>1</sup>H NMR (500 MHz, CDCl<sub>3</sub>) of **3fa**

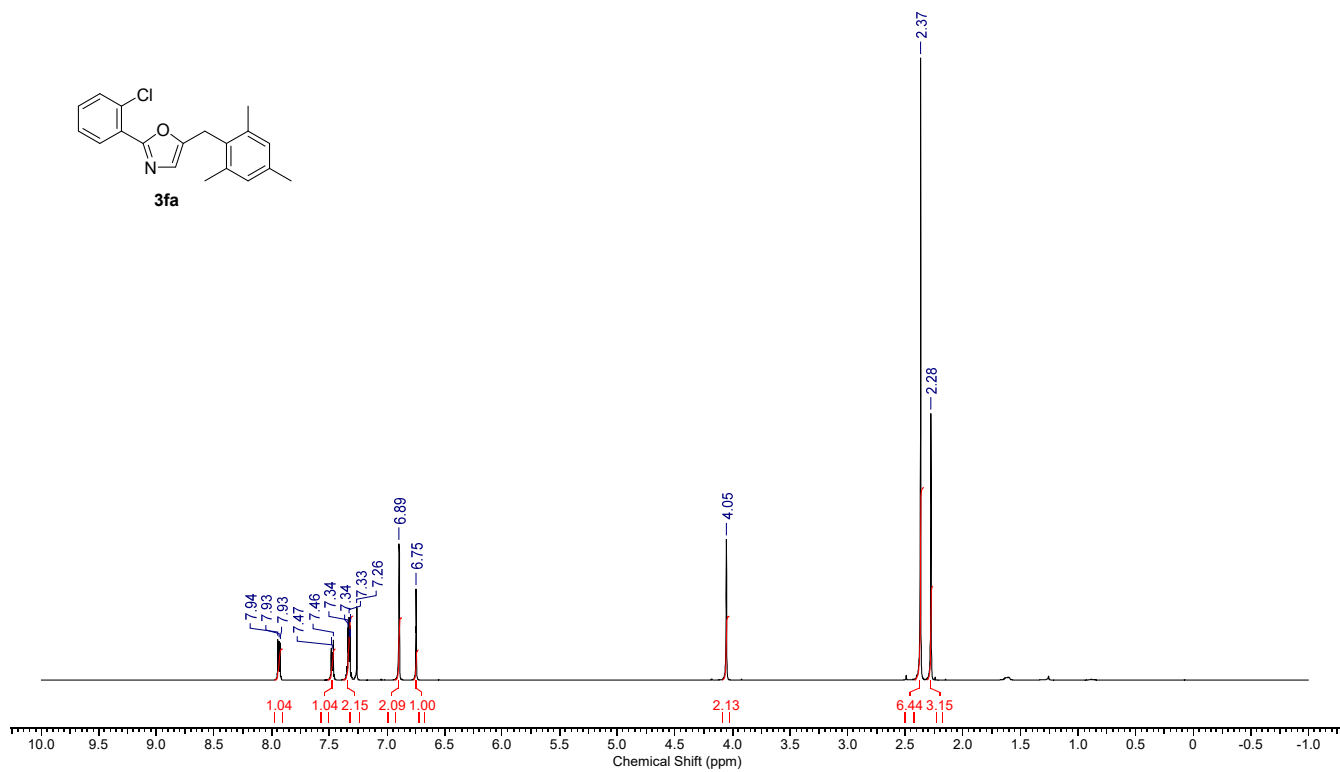

<sup>13</sup>C NMR (125 MHz, CDCl<sub>3</sub>) of **3fa**

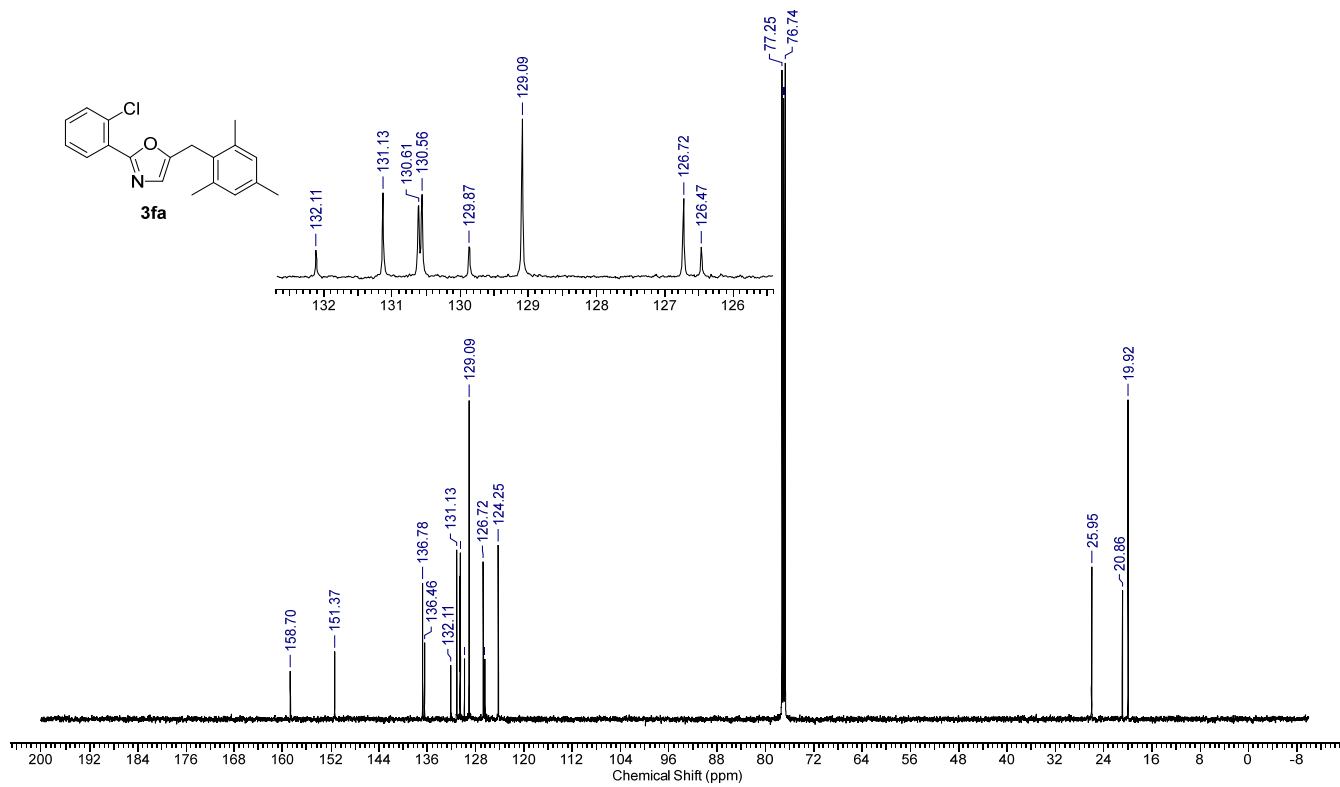

<sup>1</sup>H NMR (500 MHz, CDCl<sub>3</sub>) of **3ga**

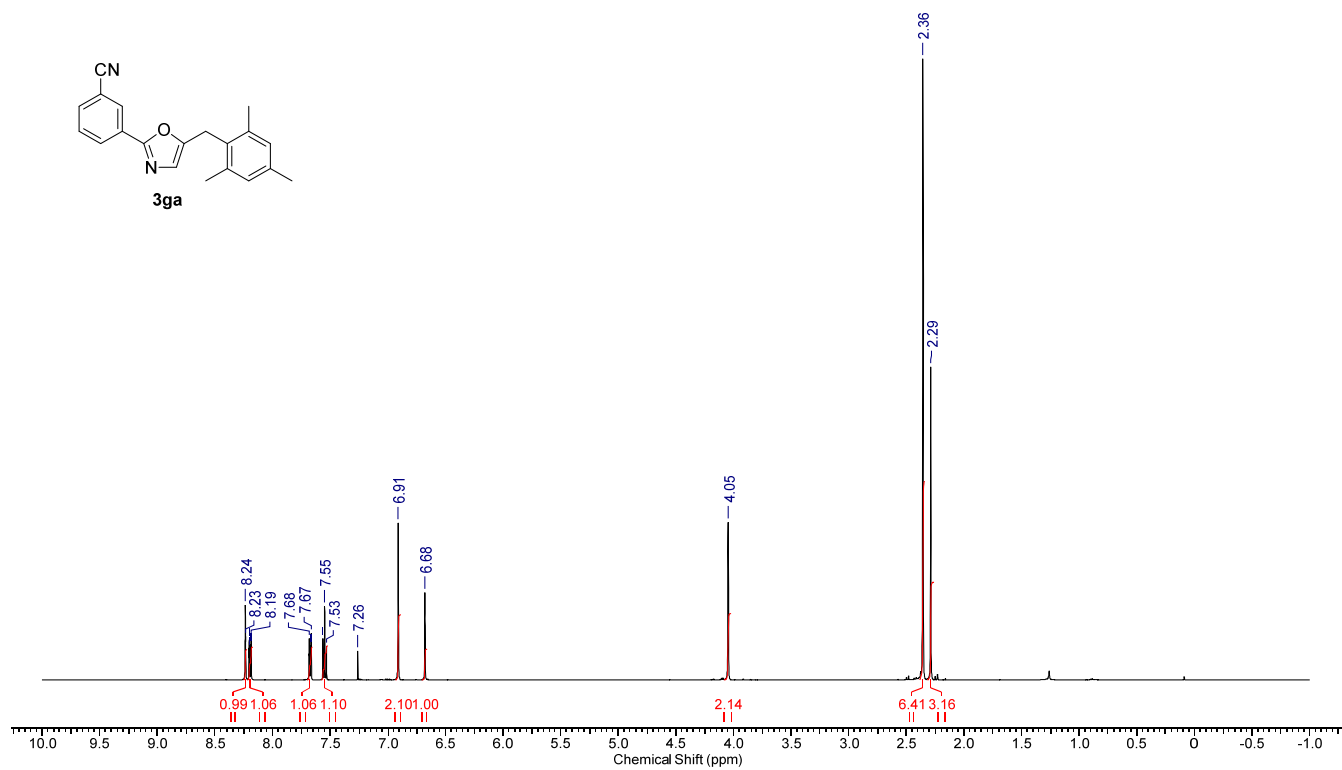

<sup>13</sup>C NMR (125 MHz, CDCl<sub>3</sub>) of **3ga**

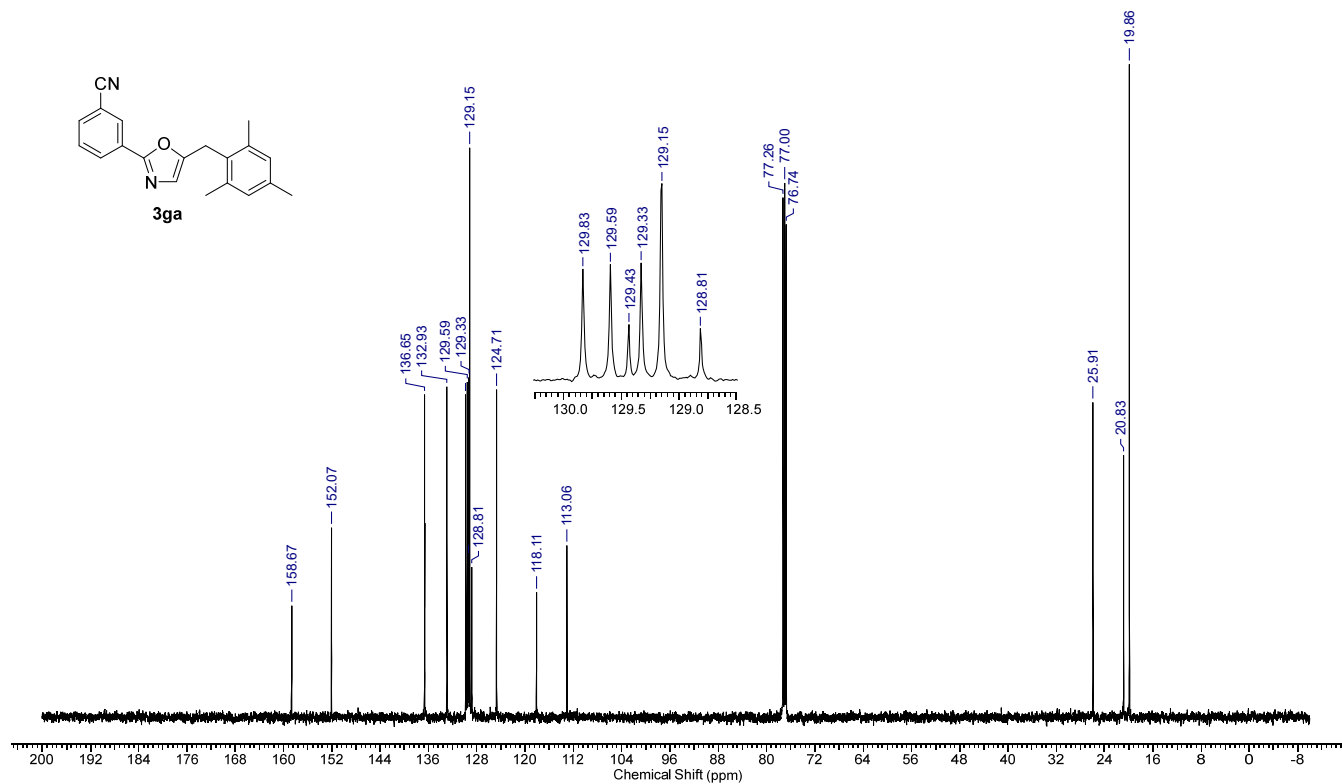

<sup>1</sup>H NMR (500 MHz, CDCl<sub>3</sub>) of **3ha**

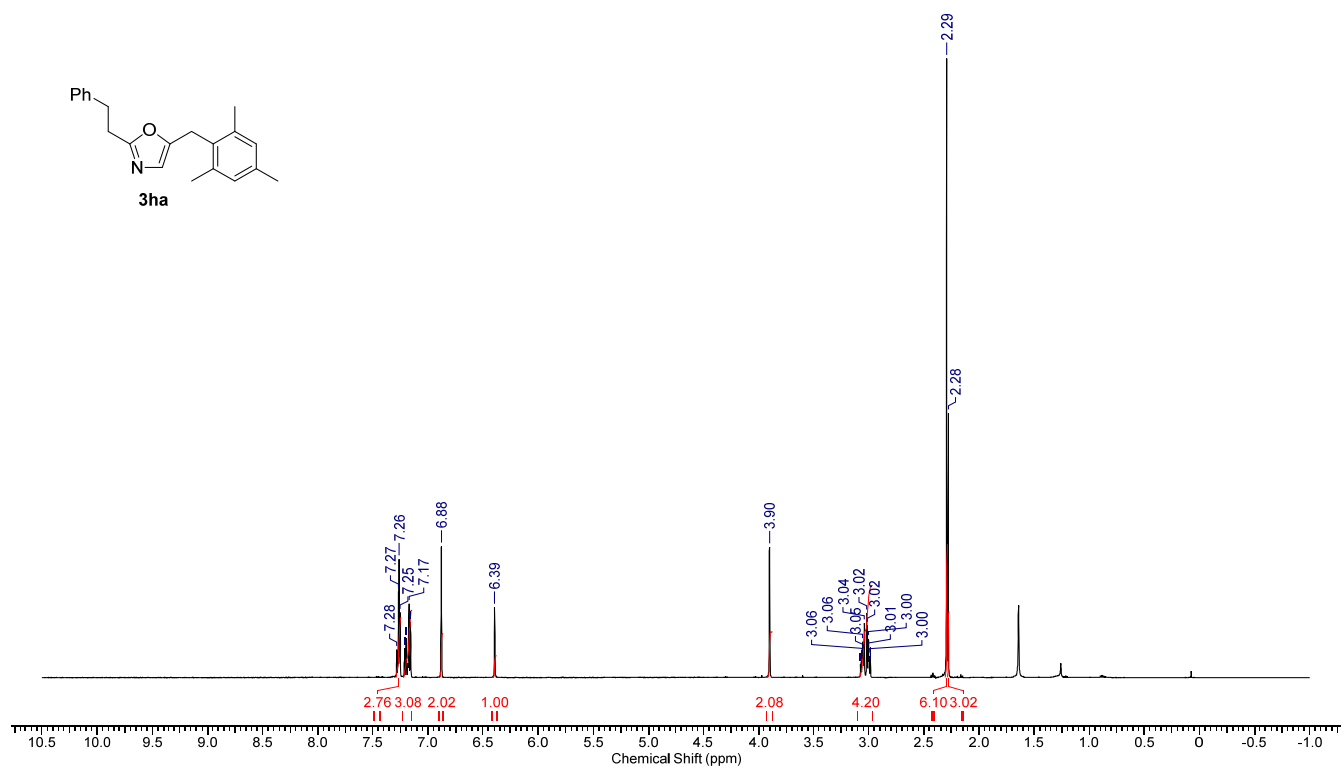

<sup>13</sup>C NMR (125 MHz, CDCl<sub>3</sub>) of **3ha**

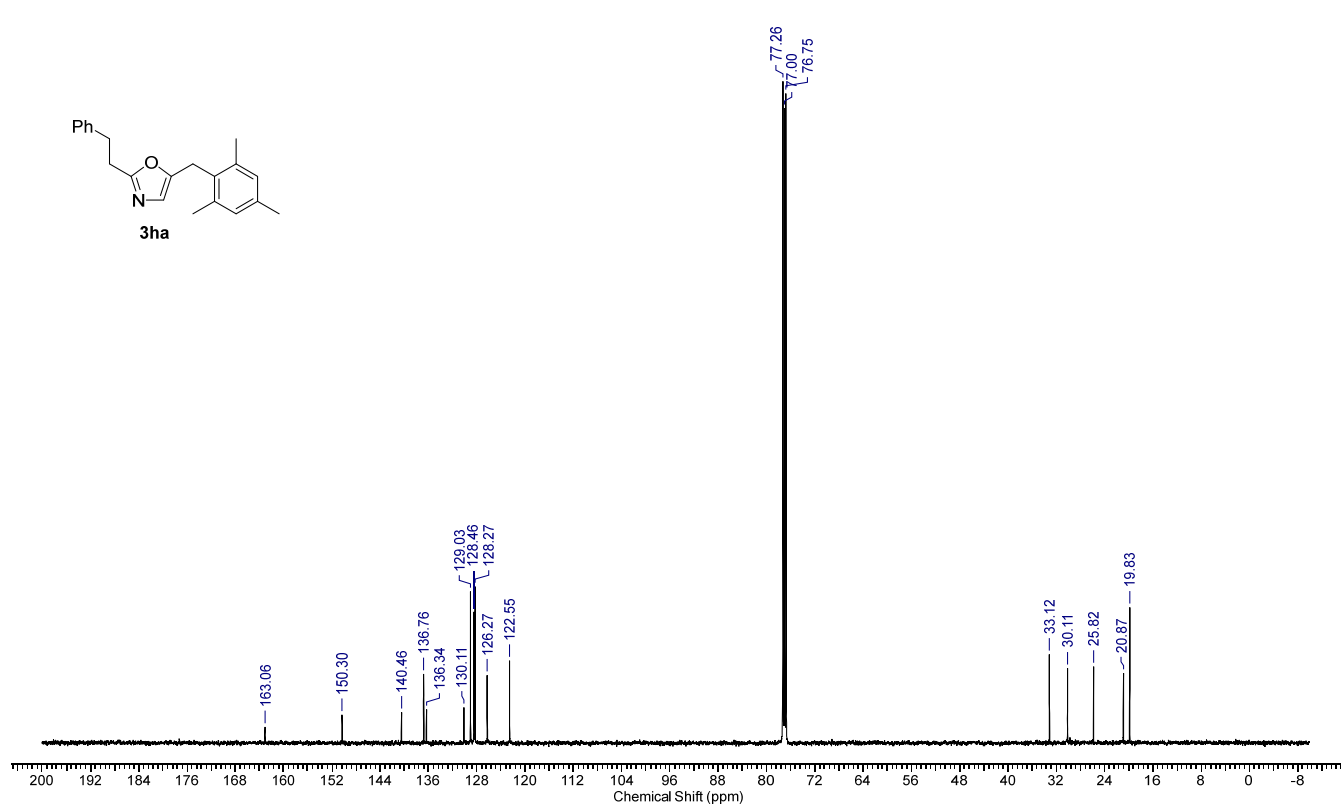

<sup>1</sup>H NMR (500 MHz, CDCl<sub>3</sub>) of **3ia**

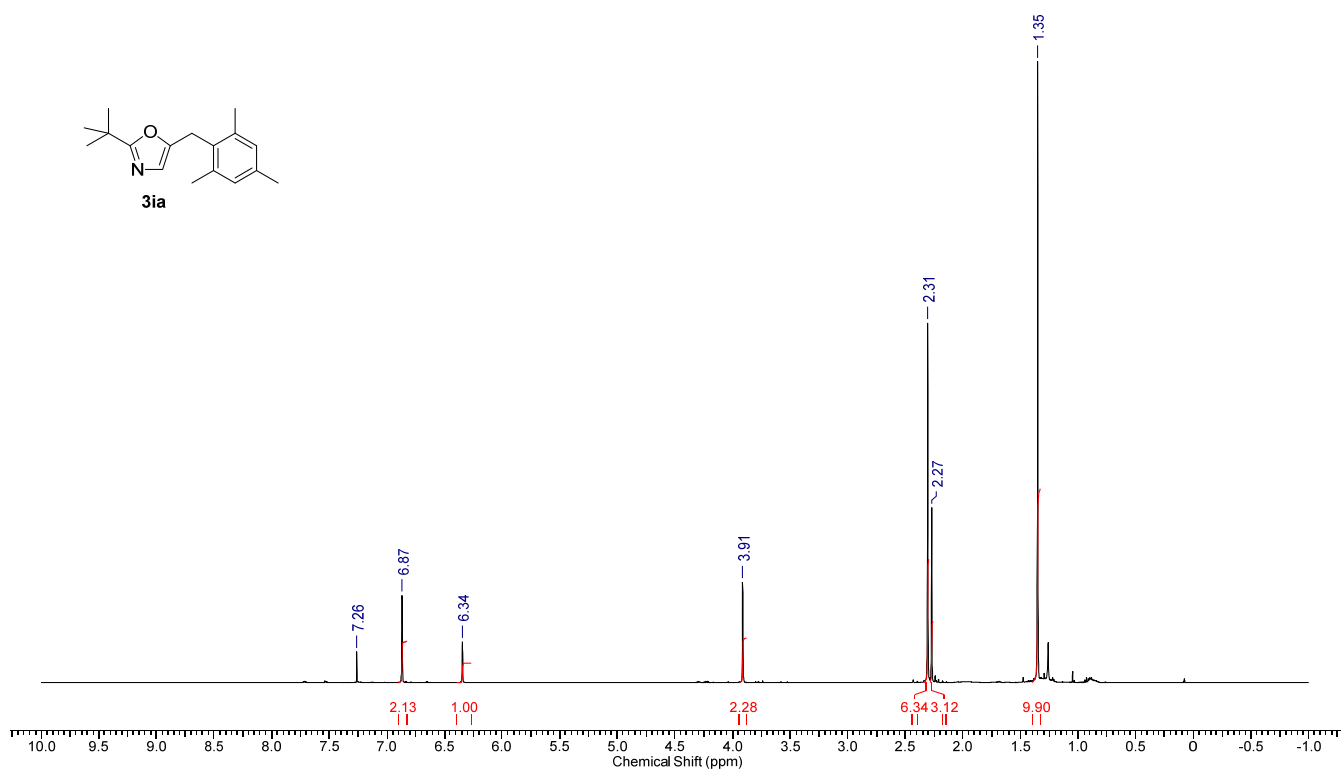

<sup>13</sup>C NMR (125 MHz, CDCl<sub>3</sub>) of **3ia**

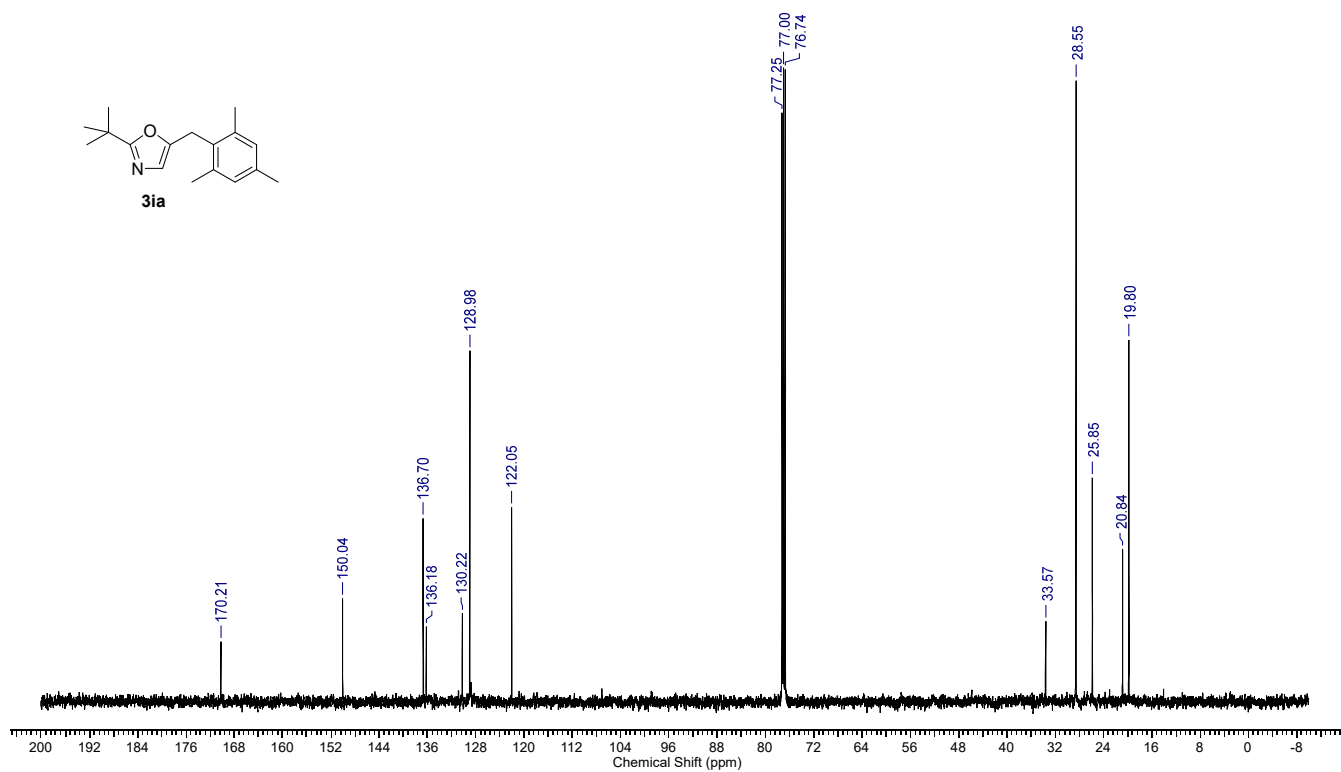

<sup>1</sup>H NMR (500 MHz, CDCl<sub>3</sub>) of **3ja**

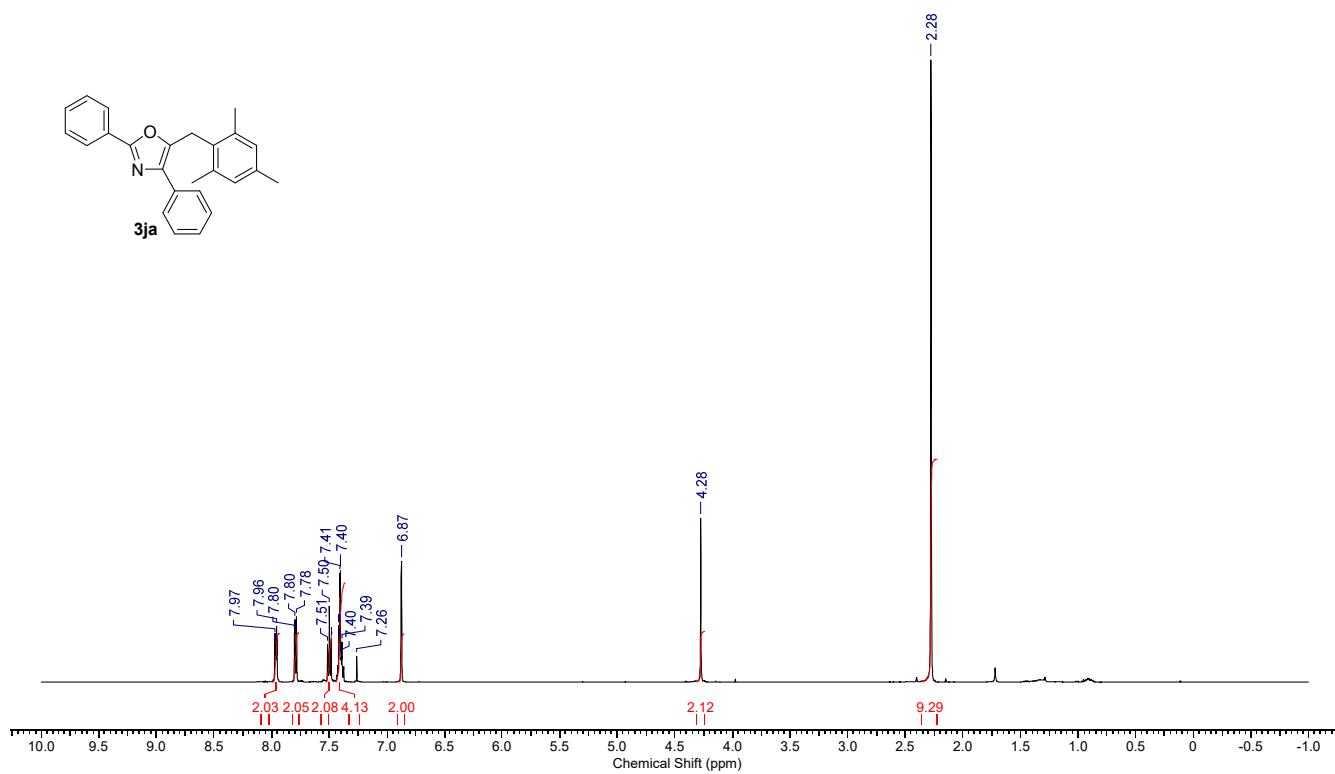

<sup>13</sup>C NMR (125 MHz, CDCl<sub>3</sub>) of **3ja**

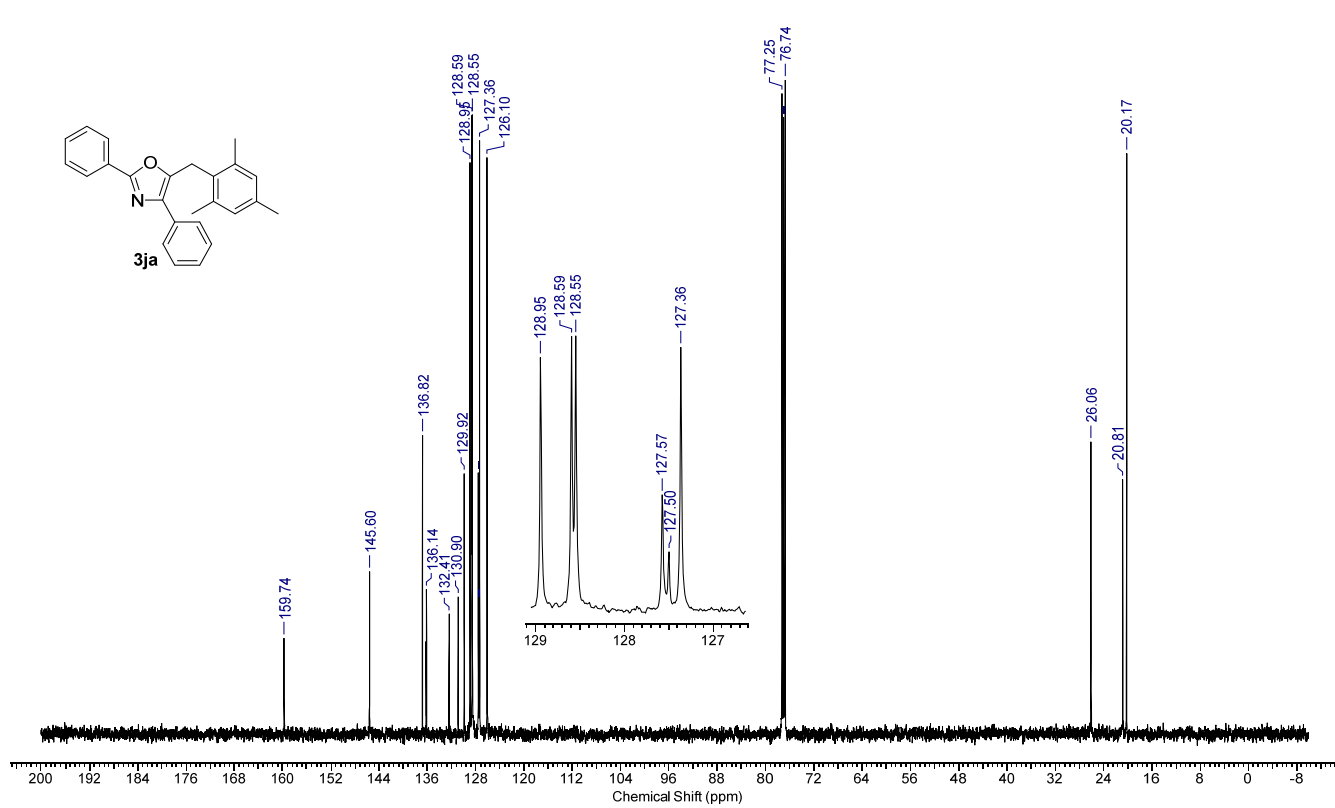

<sup>1</sup>H NMR (500 MHz, CDCl<sub>3</sub>) of **3bb**

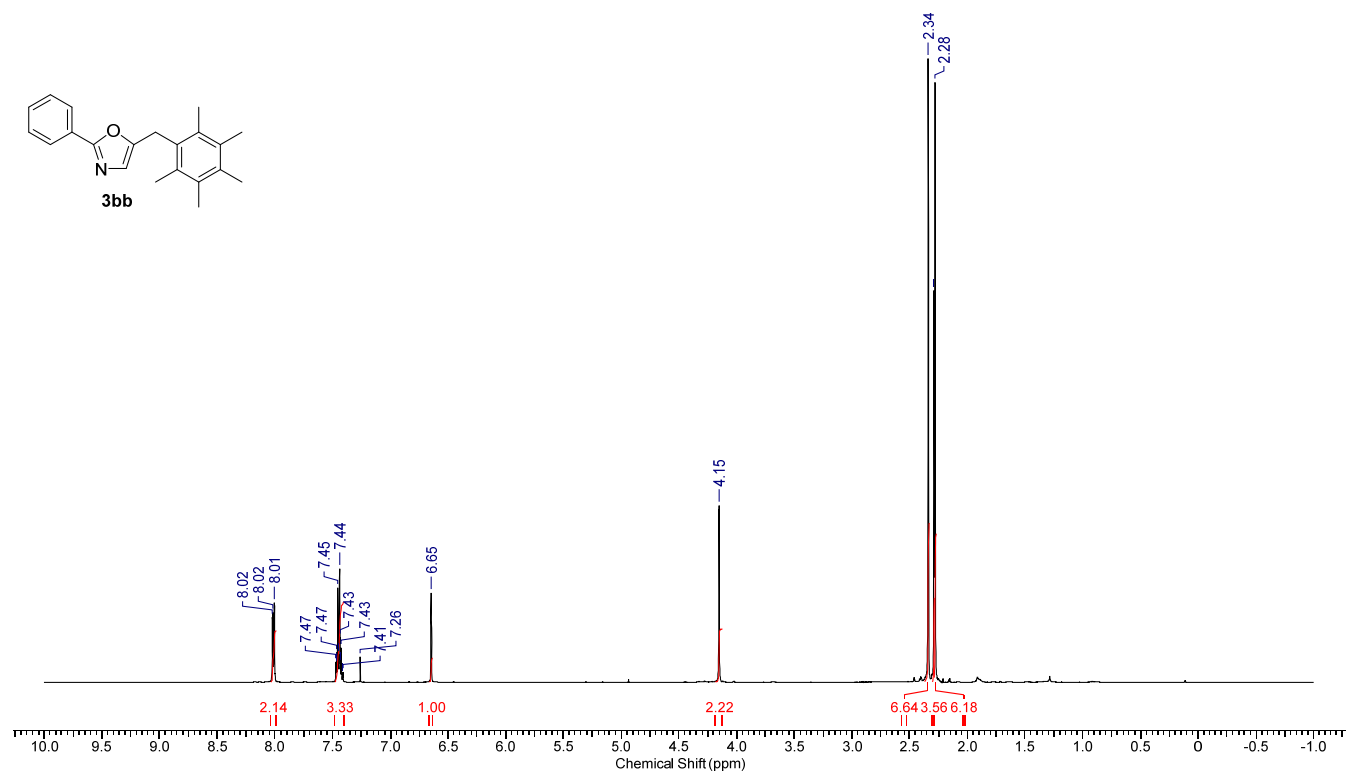

<sup>13</sup>C NMR (125 MHz, CDCl<sub>3</sub>) of **3bb**

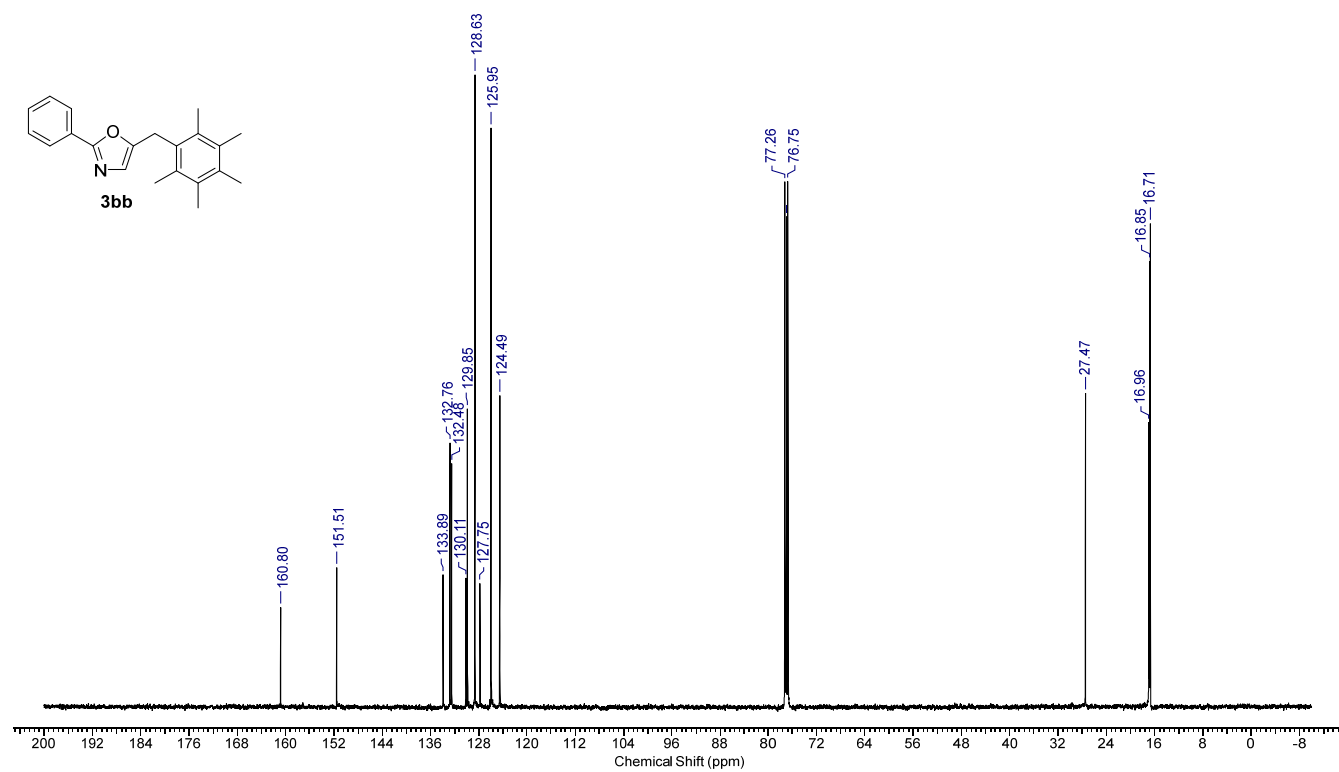

$^1\text{H}$  NMR (500 MHz,  $\text{CDCl}_3$ ) of **3bc**

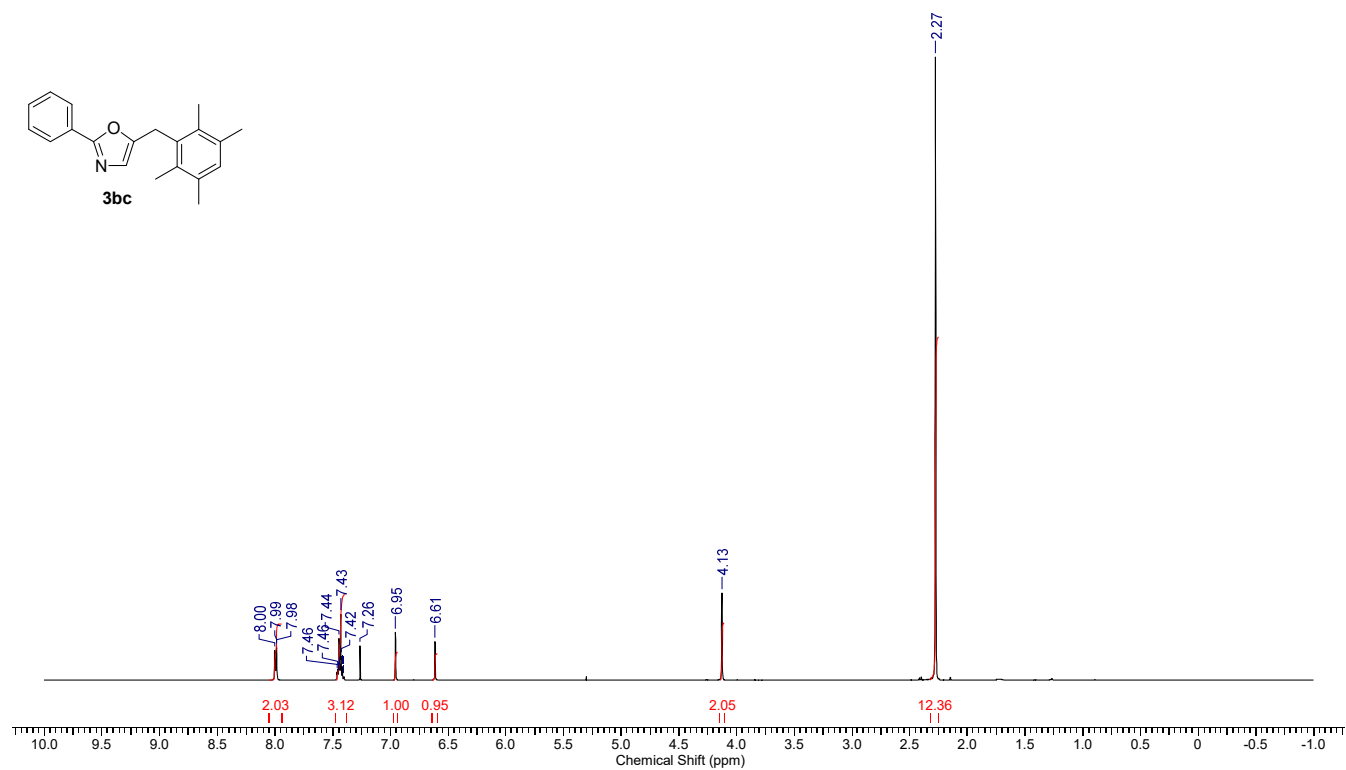

$^{13}\text{C}$  NMR (125 MHz,  $\text{CDCl}_3$ ) of **3bc**

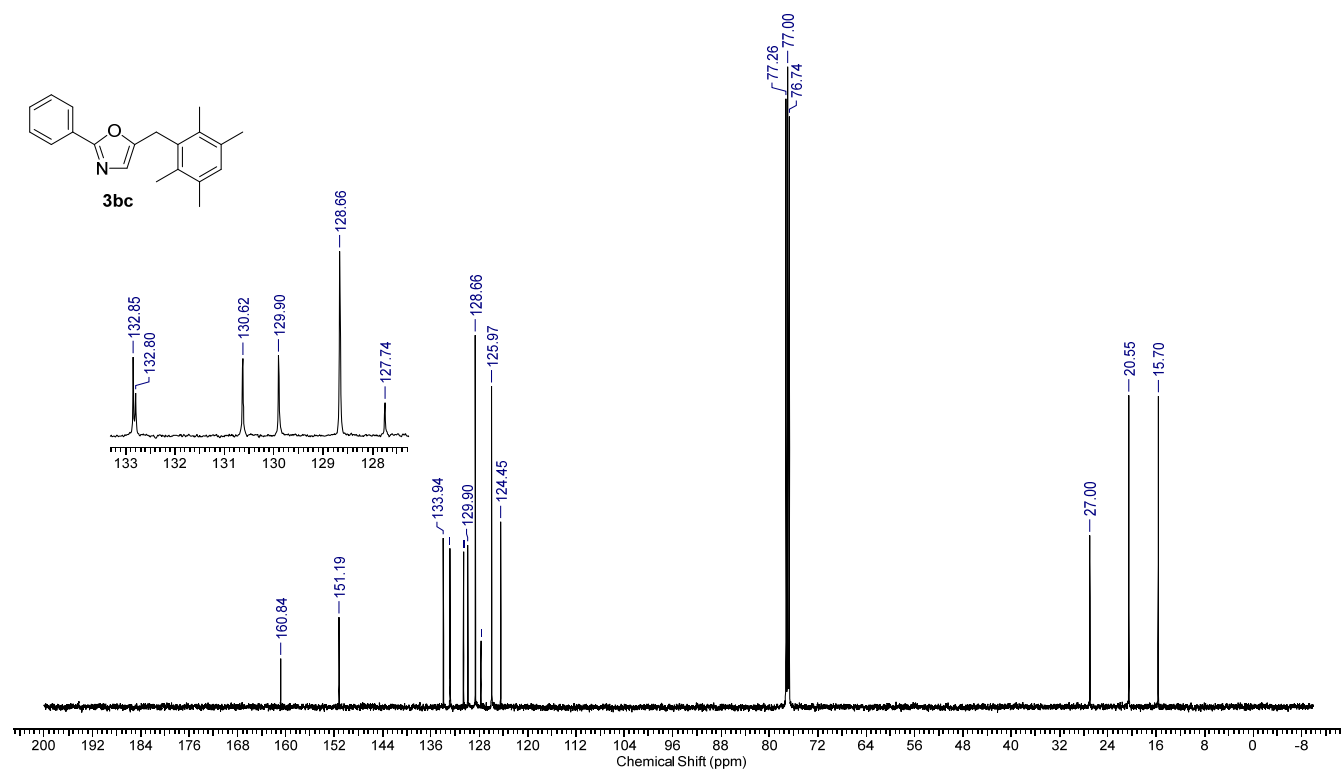

<sup>1</sup>H NMR (500 MHz, CDCl<sub>3</sub>) of **3bd**

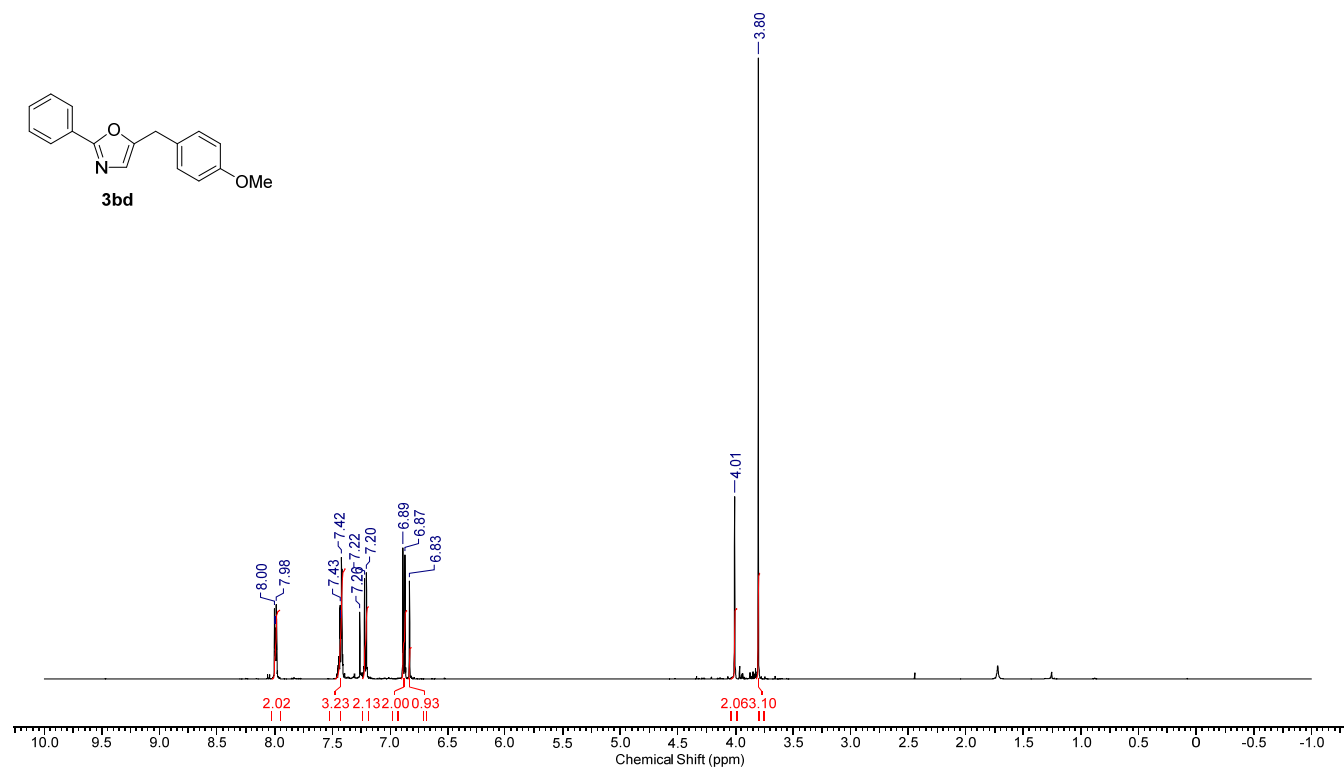

<sup>13</sup>C NMR (125 MHz, CDCl<sub>3</sub>) of **3bd**

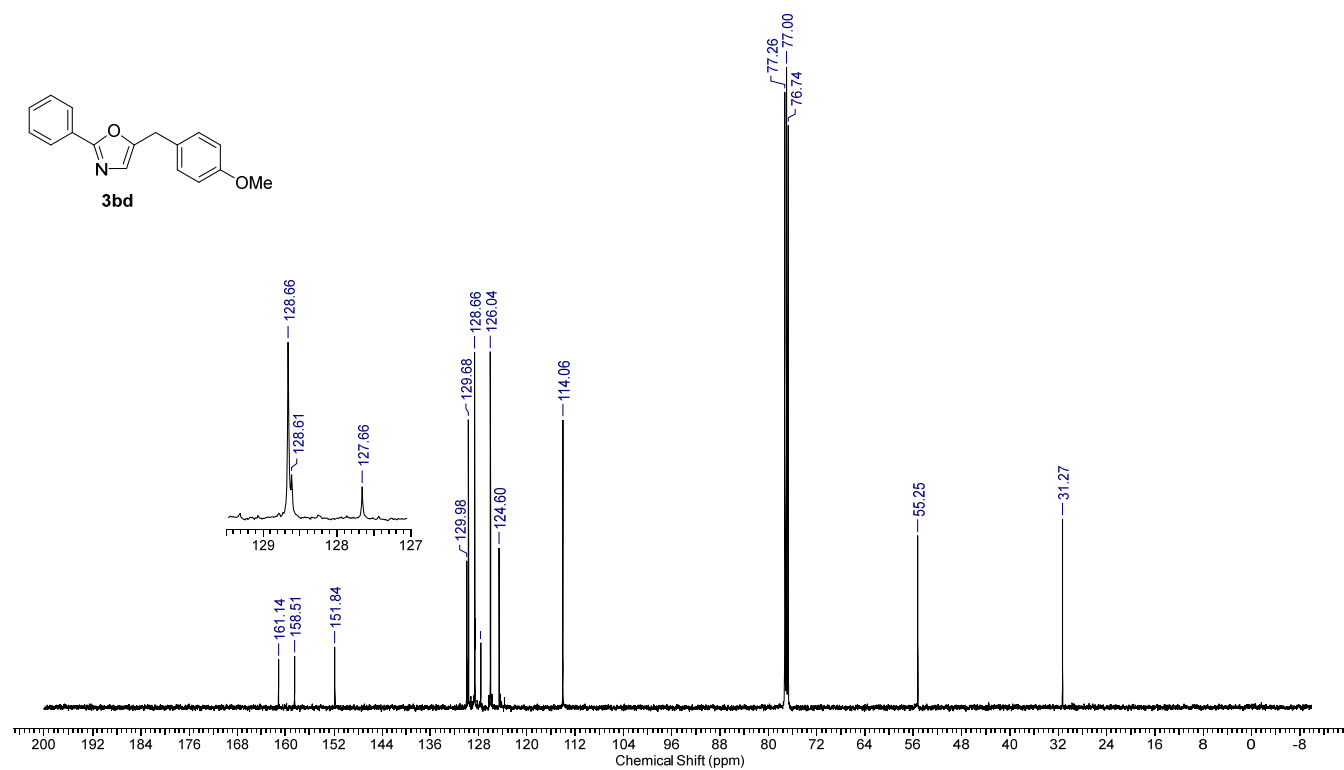

<sup>1</sup>H NMR (500 MHz, CDCl<sub>3</sub>) of **3bd'**

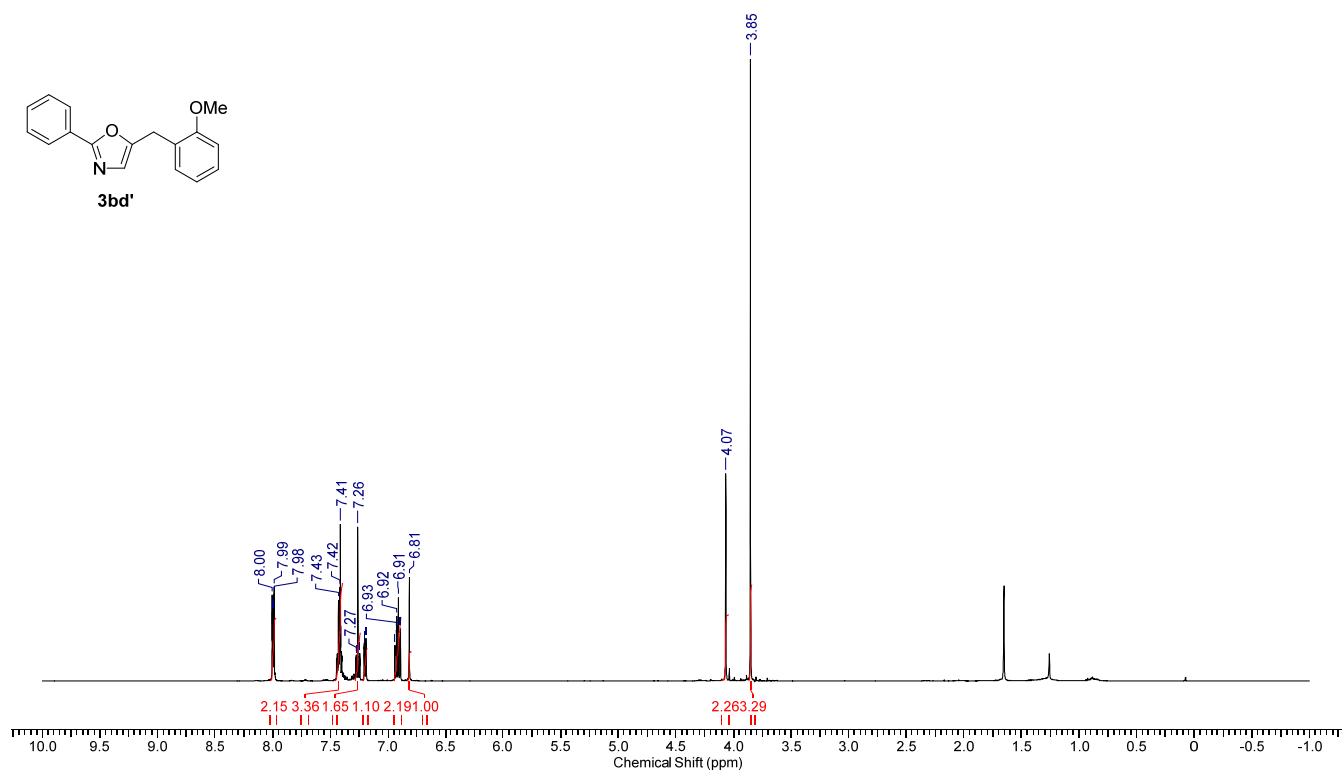

<sup>13</sup>C NMR (125 MHz, CDCl<sub>3</sub>) of **3bd'**

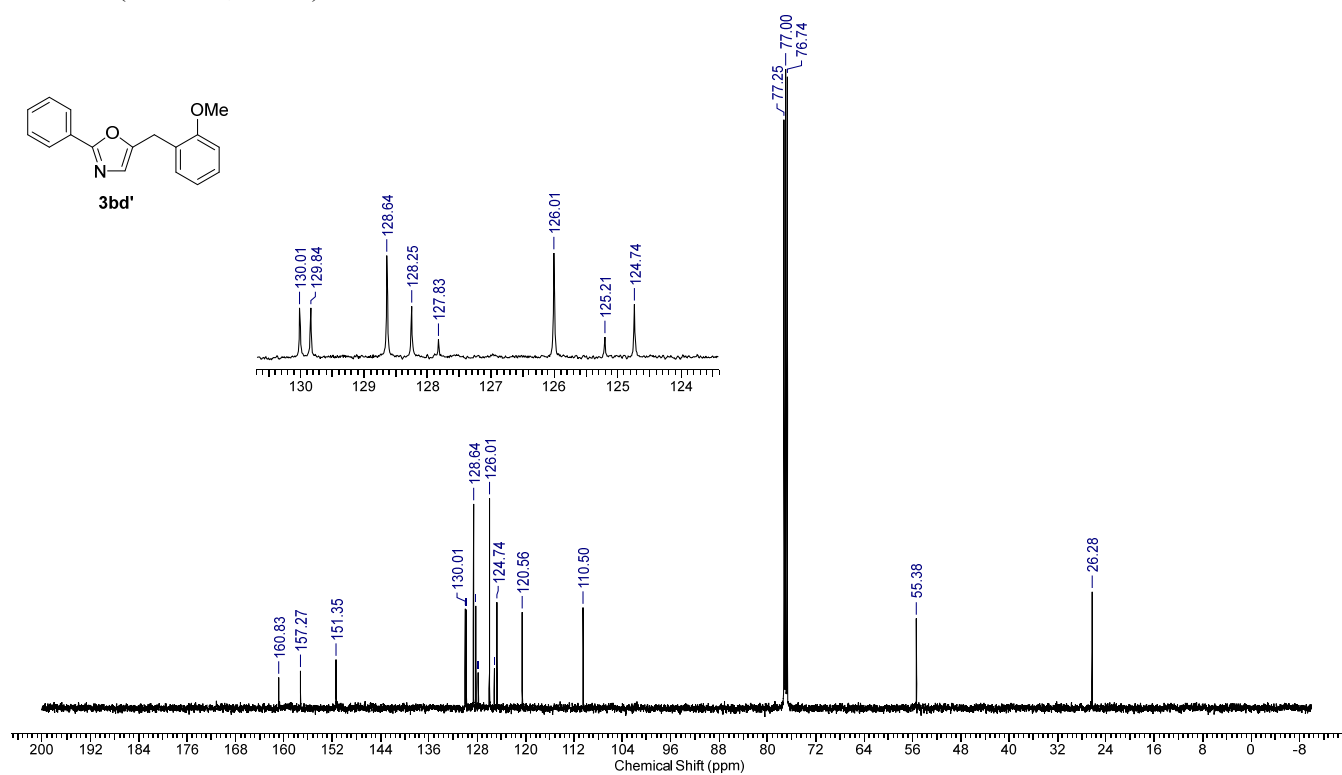

$^1\text{H}$  NMR (500 MHz,  $\text{CDCl}_3$ ) of **3be**

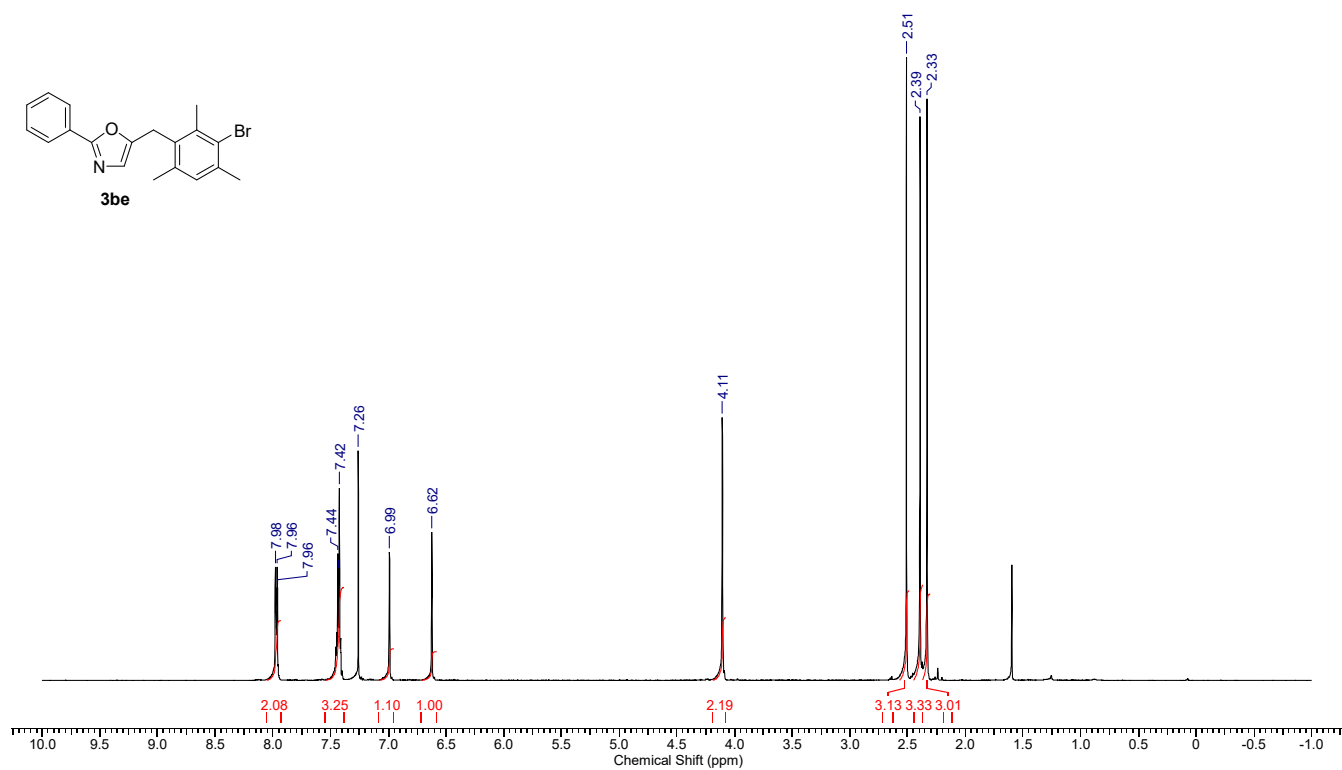

$^{13}\text{C}$  NMR (125 MHz,  $\text{CDCl}_3$ ) of **3be**

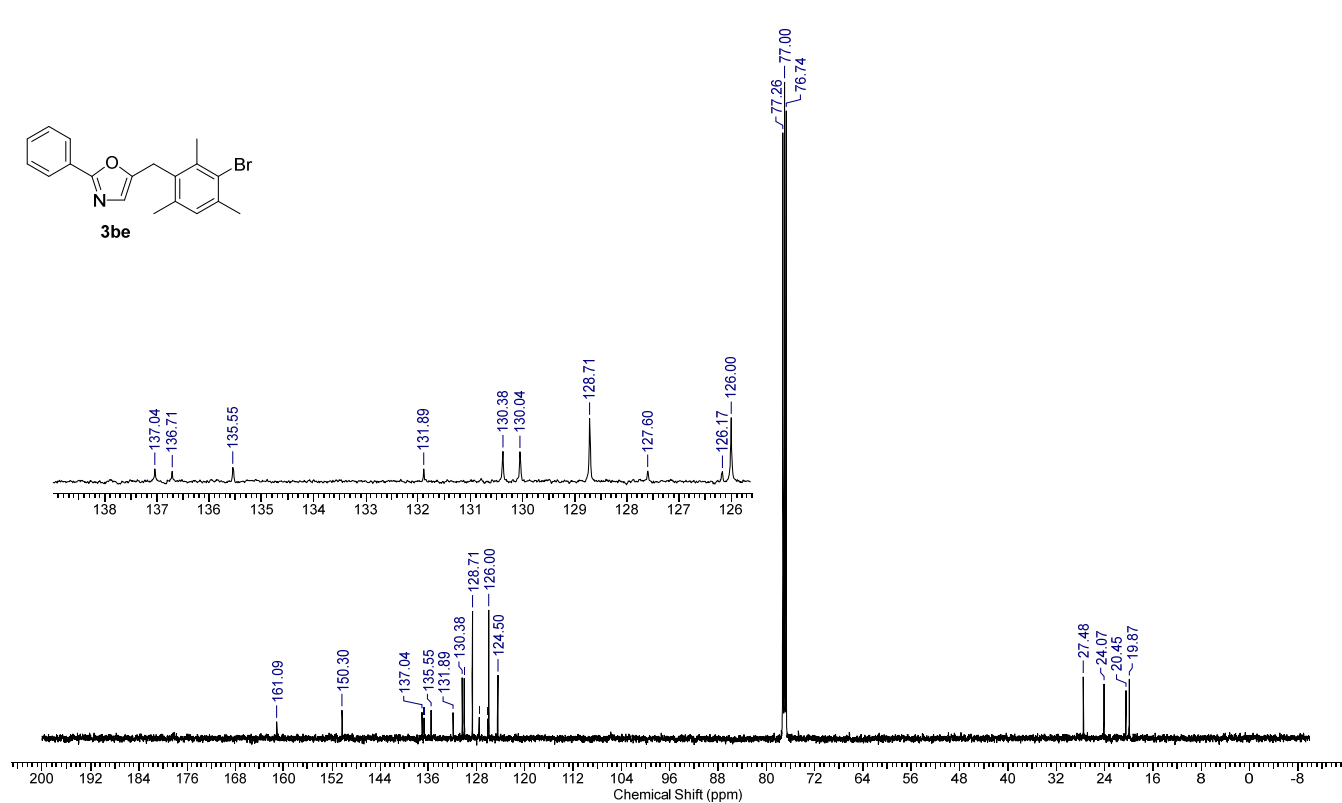

<sup>1</sup>H NMR (500 MHz, CDCl<sub>3</sub>) of **3bf** and **3bf'**

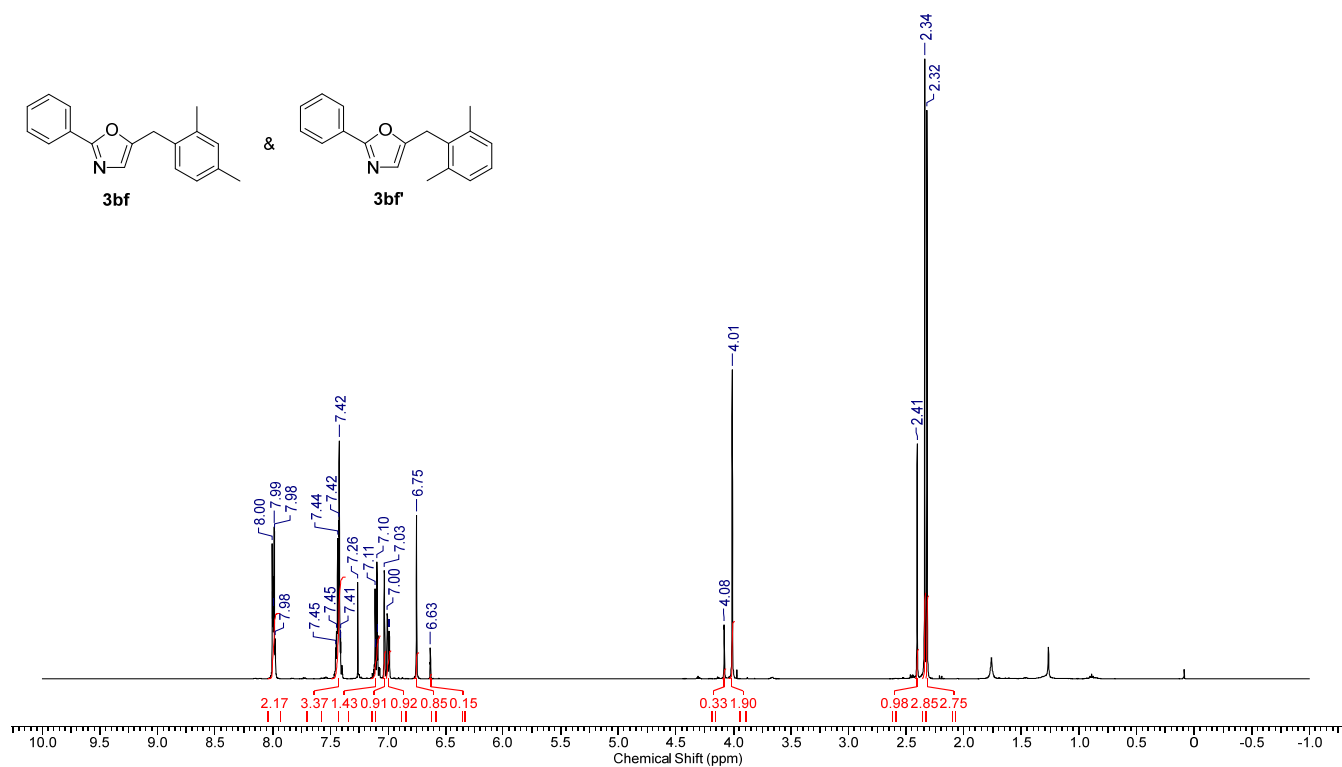

<sup>13</sup>C NMR (125 MHz, CDCl<sub>3</sub>) of **3bf** and **3bf'**

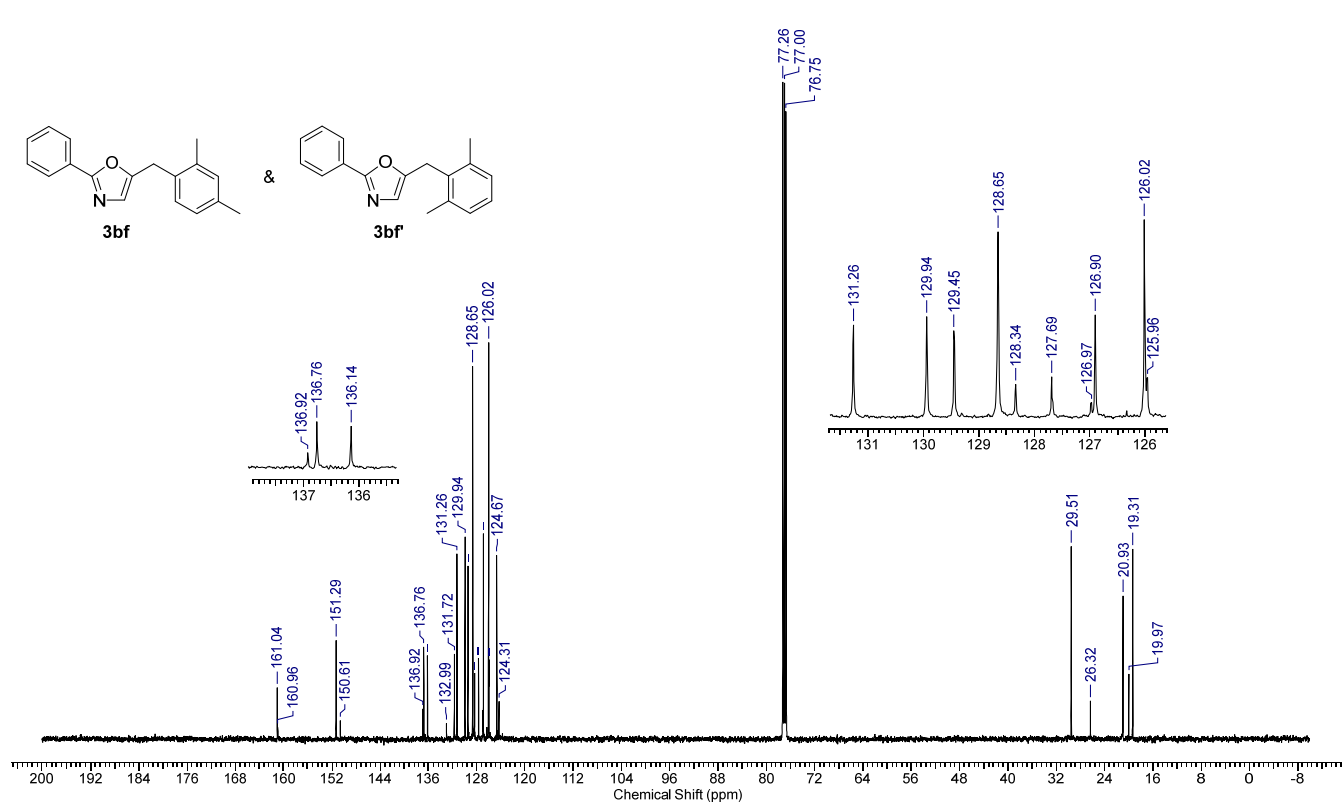

<sup>1</sup>H NMR (500 MHz, CDCl<sub>3</sub>) of **3bg**

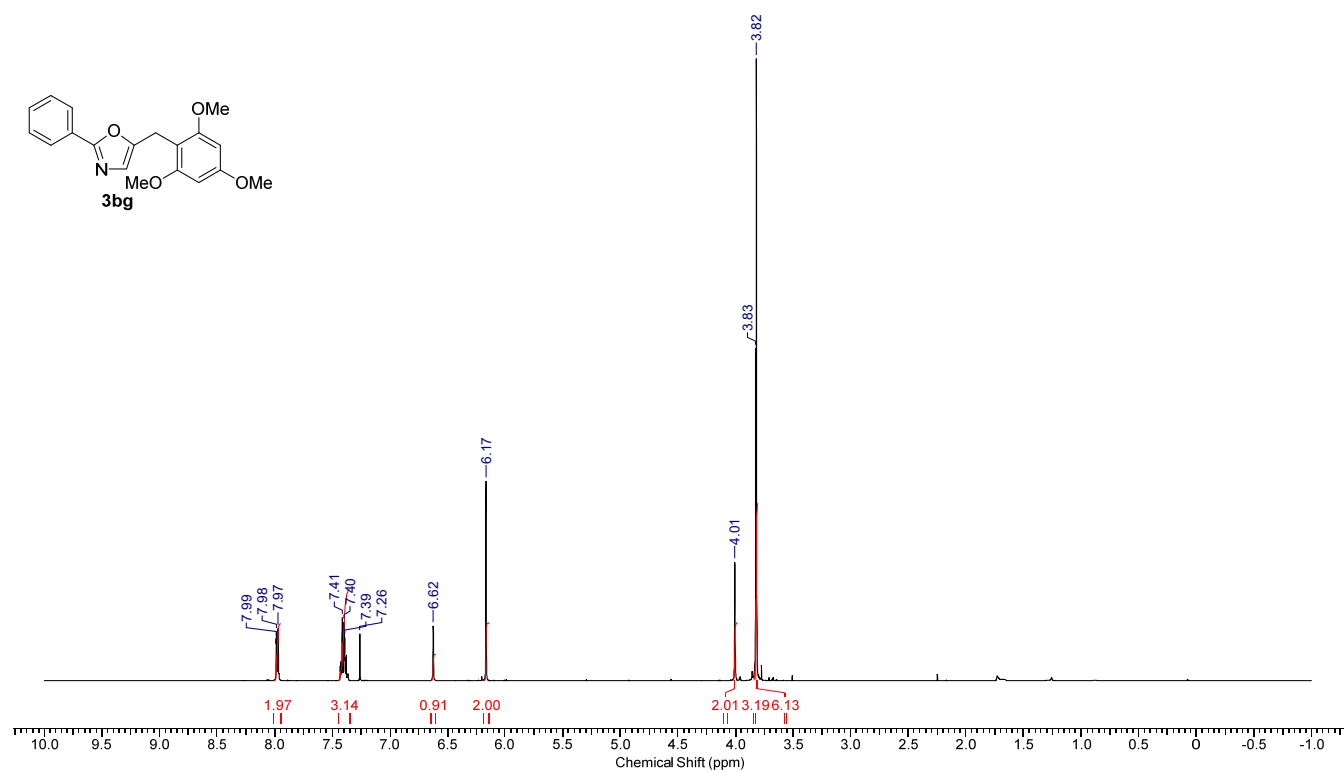

<sup>13</sup>C NMR (125 MHz, CDCl<sub>3</sub>) of **3bg**

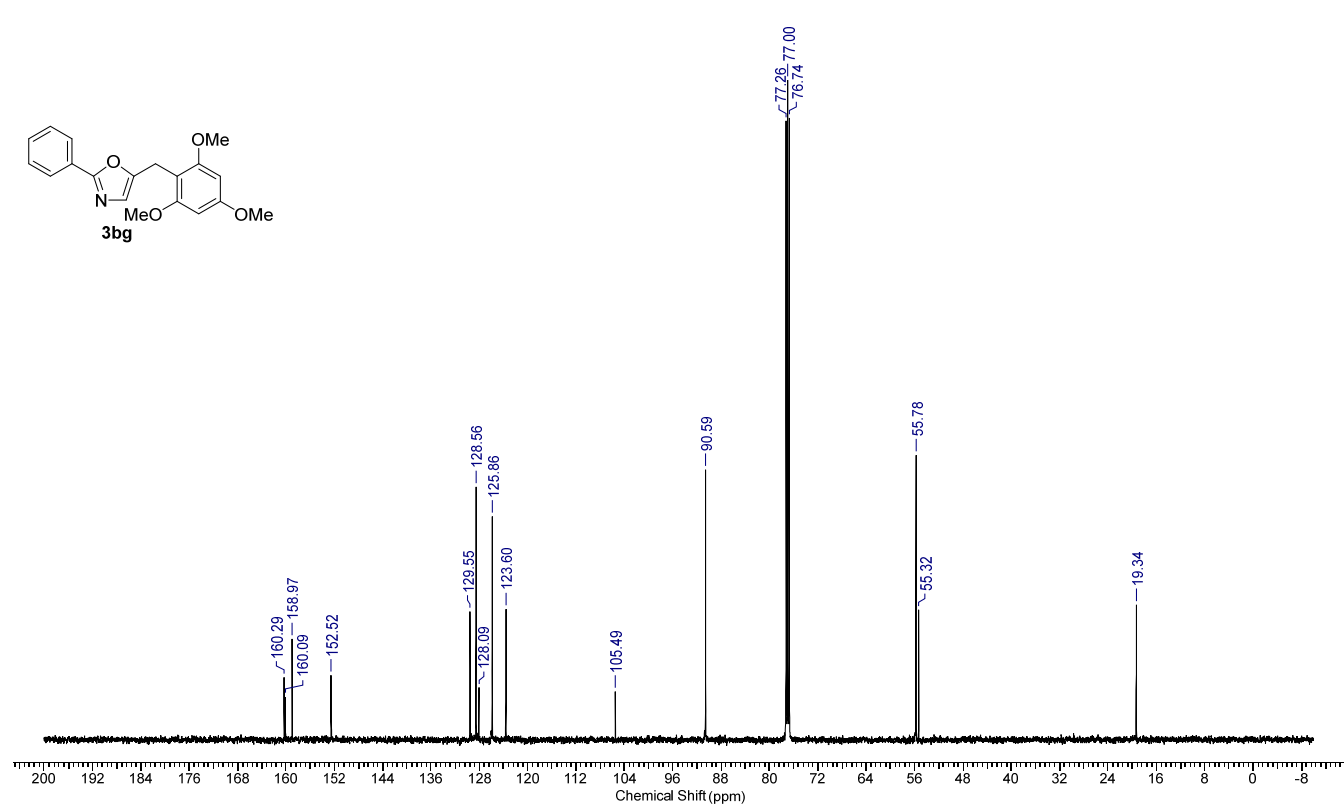

<sup>1</sup>H NMR (500 MHz, CDCl<sub>3</sub>) of **3bh**

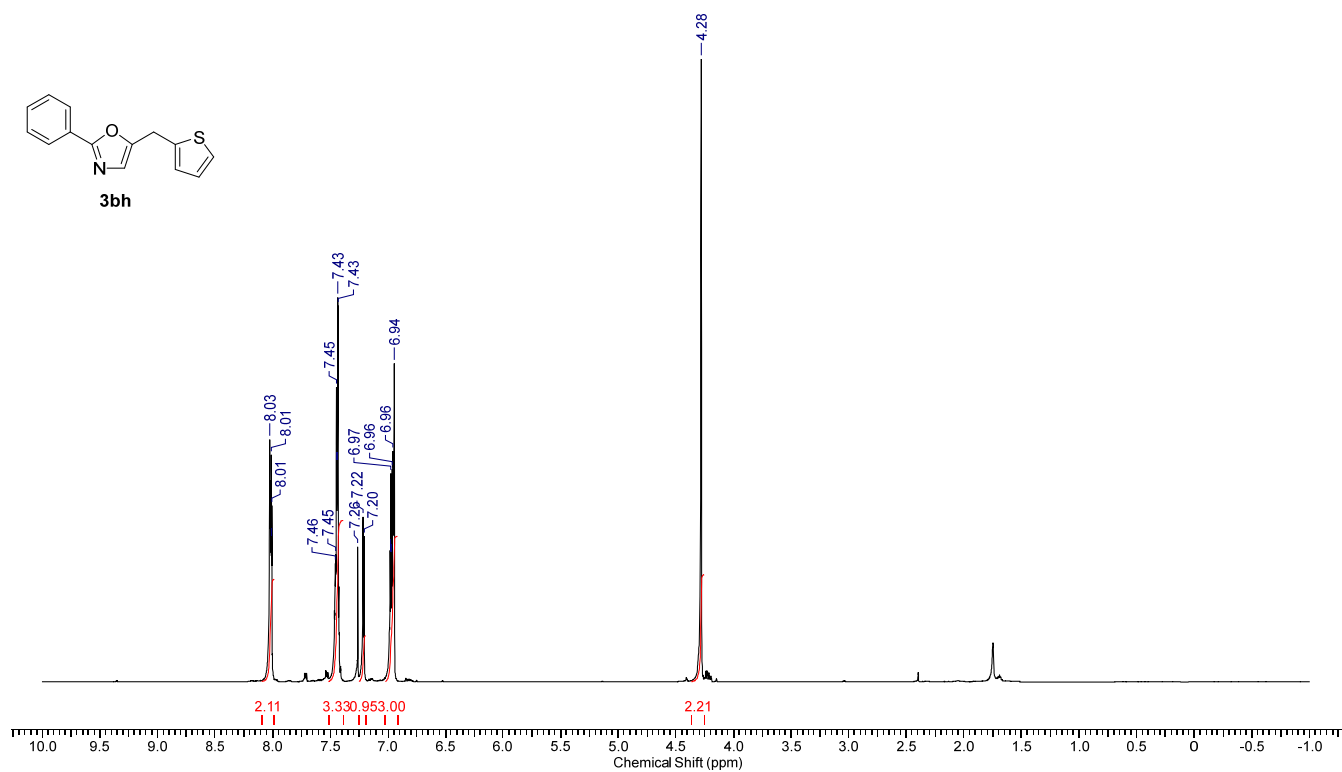

<sup>13</sup>C NMR (125 MHz, CDCl<sub>3</sub>) of **3bh**

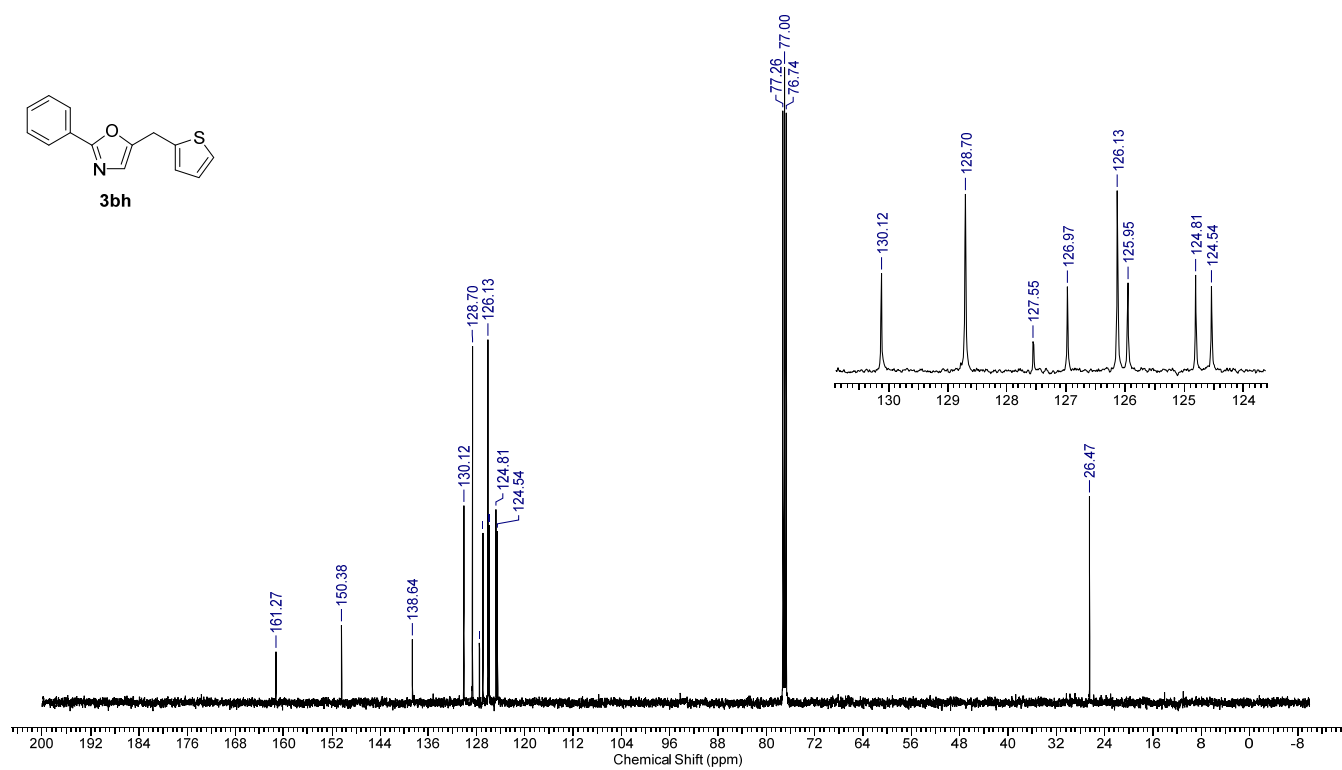

<sup>1</sup>H NMR (500 MHz, CDCl<sub>3</sub>) of **3bh'**

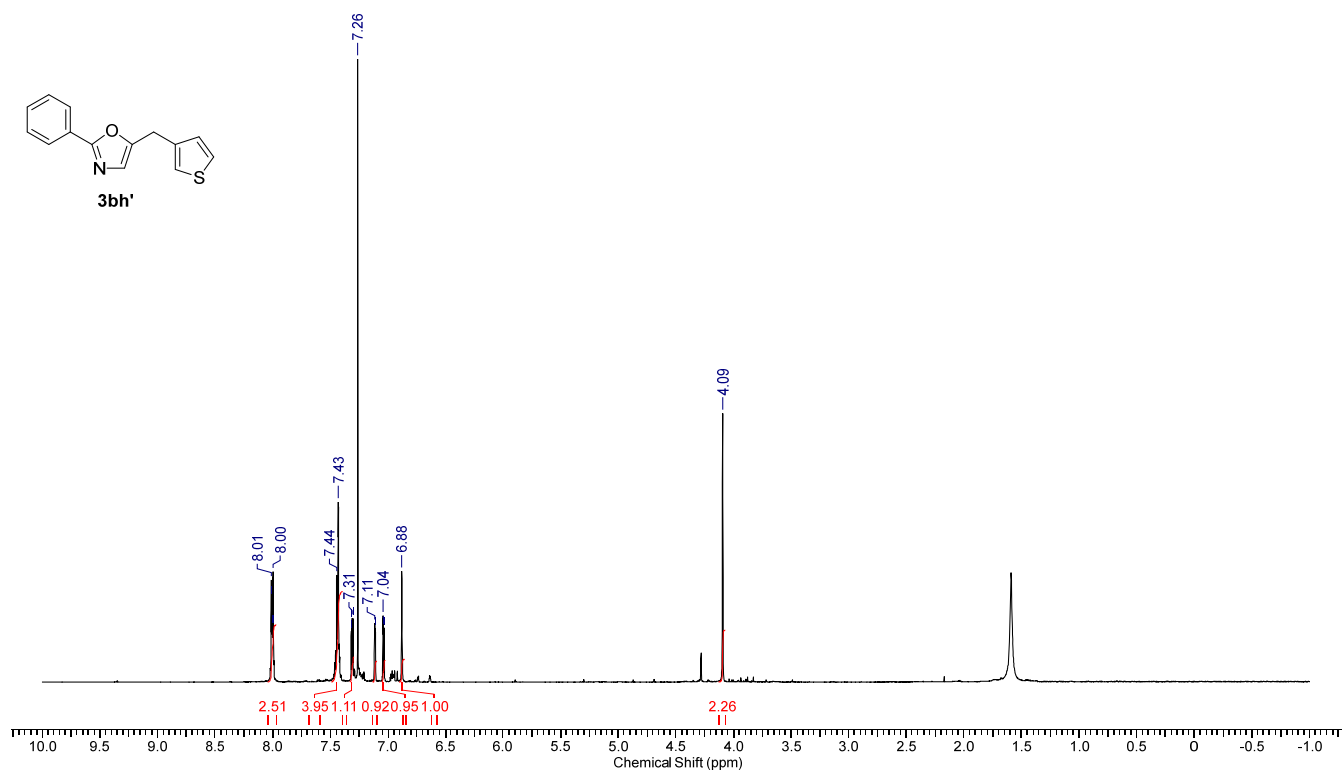

<sup>13</sup>C NMR (125 MHz, CDCl<sub>3</sub>) of **3bh'**

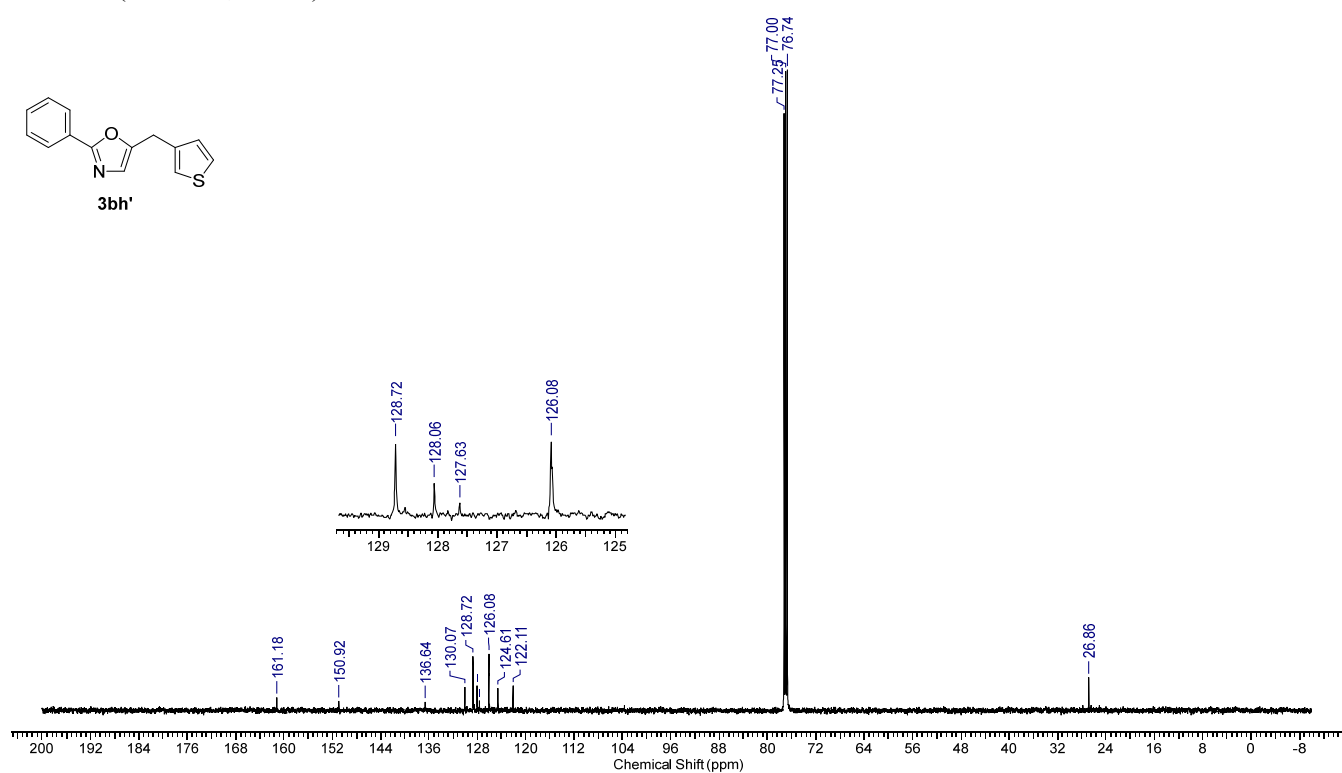

<sup>1</sup>H NMR (500 MHz, CDCl<sub>3</sub>) of **3bi**

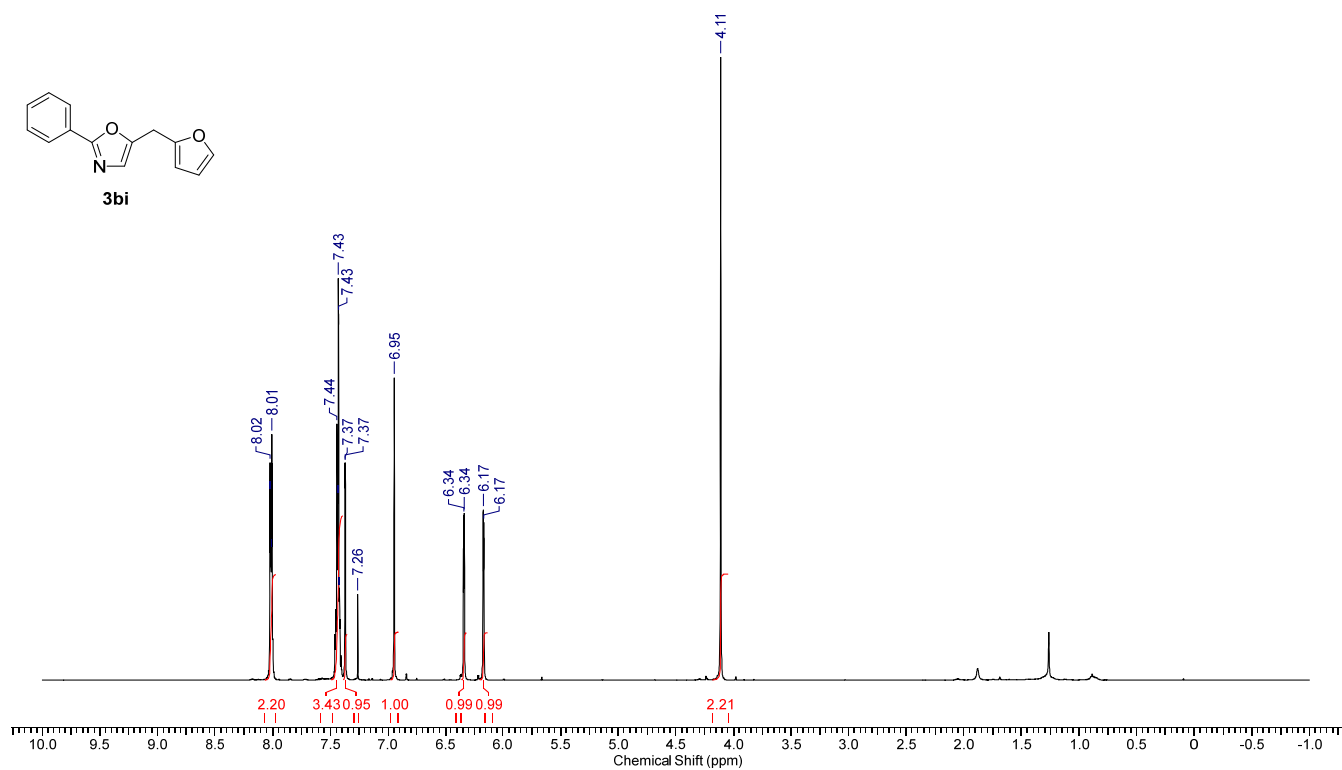

<sup>13</sup>C NMR (125 MHz, CDCl<sub>3</sub>) of **3bi**

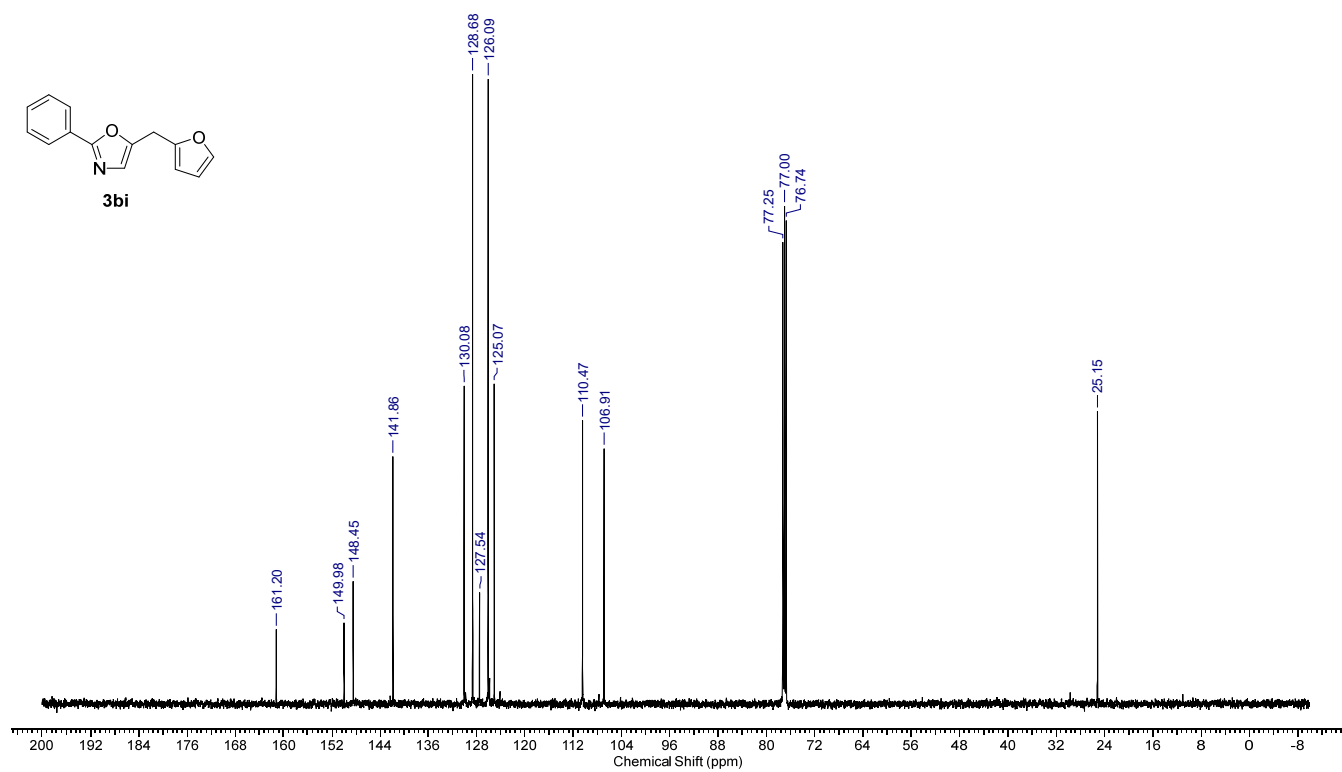

<sup>1</sup>H NMR (500 MHz, CDCl<sub>3</sub>) of **3bj**

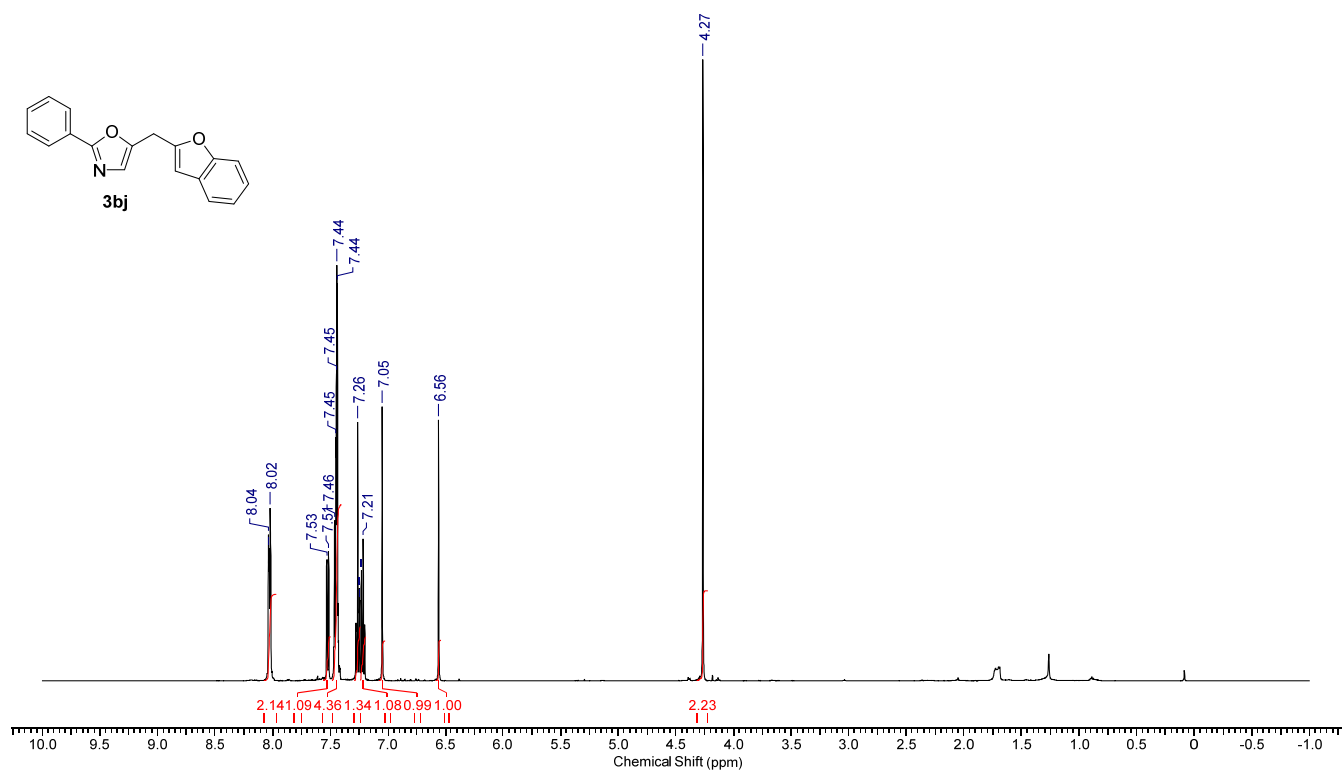

<sup>13</sup>C NMR (125 MHz, CDCl<sub>3</sub>) of **3bj**

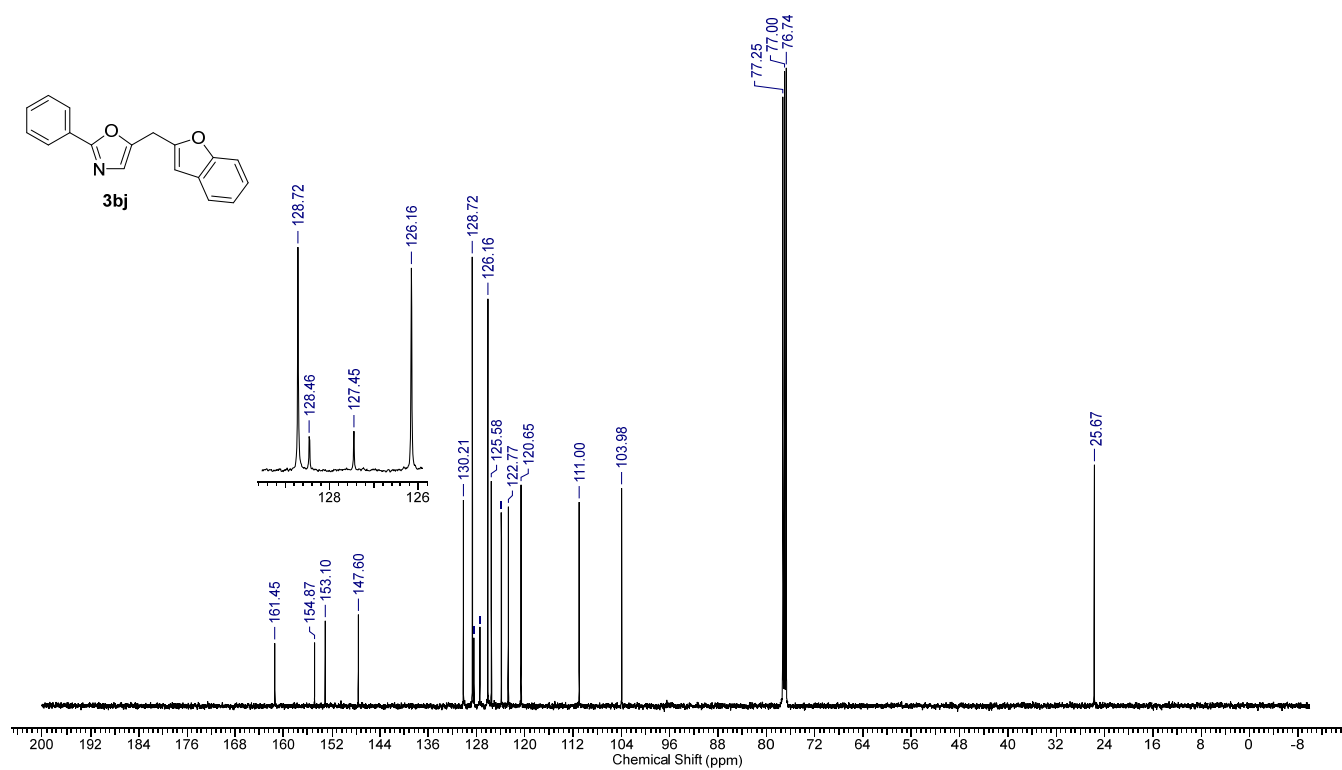

<sup>1</sup>H NMR (500 MHz, CDCl<sub>3</sub>) of **3bk**

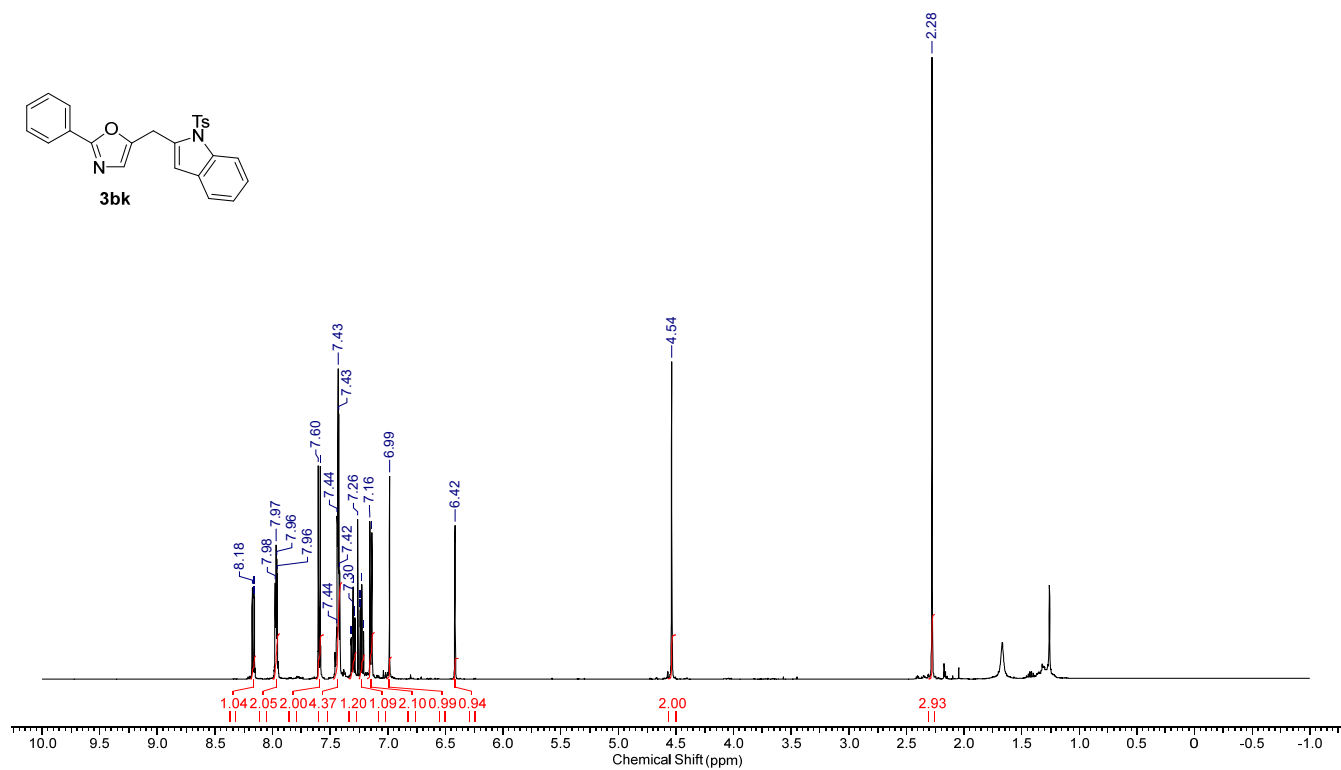

<sup>13</sup>C NMR (125 MHz, CDCl<sub>3</sub>) of **3bk**

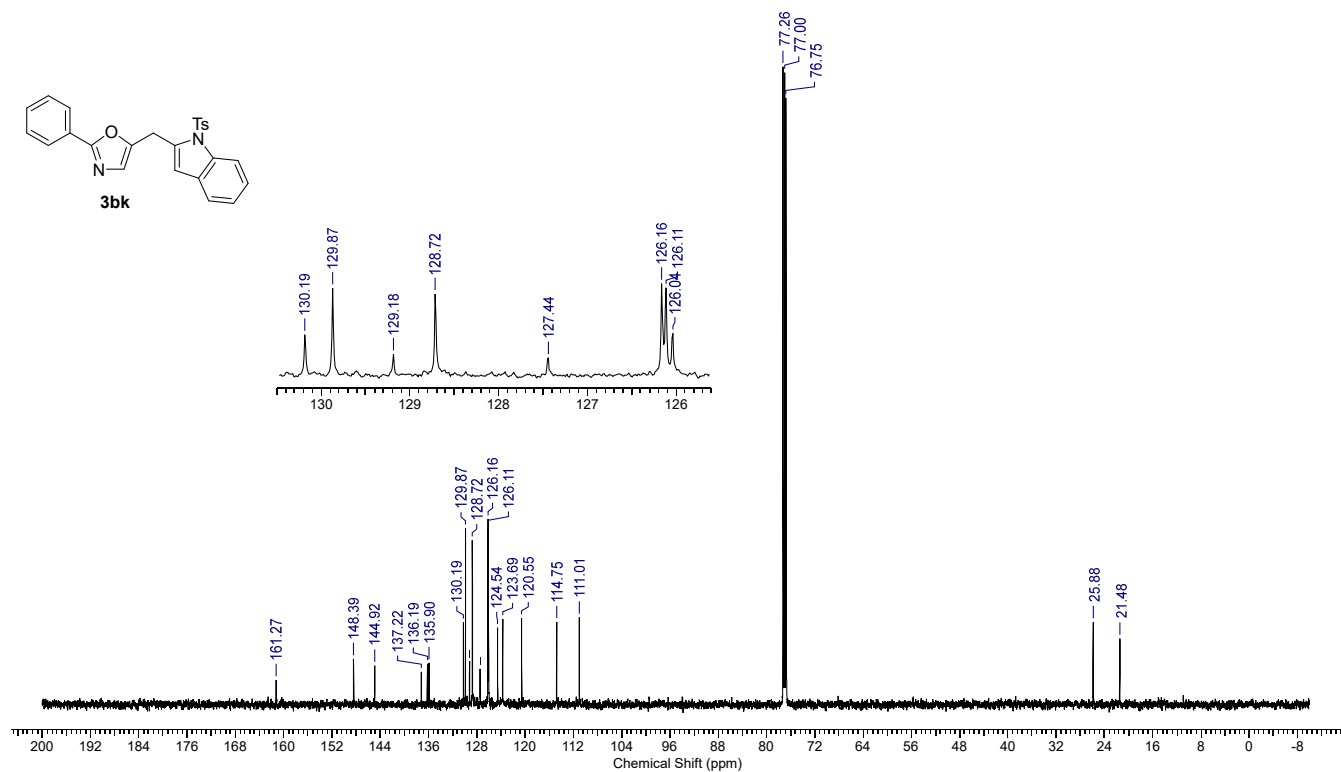

<sup>1</sup>H NMR (500 MHz, CDCl<sub>3</sub>) of **3bk'**

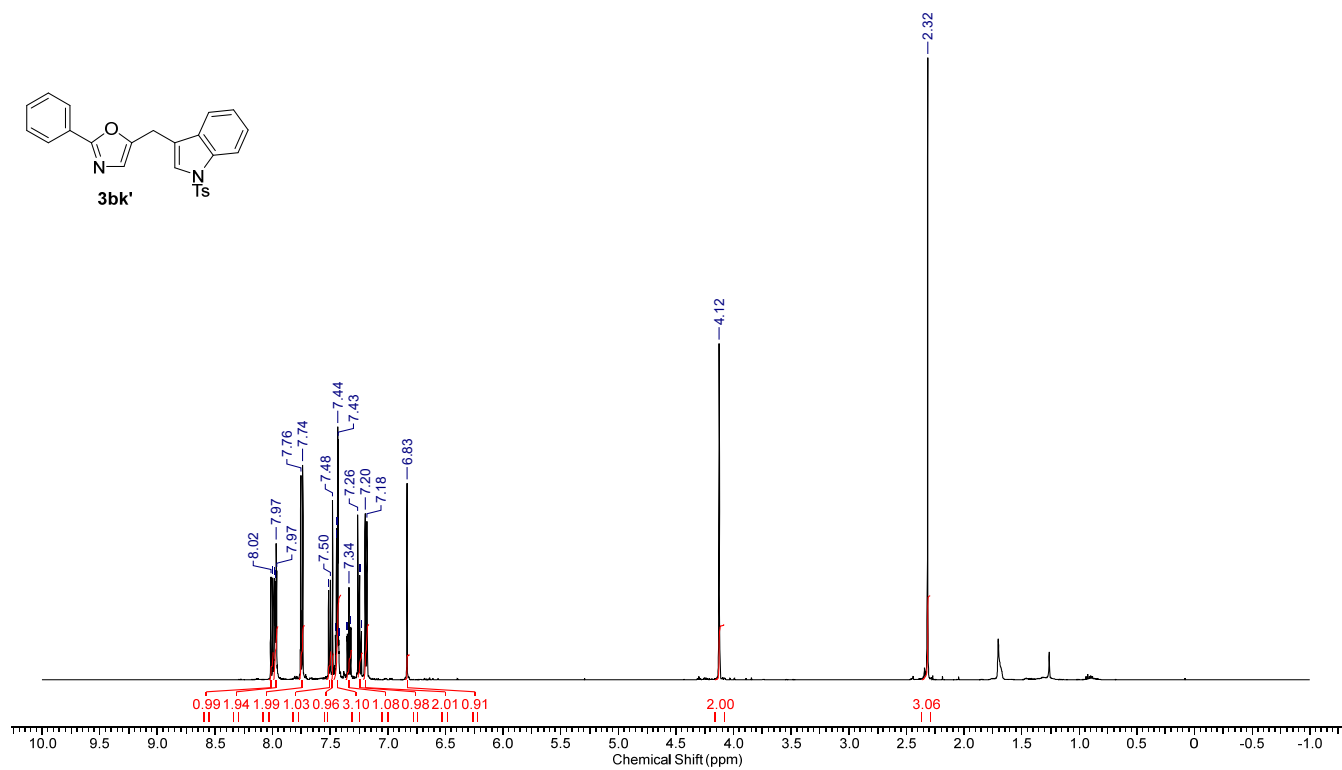

<sup>13</sup>C NMR (125 MHz, CDCl<sub>3</sub>) of **3bk'**

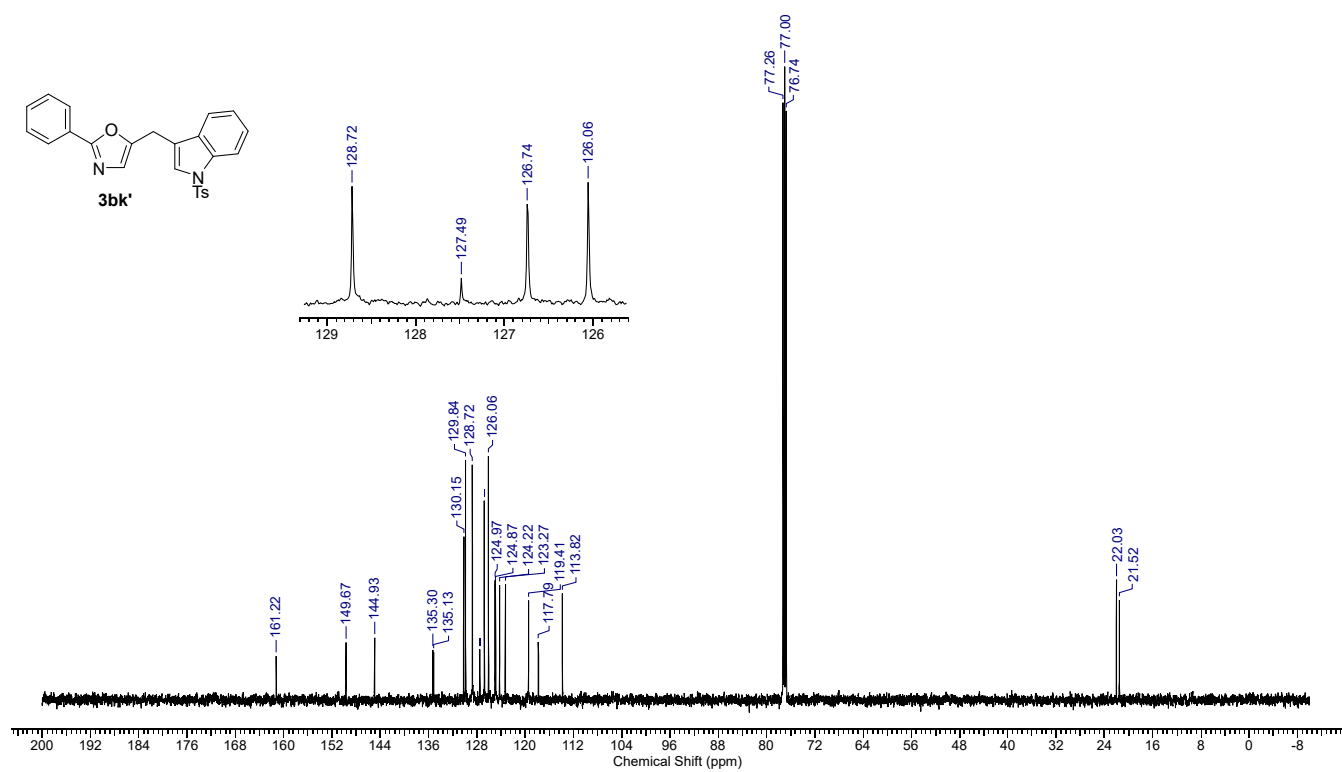

$^1\text{H}$  NMR (500 MHz,  $\text{CDCl}_3$ ) of **4a**

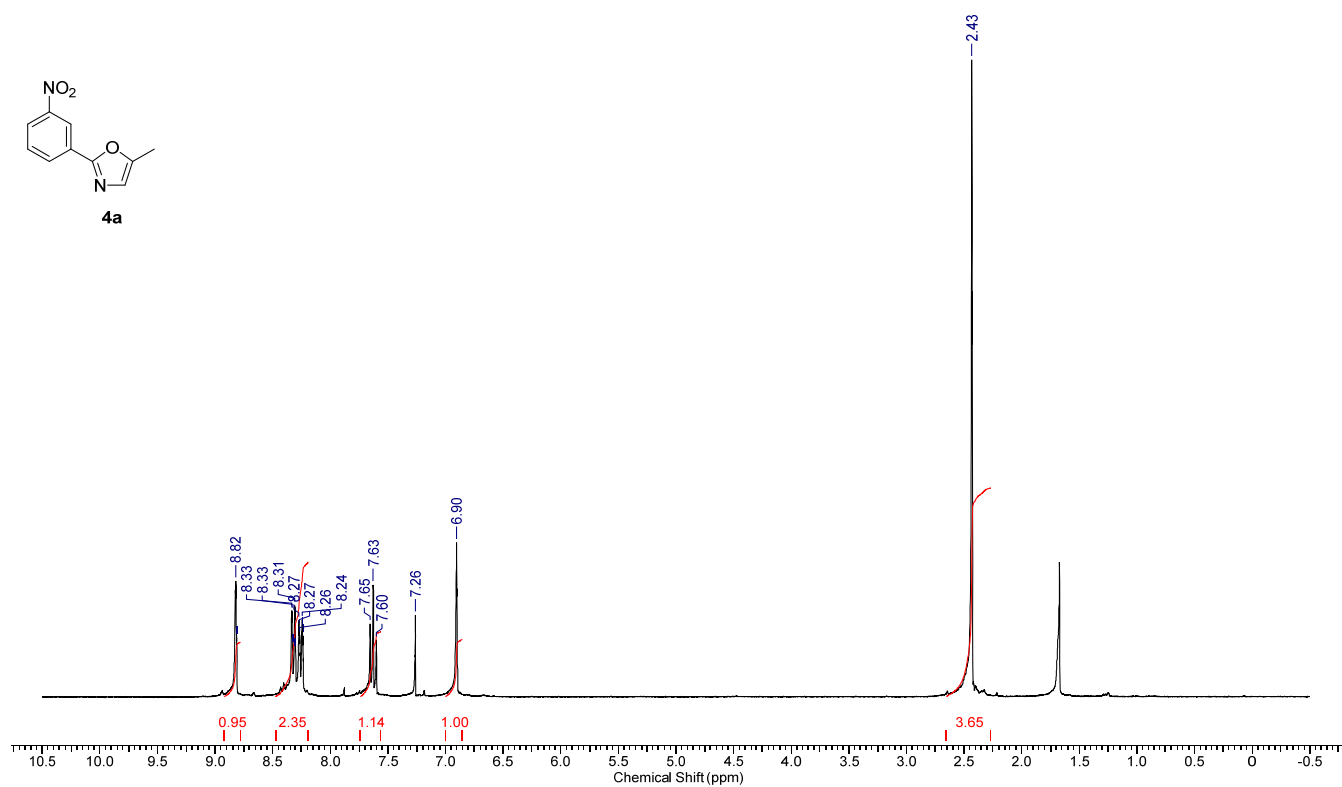

$^{13}\text{C}$  NMR (125 MHz,  $\text{CDCl}_3$ ) of **4a**

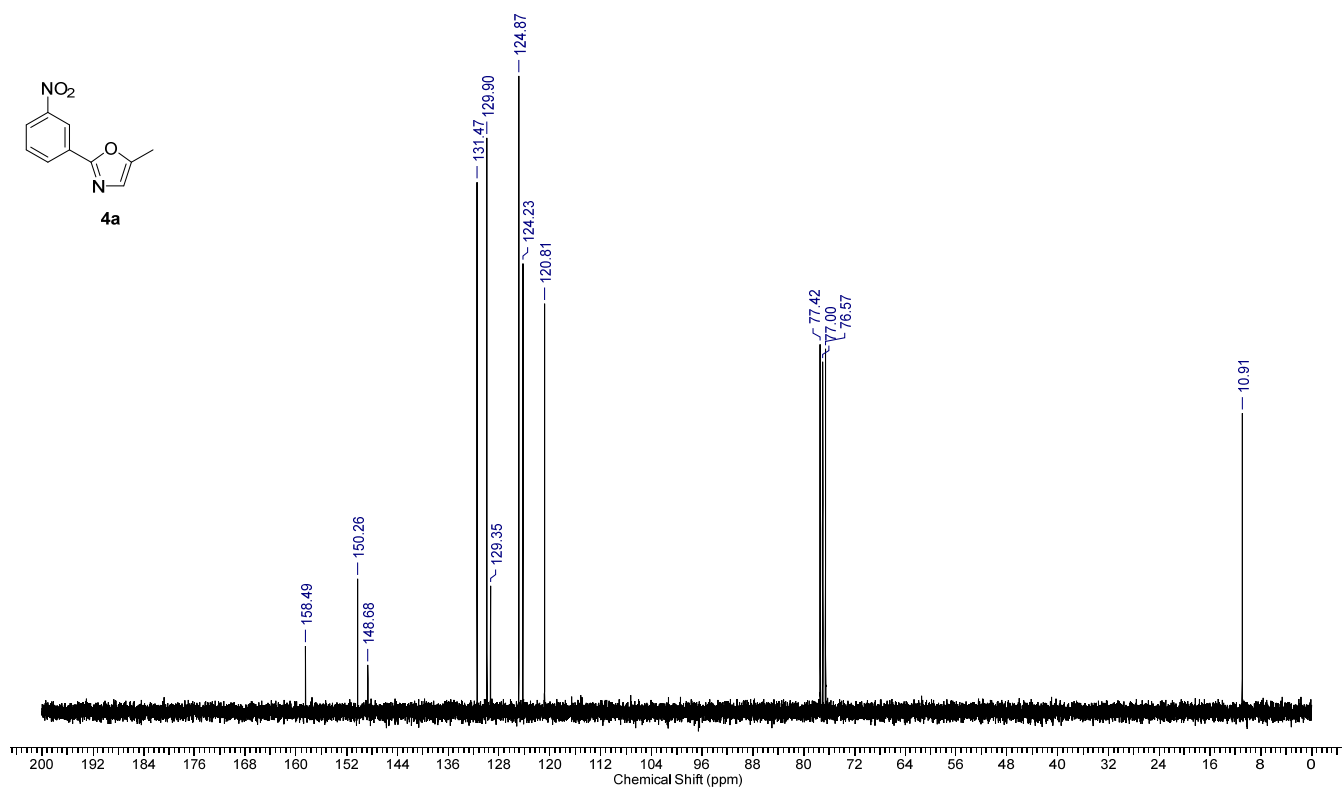

$^1\text{H}$  NMR (500 MHz,  $\text{CDCl}_3$ ) of **5a**

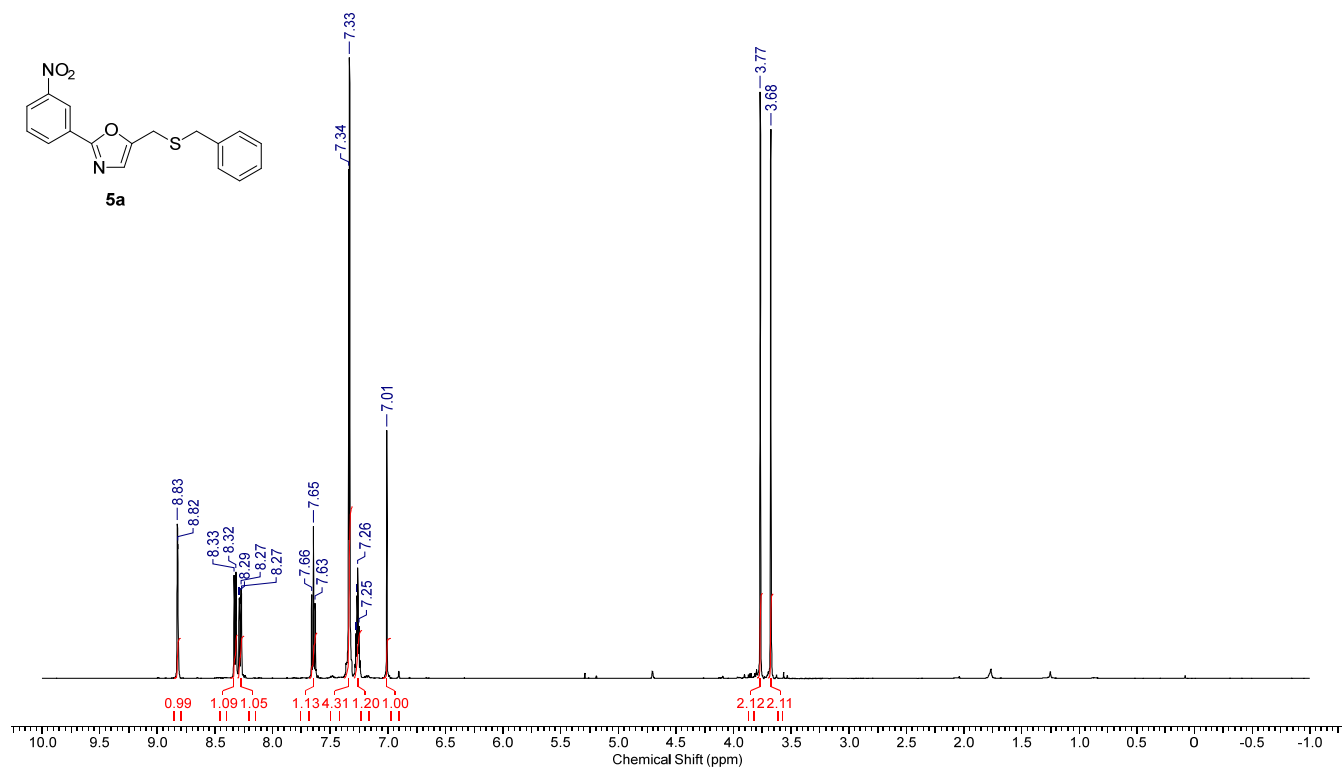

$^{13}\text{C}$  NMR (125 MHz,  $\text{CDCl}_3$ ) of **5a**

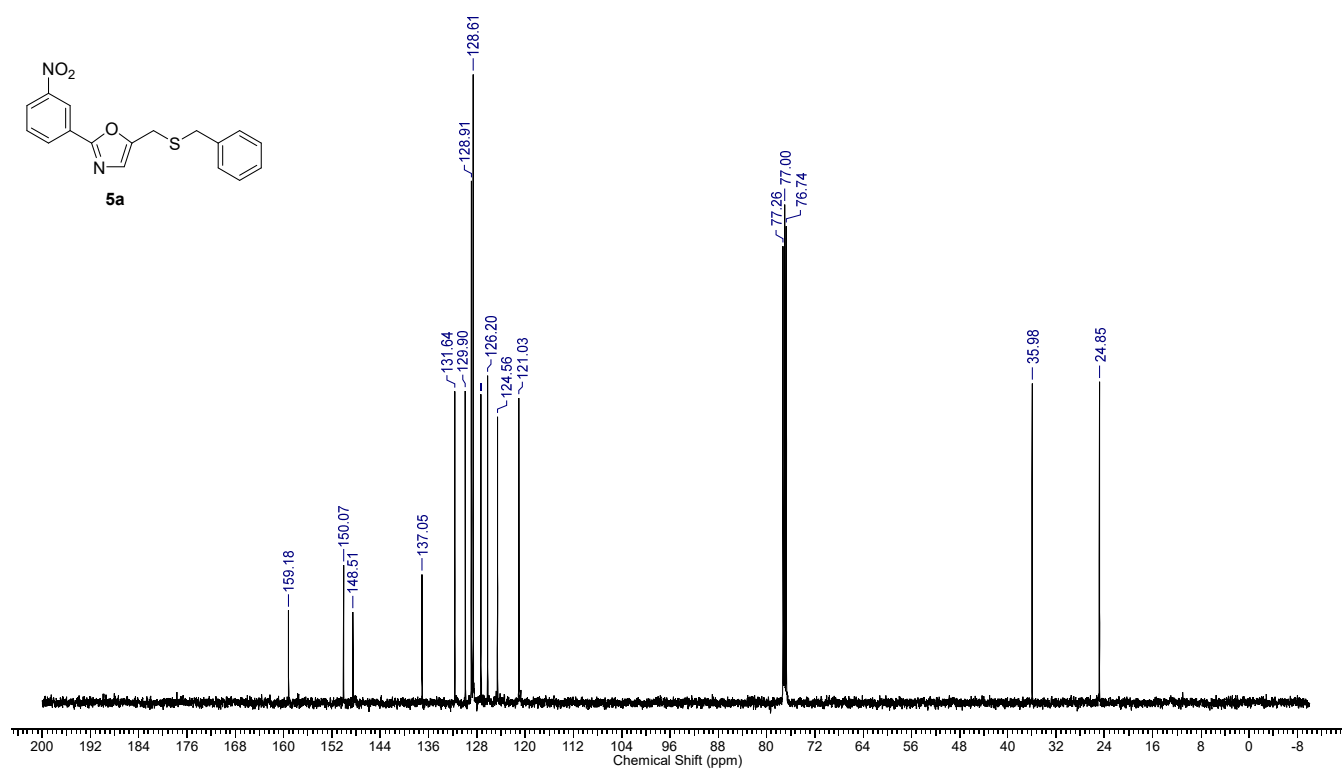

<sup>1</sup>H NMR (500 MHz, CDCl<sub>3</sub>) of **6a**

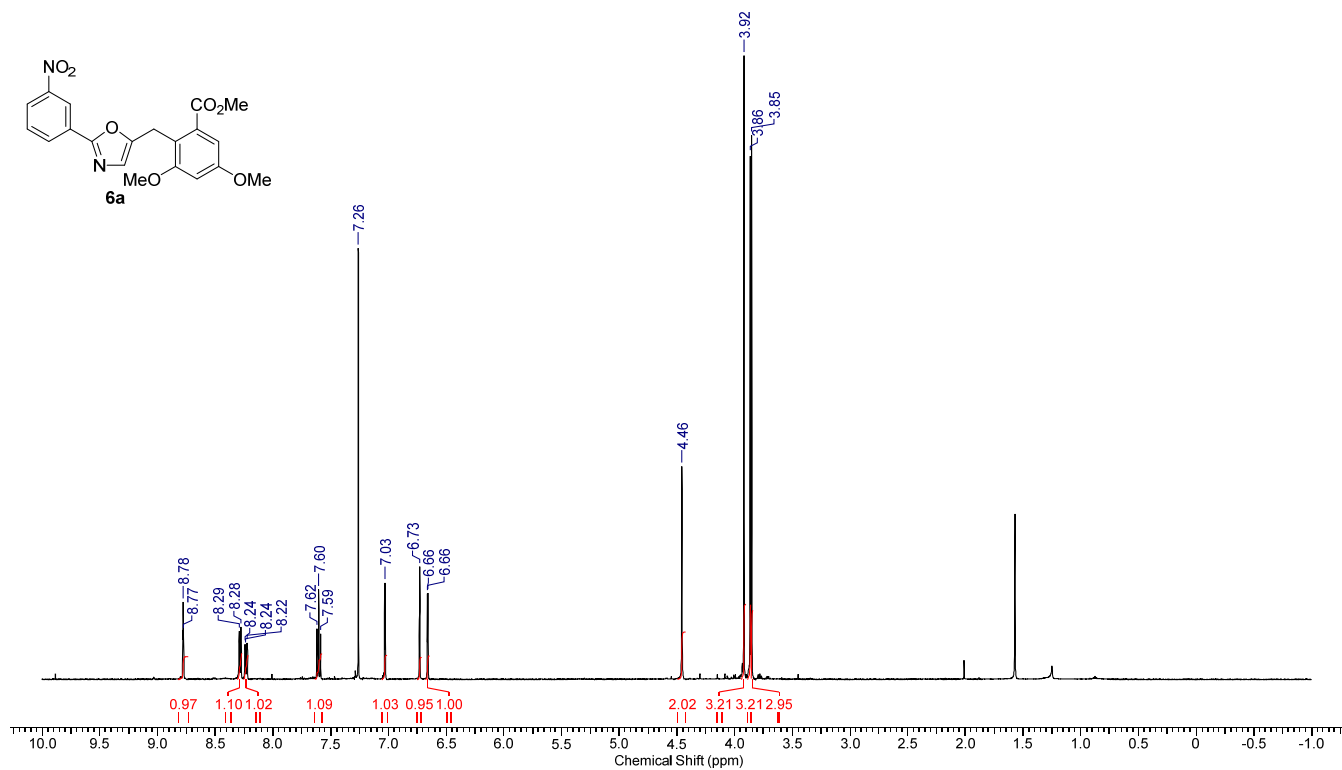

<sup>13</sup>C NMR (125 MHz, CDCl<sub>3</sub>) of **6a**

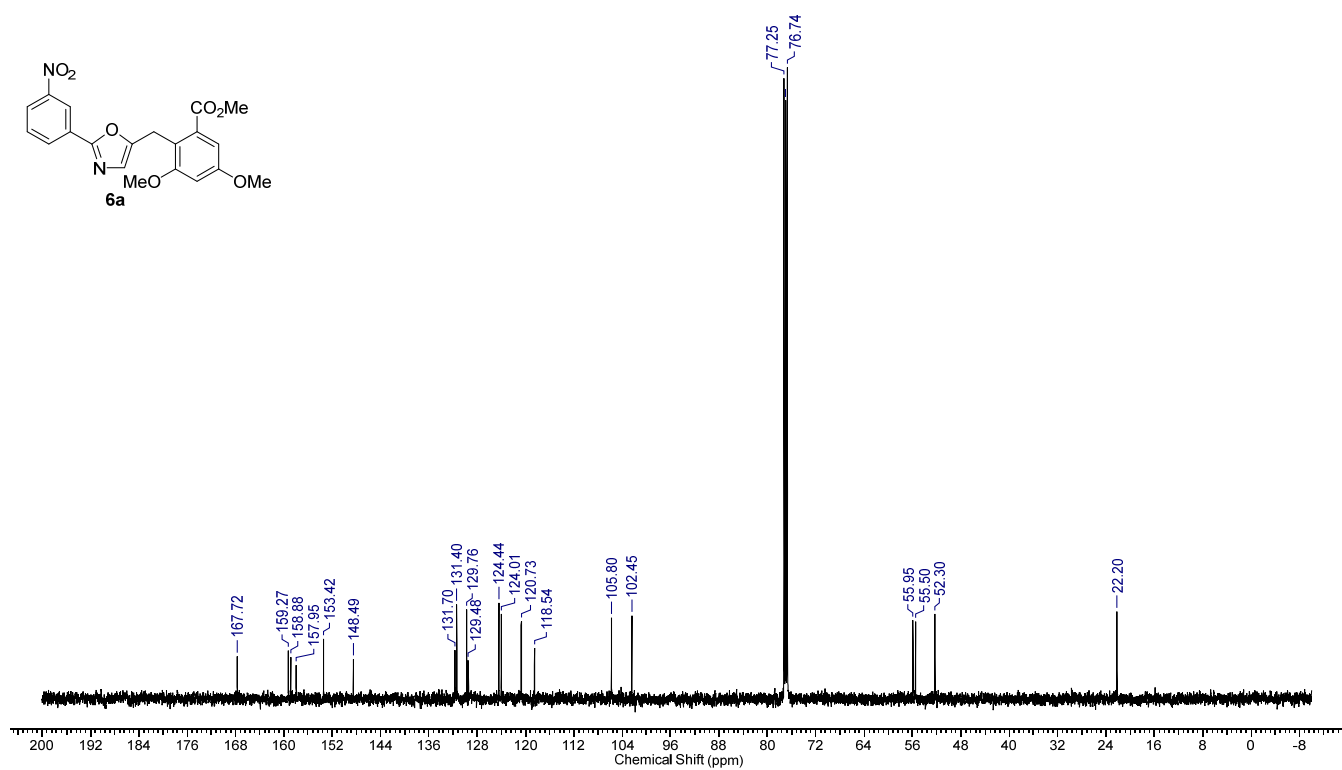

Supplement: d6ob00564k1.pdf [file d6ob00564k1.pdf]
